# Supplementary material for: Scalable multi-sample single-cell data analysis by Partition-Assisted Clustering and Multiple Alignments of Networks
Source: PLoS Comput Biol. 2017 Dec 27;13(12):e1005875. doi: 10.1371/journal.pcbi.1005875 (PMC5760091; doi:10.1371/journal.pcbi.1005875)
Supplement: S3 Table — The full set of annotated results, along with mean expressions, subpopulation proportion and counts, are reported. (XLS) [file pcbi.1005875.s017.xls]

Annotation	ClusterID	SampleID	Ter119	CD45.2	Ly6G	IgD	CD11c	F480	CD3	NKp46	CD23	CD34	CD115	CD19	x120g8	CD8	Ly6C	CD4	CD11b	CD27	CD16_32	SiglecF	Foxp3	B220	CD5	FceR1a	TCRgd	CCR7	Sca1	CD49b	cKit	CD150	CD25	TCRb	CD43	CD64	CD138	CD103	IgM	CD44	MHCII	count	subpop_proportion
Ly6C-CD11b-CD64-MHCII	clade1	Blood_C57BL6	-0.0406922827148971	2.13424952054411	0.356560153754249	0.070126900231637	0.0290374567410627	1.29907569651902	0.0815684013351126	0.0471804424841689	-0.025550217458693	0.585615697426891	1.03549847980584	0.0402679079285668	0.0726623503155664	0.0380317003429022	4.41282877791443	0.380922518185427	4.49298323493249	0.338708335740535	3.28380412832301	0.318679504399229	0.0319287291966082	0.0297346833793722	0.174949060396497	0.0685649155599882	-0.0283724144033837	0.016461171554731	0.283809166860258	0.241654769095366	-0.00493038371486409	0.113386307227566	0.0303776736940664	0.0378077855616451	0.359450657195776	1.69226965646697	0.226189965163497	0.0123917966300247	0.538669344808607	4.26376453266364	1.18161185175325	71599	4.932
CD44-CD8-CD43-Ly6C	clade10	Blood_C57BL6	-0.0421454504263519	2.55598351506452	0.333892676673563	0.0552783495261071	-0.00691638415412152	0.0362436834844082	2.61713719398965	0.21385095329727	-0.00152323949716983	0.0697241185627393	0.123048176336488	-0.0420510952189604	-0.0428156025623935	3.5739069355397	1.47882047575525	0.152448200288176	0.0746283298677521	2.40430539463412	0.365502185877972	0.0458217919553472	0.0734099352231535	0.0801270322754992	3.55376732876039	0.376865587336535	0.0489199233237154	0.388615132127882	0.725055875376388	0.377162054061779	0.0635931231733976	0.210295322792298	0.0787357122124834	2.48959094787544	3.60734714109434	0.433344635715586	0.00898628553909226	0.0107099791180682	0.190934678323706	0.984734758805189	0.110785910316129	144842	9.977
CD11b-CD43-Ly6C-CD16_32	clade11	Blood_C57BL6	-0.0399920467159591	2.32107543480808	0.315533296086001	0.0598770243827075	1.02715967194636	1.33300736596509	0.0863342405316511	0.032414950413352	-0.0319762251528211	0.136005713425494	0.809226804261281	-0.00726849066031416	-0.0265259516487353	0.00266264694077766	0.438695008378775	-0.00854737133802246	4.60235940646291	0.459923609503747	2.74896676495017	0.304206046647923	0.0611017155338326	0.0709917013294672	0.100520990253315	0.229903850355733	0.0330719922850722	0.0318823934359815	0.583946180923424	0.280741334644232	0.148745080825001	0.235346992606047	0.20869086623185	0.0876939445517723	4.69645580533178	1.11392825277395	0.126926878369177	-0.00687237986667487	0.244679608842077	4.05974590887867	0.637613332820306	47075	3.243
MHCII-IgD-CD16_32-B220	clade12	Blood_C57BL6	-0.0448042746418441	1.63155183846904	0.287354064535212	0.693296581714008	-0.0264819875731604	0.00576105546811163	-0.0316999784796799	0.0160462657906845	0.174237266171195	0.054355550414141	0.111191752397965	0.930707835167577	0.0131720775968515	-0.00467630630326626	-0.0216171902777169	-0.0484015068073717	0.0325864147521099	-0.016368217253219	2.10493888432384	0.238905358146474	0.0177595788080235	3.61542373712413	0.384626871554802	0.098681695045596	-0.014772889389353	0.195869145474109	0.316527047138037	0.294985387817059	-0.0119898635496579	0.185973896256349	-0.00681710086069376	0.0115209743777765	0.045803871479343	0.101277272802573	0.0660983885886298	0.0700975552973179	4.62075875686464	1.53931326915347	3.41946197219094	55720	3.838
CD3-CD11c-CD44-CD49b	clade13	Blood_C57BL6	-0.0414598915932331	2.88054343459881	0.379741231910652	0.0553485864275411	0.489642888307201	0.0807065861493321	3.4402291487902	0.350967350750512	0.0226930267415441	0.0757334561427655	0.123429561777499	-0.0474411658689651	-0.0512694705076583	0.750594269127097	0.397490872520304	0.0578295472837069	0.100234971819886	1.7378251727624	0.395625254959864	0.0358895829398589	0.0387153175038317	0.202783825600575	1.40503224229854	0.308172895818844	0.431653331769357	0.142930004682165	0.402993647334826	0.690777822566484	0.0538469731500406	0.263891116721901	0.0692994338369089	1.1044168376612	1.01392622829515	0.339839146234378	0.0822151338720435	0.014952536981094	0.355460190612494	3.50397763387254	0.510746095010321	2868	0.1975
CD16_32-CD11b-SiglecF-CD49b	clade14	Blood_C57BL6	-0.0441247824958316	0.986176271331128	0.238983895831581	0.0376199066969246	-0.00782782457583321	0.101997875750272	-0.0172734007879218	-0.00275490885515117	-0.0510467983830401	0.473847910664813	0.0874064467008672	-0.0419728644948318	-0.0526746593240217	0.0271869169816842	0.186130587713396	-0.018163442251012	3.71329960693576	0.41324802994983	4.64831207082541	1.40194397620422	0.185853410885537	0.0294116296192294	0.0731828983943486	0.76656795623658	0.0297556903720004	0.0126646172171971	0.108320149922117	3.22988708851161	0.163929822250046	0.0812724884345251	-0.0329321306991536	-0.00741203748020634	1.04255233650408	0.081002627413157	0.0744984491952478	-0.0300028689628267	0.263683793746222	2.87052136359916	0.29133815960152	5614	0.3867
CD11b-CD44-SiglecF-Ly6G	clade15	Blood_C57BL6	-0.0183101284642375	1.8547747625014	0.719577656232584	0.0963091203265594	0.0418294396990313	2.83442764520017	0.278548815225535	0.154493404155638	0.00455890597074261	0.782970189651094	0.422050673827691	0.00467145701203162	-0.0241443775549677	0.0312687249979423	1.35851429019107	0.0407817468402301	4.36631875754595	0.433705169752597	3.29891489243476	3.88793290712109	0.554744150753652	0.133041444905552	0.0604743898487493	0.080090212705547	-0.020288162759003	0.0649126622032404	0.169655904455125	0.612354796543378	0.0153984421855938	0.126222342836391	0.00241179887258667	0.0430881525886152	0.594532896238511	0.188684594069848	0.0424798381926865	0.127867618360683	0.45987743971992	4.82557655008373	0.843234305445634	21828	1.504
CD44-CD3-Sca1-CD43	clade16	Blood_C57BL6	-0.0425114071554387	2.84337234160113	0.368118187786042	0.0550540725412863	-0.0321592833650018	0.0509302917082602	2.90309192428493	0.226126474896644	0.0127547396146463	0.0936315688212046	0.146190134953729	-0.0441352315690992	-0.0360767276771123	0.100959046958766	0.406295492396745	0.205968925880849	0.0859682128957336	2.0525513421809	0.32953184546866	0.0503835804429516	0.0814499104649506	0.182595169493408	2.93830376357289	0.424057601667102	0.0626398273184183	0.232577942052108	3.73663869651081	0.617028786279885	0.0633845166525845	0.362642861765167	0.139077906540656	2.25618771624971	1.27069877416566	0.287063435444583	0.0326201939259349	-0.0114054830062553	0.283862681487828	3.74730746171051	0.513307943243235	4306	0.2966
Sca1-CD45.2-CD5-CD44	clade17	Blood_C57BL6	-0.0337116005230232	3.16066620263436	0.442471168179277	0.0768487202291565	-0.0217459378817958	0.0745742801138584	3.14597158518439	0.264830682748145	0.0180145121475608	0.128052229741399	0.172854871454978	-0.0376783257575848	-0.0314348822153787	0.0377299608900208	0.236074855361209	0.19234239585141	0.0942934461538607	2.18380815097752	0.374903499560919	0.072006672448733	0.113882034811193	0.212144413948742	3.45942664688724	0.520273362405831	0.0940365723844166	0.287285853589297	4.2935759598807	0.794523572842805	0.0991376983259366	0.540186872955605	0.174330798224019	2.18551034633414	3.31267287292277	0.407376694820581	0.00772568354151179	-0.0295493734241555	0.260687119200563	4.01450131432345	0.489786186949079	5578	0.3842
CD44-TCRgd-CD3-CD27	clade18	Blood_C57BL6	-0.0391816809446754	2.86429261486772	0.404230870241506	0.0689685606307972	-0.0118655167504467	0.0606159364937291	3.47500972421122	0.313943826595623	0.0267908237162786	0.0982799108093541	0.127449468548954	-0.0416221053085542	-0.0312116400883365	0.0638122823086979	0.471136060309187	0.0610913437271294	0.0698647239038083	1.83508696146782	0.296712448348738	0.0304936481622207	0.0335763169089156	0.177635728455389	2.08231809145997	0.363958520315603	0.561418374590792	0.36025029828207	4.17965110494962	0.635977796096288	0.0726777763573182	0.296786069989067	0.147476620830729	0.276552381409674	1.19372034312791	0.240235601295403	0.0450305049094288	0.00809176190701296	0.286814696951515	3.79612519653246	0.502593705433536	2664	0.1835
Sca1-CD4-x120g8-Ly6C	clade19	Blood_C57BL6	-0.0333628846317221	2.67003891631118	0.445637365645196	0.0991128693941564	0.983021586553583	0.1494031674867	0.0672259172392021	0.118364955612934	0.019767710742742	0.177264152332516	0.257514728283954	-0.017466776753377	3.63111713389089	0.79517962512	2.6938858019263	2.86533289364492	0.311955360198819	0.0110477306469958	0.781126262476604	0.0526267846004583	0.0218042740305022	3.14133354334269	0.529328300703536	0.229290961453472	0.0871062825799354	0.526546852533725	5.00437633029852	0.507630790914682	0.105289794322184	0.0488031994273018	-0.0187374529554129	0.00478176359852705	0.264324134103663	0.120178400651811	0.00442109591021071	-0.0333562092574624	0.555369684663014	4.18829608364501	2.06503793602819	3674	0.2531
MHCII-IgD-CD16_32-B220	clade2	Blood_C57BL6	-0.0423761352774274	2.06865736215967	0.460027032204169	3.02983320708352	0.159198572172149	0.0730018684361568	-0.0164723316581001	0.063810308339742	0.646160910048641	0.116315245784319	0.215258356825779	1.28996038883316	0.0418128917188148	0.0246103593557671	-0.0117378197041357	-0.0420351563518057	0.0590945670560566	-0.00525900678636478	2.0946200508914	0.485849506974592	0.0306560337067534	4.17070320126406	0.417138673575043	0.117360835561428	0.00453697059521203	0.145422182142255	1.34227690346918	0.311494315151195	-0.00422298484649898	0.306193247507351	-0.0165546523102326	0.00768443225457126	0.0361422980929778	0.118819316448369	0.0900171665297846	0.0486376636574686	3.33841369355965	1.19729846884446	4.66239240437793	561080	38.65
CD45.2-CD44-CD49b-CD11c	clade20	Blood_C57BL6	-0.0428994204495952	2.99684331286818	0.255226382599891	0.0536792251643534	1.45489510787946	0.0896825715068325	0.00889155880739411	0.995395554832133	0.0393141005499636	0.121024782170929	0.0847686383952857	-0.0489020156117026	-0.0488949027318928	0.00260179844513446	0.0741652927619279	0.00582240876062363	0.26689816615548	1.93576733759825	0.861352480830796	0.0762848450089164	0.0856076486764057	0.360113622555356	0.247440483018105	0.321694387550245	0.0144678001945469	0.108616704533442	0.336443415222391	1.35134032917968	0.177470196912219	0.184271064722385	0.0132836619252405	0.0915053078533591	0.436413340873585	0.343188805715976	0.00291779350419588	-0.0201765640025646	0.350630127232791	3.61644340288914	0.5180945709275	4041	0.2783
CD16_32-MHCII-CD49b-Ter119	clade21	Blood_C57BL6	-0.0478560017730222	0.908953381030046	0.199419248198671	0.0407200302547609	-0.0295238081565733	0.0469057885451284	-0.0300780497619975	-0.0203170524660371	-0.0544547832550309	0.417644544194393	0.0471993787811695	-0.0477746713424592	-0.0585965346875279	0.0152294029103186	0.115017066321438	-0.0306922555928956	1.04551220085758	0.231388586022097	4.61120560650289	1.47970287368948	0.22202367092162	0.0367500856963165	0.10175888640432	0.861849277855394	0.0415951401624972	0.0174148046852586	0.125392107993712	3.22521909523164	0.217868441215478	0.0909847821766717	-0.0324818940268399	-0.00992625629856728	0.912291885343201	0.0817337504914195	0.0746549789075868	-0.0289363814923001	0.25236635250306	2.62447872617407	0.259784862969917	2223	0.1531
CD4-CD45.2-IgD-B220	clade22	Blood_C57BL6	-0.0183332369399282	3.02869472064666	0.694962365981843	2.50681774734386	0.150502728122902	0.151958350218562	2.57993484400854	0.294835968835092	0.528356577067009	0.20589622744269	0.3353777933237	1.04166039236203	0.041673949249042	1.28221154321097	0.681692675834492	2.85676842483355	0.390808076511852	1.89230466923692	1.7229053801907	0.372365073174749	0.181873532428207	3.60829237552796	3.60288990394697	0.446221032696815	0.0768464533205755	0.434546615612016	2.34773596969066	0.405630140967199	0.047470863344538	0.395083177178169	0.108321238119921	2.27023663796877	2.01851176008027	0.365905222646305	0.102694831201131	0.0565191494321954	2.86913723813018	1.80335844916756	4.1508261899203	2392	0.1648
CD11b-MHCII-Ly6C-CD11c	clade23	Blood_C57BL6	-0.0431598275090376	1.25437661249971	0.239636028734988	0.0471627710111427	0.657417141062329	0.210777111967774	-0.00617139571330507	-0.00918606837434905	-0.0449008428883763	0.524345784325924	0.242904945895986	-0.0137789041665912	0.0690247539293563	0.00335123105021552	1.04786075490459	0.0267962375913531	2.76942320259484	0.259260149748957	1.94987012937095	0.368010138076052	0.0628090738774754	0.105945335414281	0.336924550572627	0.0759193975833769	-0.021343382203513	0.04725164207692	0.218671860149376	0.295964474704746	0.137730011513463	0.143279474147407	-0.0182408365552429	0.018990528806127	0.701617157738164	0.462693746479755	0.0720671422218575	-0.014115501207152	0.378482778352276	3.31983424646618	2.9977474011113	2665	0.1836
MHCII-CD11c-CD16_32-CD45.2	clade24	Blood_C57BL6	-0.0337807928795123	2.51436576180367	0.51986148986555	0.0998152069363748	2.07645086260032	0.630239517830488	0.0864194838134087	0.0807010153148785	-0.0211498822915082	0.474706223507321	0.420507336037627	-0.000616681468767857	0.0423316898238977	0.0858006655271205	0.260210521290599	0.782970153587044	3.33228187221358	0.304019648716516	2.46607870389548	0.42798005140638	0.218791736044553	0.22147697380404	0.529764770039323	0.239840557887968	0.0349110040923944	0.255521876470613	0.645466164886296	0.468328287495597	0.250737693972658	0.254405520995394	0.0326329255197393	0.0864647018463644	0.502108896607806	0.737849958401821	0.284048610979221	0.199763107843264	1.5786413791021	3.50478417602556	5.64624231737942	2819	0.1942
x120g8-Ly6C-CD43-CD11c	clade25	Blood_C57BL6	-0.0458423480129342	1.22791944314737	0.247802746774689	0.0445393034474597	1.47685554124988	0.101203604328093	0.00723310817263261	0.00260413017878545	-0.0395195179103472	0.449028875165869	0.209208322459567	-0.0399485595650197	1.38190644340036	0.112570158715962	3.03460428760282	0.173843299252376	0.821097652939516	0.181910752534303	1.39355725874252	0.172580454070716	0.0645823334329317	0.189936188237532	0.305672148402483	0.0627563310971591	-0.0273361963965353	0.0386042012900628	0.560845173309979	0.370005165095494	0.0581355699691899	0.148177982121146	0.00871298078191034	0.0331519578512898	1.30710121927765	0.220656281593722	-0.0133614659413759	-0.0402161969047647	0.275805052312724	2.89050946638421	0.551290482996891	1780	0.1226
CD27-CD49b-CD44-cKit	clade3	Blood_C57BL6	-0.0384639938434618	1.88438442144844	0.137753344041292	0.0506823891169654	0.392472604221054	-0.00750134784008516	0.0180696526945071	0.308896384390079	-0.0286459965933599	0.0597677874172097	0.00248975991781592	-0.0306221057793528	-0.056932993919551	0.00977051093301678	0.15612173558262	0.0411236421343986	0.538810483373065	0.807052695164307	0.486685067328213	0.059899268972434	-0.0051131320186478	0.37782035292403	0.196024763495413	0.109909059041269	-0.00256350804434803	0.0477838766079152	0.187724295001894	2.09319000805775	0.222837278106239	0.244700715469859	-0.00562888767091964	0.0815924903177227	1.01143067401396	0.132704961017459	-0.0194667463025399	-0.0505544184180804	0.273676543947969	1.60686167839903	0.284319259631477	3311	0.2281
CD43-CD45.2-CD44-CD11b	clade4	Blood_C57BL6	-0.046275431099192	2.34582917227108	0.196903452277791	0.0362919308844514	0.724199717688269	0.0182260957508034	-0.0183187541869283	0.688624542493523	-0.000132969843960087	0.0281966935061833	0.0333226892120536	-0.0536012949500767	-0.0605137508830113	-0.0204692694607164	0.585068143979281	-0.0143920003168431	3.48479782836926	0.58624801206364	0.93565009389373	0.057606585082206	0.00206896202673801	0.141924068915364	0.101617281094628	0.139844108804847	-0.0169178154644704	0.03232100496633	0.0908025070081463	3.14677322247284	0.271077802922856	0.150402760751501	0.0584330039716966	0.0276311266287304	3.44729882406282	0.390800798835967	0.00612522350705924	-0.0418539332661497	0.107417379108633	1.67028439797656	0.110921559918009	57266	3.945
Ly6G-CD11b-CD115-CD34	clade5	Blood_C57BL6	-0.0232122142505239	2.68012302389763	4.33087628531565	0.723462339011133	0.386933736260381	1.87079533974221	0.831749167233872	2.13763421748692	0.694711762484574	2.03744954020614	3.17461010418794	0.383489805673524	0.290684144275164	0.614134971943778	3.67287964787342	0.407917613801117	6.02880957180172	0.753921822661014	1.99757706126934	0.334951931873086	0.00369162991546568	0.0614547914380326	0.0631782541758117	0.31986994474743	0.0442537084909694	0.302908173312319	0.532529908745627	0.181939454408592	0.0449667459312503	0.209826306643956	0.0996310805974661	0.106534731559734	1.55200185821158	0.427632863627859	0.0490085086725128	0.052057637607473	0.497270004906489	5.20657059845201	0.899758390364355	202215	13.93
CD45.2-CD27-CD11c-CD11b	clade6	Blood_C57BL6	-0.0436738102428663	2.83016620429175	0.231833512810716	0.0486935684740887	1.0031434257269	0.045638498271413	-0.00770774892307885	0.791500982642392	0.010905949574787	0.0519553565315532	0.0577694937912815	-0.0512875200217955	-0.0594129290937301	-0.0134425500493241	0.149237322206562	-0.0285552082317522	2.23003614995133	2.16845810335973	1.31742258597655	0.118807666547242	0.0478791232585058	0.752401681969064	0.230496693407843	0.221342671840808	0.00123695000184412	0.0622726655342375	0.128200302385861	3.80228958600157	0.350003602147071	0.143967334818264	-0.0173839250274243	0.0325307148073561	0.900374678897634	0.230757446985471	-0.0144724499725873	-0.0383562540294672	0.201418414572234	2.50580508191447	0.219424991196425	11933	0.822
CD44-CD45.2-Sca1-CD3	clade7	Blood_C57BL6	-0.0352262380828343	3.02977468818848	0.430807881745257	0.0733666381639785	0.00186208005280347	0.0662173065644789	3.01366186569495	0.272634112527209	0.0181653739503864	0.125383971526653	0.154561796447291	-0.0317430642814217	-0.0176678971579926	0.0887455936674488	3.23557983723637	0.531281997107112	0.174948210001099	2.29329892354442	0.370264584497175	0.0556854642930468	0.0745379096175575	0.163281126071882	3.19836324632611	0.432413642392918	0.0942767047050275	0.246580521329096	3.97802745496784	0.713975619362105	0.0807397573738828	0.316003630120272	0.134112924076016	1.92964324356144	2.36252067050645	0.348916498684429	-0.00126024956463891	-0.0294822125493986	0.247227097462518	3.82367594585686	0.483253479738021	4565	0.3144
CD44-CD4-CD5-CD45.2	clade8	Blood_C57BL6	-0.0403358970651431	2.56111571915914	0.395285174525394	0.0701824803457772	-0.0292397859882438	0.0594193795571084	2.93461446217612	0.244335913738803	0.0139805029668874	0.0900600758025517	0.163134347183243	-0.0408994904444592	-0.030849938634199	0.0542449388211385	0.455203892387294	4.89233628124967	0.524364066274041	1.84240445899753	0.213300403943842	0.0165157497192421	0.138410667040058	0.0619778581674038	4.13877489792826	0.416992074239146	0.027506678217028	0.357672568321452	2.92677853777544	0.323566068532966	0.0193658883515811	0.223204935659084	0.0999416689263762	2.59551655011644	1.46879377102531	0.205948994271202	-0.0279889067347838	-0.0442472113542612	0.227934979675072	1.63416258258485	0.215682278465935	223485	15.39
MHCII-CD16_32-Sca1-CD19	clade9	Blood_C57BL6	-0.0435393194127744	1.61709368758356	0.349003759409867	1.1282137552588	0.0111286709286545	0.0344818094123319	-0.0217256013685051	0.0314150614731886	0.00401378189852935	0.0805053918312666	0.178411332587222	1.85796899677218	0.104431537178892	0.0138793615697498	0.0214352368671563	-0.0330202708761421	0.168257248749402	-0.00222708809223321	1.61912520037668	0.227214396368115	0.0321576934792608	0.728935160198416	1.14274105991508	0.173277632336845	0.032584358042031	0.48251764564023	3.15212065185464	0.451923319986409	0.0313241944751461	0.191076496438703	-0.00222639227507696	0.0142398502563832	0.921516478726071	0.15817520405374	0.0963395876761993	0.0681157787077247	3.78989164444226	2.68953665933013	4.65957966482393	6247	0.4303
CD8-CD5-CD43-TCRb	clade10	BoneMarrow_C57BL6	-0.0362181153487342	2.02345803418298	0.23751560467882	-0.00420134465008648	-0.0396184237723862	0.11590352185593	2.33260860730485	0.200709601855526	-0.00909792164103793	0.0612032610737264	0.180696461527871	-0.0414841814922735	-0.0491409420566182	3.75702402709987	0.596703880925728	0.130784489418262	0.0478040062243859	1.93806862577969	0.32994207610881	0.0379698717174212	0.052961559696816	0.0279720380861442	3.29708802412408	0.394865815454986	0.0341610410299381	0.480538982067475	0.498721207481429	-0.00708240318009508	0.0274348594528102	0.0955701811907853	0.0467016128151696	2.422649025681	3.34311305677258	0.497973917456864	0.0238905544760507	-0.00263034065317482	0.0336336096094882	0.210927383426826	0.307517629472307	14768	0.7552
CD11b-CD43-CD16_32-Sca1	clade11	BoneMarrow_C57BL6	-0.0378107851873667	1.59793100051357	0.239008904307935	-0.00367728662679442	0.709437766809383	1.43317241764756	0.0818454236733273	0.0275269988146079	-0.0382893690853853	0.0897209879506344	0.685100833837693	-0.017688376857323	-0.0382327268873966	-0.0292125524064423	0.0967242990668224	-0.0146657727955399	3.2486346691723	0.254880309142973	2.86696055364738	0.397945610667459	0.0839129668508474	0.0885813837338868	0.115808666047258	0.284208953550759	0.03195543721434	0.0499061131700543	0.532670808230059	-0.00769257749514938	0.114649292701778	0.114197322986916	0.17977752313374	0.0867798743637375	4.55143042138819	0.981950402923412	0.128296197251213	-0.000455305900523221	0.118157020371743	3.44429797076823	0.566316806482969	13445	0.6875
B220-IgM-MHCII-IgD	clade12	BoneMarrow_C57BL6	-0.0324733615898909	0.820532603098123	0.212451710547316	0.0531818213367765	-0.0573398008292092	0.0781763979729045	-0.0388332530080652	0.000969805376111096	-0.0294605823936625	0.0456140524953051	0.123742563098665	0.592771851426019	-0.00803780262675779	-0.0392292223439272	0.0223873747726005	-0.031705389719944	0.0610394178756112	-0.0117365546871147	1.48010357410226	0.130210680339458	0.00527620902847251	2.0556734291552	0.450168607387795	0.0774203512077232	-0.0334797047592553	0.214074710700276	0.15072679557883	-0.0276511608458839	-0.019346445042753	-0.0125179323800118	0.176290299593564	0.014914288185934	0.166745276072309	0.162065566881349	0.180380619657774	-0.00172567531511216	1.75881712956068	1.81380735012206	2.48016744241881	184052	9.411
Sca1-x120g8-B220-CD4	clade19	BoneMarrow_C57BL6	-0.0325364508413377	2.1699819941901	0.341964188549066	0.0246255305328721	0.861737846080563	0.288055067225645	0.0710446855586602	0.14927114914963	0.0205023823535641	0.238817476228939	0.403805382566413	-0.00824016251981361	3.51097943099423	0.740063449085017	1.53953229943435	2.44401174179695	0.295289770784844	0.0712661735915675	1.05384124148402	0.0949722292733058	0.0420023700708039	2.38982048076946	0.58259652556142	0.331423218168479	0.108198856958956	0.655892890102431	5.37973148849161	0.68603988591753	0.15071110698238	-0.00153814228594193	-0.0281870779241652	0.0112730600766647	0.417849863368302	0.245833886162133	0.0314594062660438	-0.0231106723768604	0.187590221646118	3.634087719833	2.42551152341035	25455	1.302
MHCII-CD16_32-IgD-IgM	clade2	BoneMarrow_C57BL6	-0.034159934179355	1.83395725771584	0.371303011596932	2.64654825032474	0.124875207895562	0.221030775453566	0.00123015641792758	0.124505170291968	0.43000821179875	0.160687002694917	0.417083052936646	1.21164053055311	0.0468449056176658	0.00618202128093143	0.00875585712474523	0.00832684928307392	0.0991480864571314	-0.00113549619493523	2.12206283668248	0.476875029953708	0.0362652874933117	3.90103561143481	0.417789692880319	0.191738831623246	0.0124189025533932	0.192464019669565	1.65146465076614	0.0785581518808258	-0.0175114163915062	0.171383953617339	-0.0207550879827652	0.0244451752812326	0.0588122589275578	0.334177748703813	0.126651346006603	0.0936581680452412	3.37977644833119	1.09731499024229	5.10963822721672	146036	7.467
CD11b-CD16_32-F480-cKit	clade23	BoneMarrow_C57BL6	-0.0342775541939684	1.64922737457999	0.300566869097844	0.0110215982162154	0.377661563795418	1.05836423825419	0.0709752521023938	0.0642675053395313	-0.0270016357268529	0.474054371158053	0.621423045772536	0.00446539683779967	0.0412920967675246	0.0055566614596864	1.25187977519525	0.158536180032809	3.27226630010966	0.366862072065177	3.50030412173939	0.683018226674246	0.137539835711827	0.0868001258039559	0.355185180306749	0.16539901614467	-0.00981912311109845	0.0882498015221016	0.352003847517782	0.0151272933629051	0.121132879963097	0.0196349252286663	-0.012268178534144	0.0598659331245688	0.560618612169737	1.60253838043532	0.322299120815005	0.0755051611635847	0.627111445122929	3.25982736785092	4.38751371994231	13649	0.6979
CD44-Ly6C-CD11b-CD34	clade26	BoneMarrow_C57BL6	-0.039225970885885	1.18815007037304	0.268646200605971	-0.00478578328262604	-0.0380544884204474	0.75764887089691	0.0237320745619884	0.027183820232548	-0.0426769398831333	0.717903699320346	0.589821517270397	0.00219946931698215	0.0199813117969729	-0.000700847562846279	3.91918643849735	0.311003049738993	2.49392316740396	0.19329801591928	3.30417506795616	0.461897038524377	0.0863741893752432	0.0333132979482389	0.450400704576445	0.0885073902095317	-0.0325226244702084	0.0597308274449317	0.142505380678071	-0.0229549436256091	0.00395205703691638	-0.00898227580871707	0.0151743393002719	0.0345830125286444	0.486089026277646	0.826077612748015	0.12705176258644	-0.0136720279269136	0.144158622953032	3.99294061769147	0.675317548677658	185644	9.493
CD115-Ly6G-CD16_32-NKp46	clade27	BoneMarrow_C57BL6	-0.0331965353717476	1.41814648229302	0.980926489098107	0.17598360310073	0.0730114692562952	1.1653865787179	0.240293885844326	0.651600690771335	0.147548649115782	0.687015363246918	1.41585170616943	0.0791027828046794	0.0534935647997711	0.195762567326063	2.67637667597723	0.363290514330933	4.51804298207859	0.461662261841054	3.12801623301983	0.598904585193124	0.101137009544395	0.062508186469477	0.194346151972713	0.177374968736044	-0.0023169102876877	0.13416435735233	0.258353689704312	-0.00130269742774735	0.446224598265853	0.0978854523963999	0.0695635603672429	0.059313259718321	2.69407016519892	0.910879944284428	0.131890360699404	0.0145590559914393	0.197154967256065	4.35521999992361	1.07538033649922	240767	12.31
CD34-CD11b-Ly6C-CD27	clade28	BoneMarrow_C57BL6	-0.0323758619344411	1.34801554825066	0.346531579759275	0.010213849339034	-0.0391353342797989	0.433624576739325	0.02708982885159	0.062583942137117	-0.0311895850880772	1.45573397374844	0.499869620150546	0.0351237265444221	0.152263057515975	0.120905696653513	3.46898390931855	0.33428549227811	1.88237862190904	0.903315458690006	4.08607036066773	1.57258039637713	0.256878015353424	0.0454126595144133	0.522324399453243	0.1078111868581	-0.0220244815156313	0.101349862108255	0.209354012455504	0.0166917392760204	2.47394945870307	0.226435033523273	0.0712351269467289	0.0495156309596026	1.37145314786799	0.473787395658414	0.122891665462999	0.00299325149435129	0.248850453556938	4.35273743175229	0.927967733558842	50162	2.565
F480-CD16_32-CD64-CD11b	clade29	BoneMarrow_C57BL6	-0.0239594440518741	1.33409591115904	0.45687767794004	0.0218593176771948	0.0136810584371924	2.224843939759	0.190298641715115	0.143816877153333	-0.00718642141919702	0.565844737610889	0.484049605598413	-0.0014947284471808	-0.0235713289542969	0.00946107887754683	0.757902302017685	0.274235741981785	2.77878156017972	0.284811644377787	3.96971071224599	3.14096287932208	0.528738864001551	0.149965698138187	0.197555287186625	0.165238525940289	-0.00588103769392215	0.145752131989478	0.11820118793005	0.195335116608878	0.0582704492838963	0.0349145423712625	0.0188680850053	0.0620472032613825	0.865035274066105	1.09647114150238	0.192627728497372	0.130960763741912	0.30702513432948	4.4390781544611	1.2353148312888	75286	3.85
MHCII-IgD-IgM-CD45.2	clade30	BoneMarrow_C57BL6	-0.0278324351017375	2.73767361812485	0.332709772804528	0.231325806900029	0.122773962841669	0.33929087574285	2.32778131604876	0.241009874242281	0.0452155140390649	0.157395241808258	0.3273407906729	0.100419038949893	0.0105377806894906	3.73207606244492	1.69036519705905	0.274052731615372	0.159173090099197	2.34264321615928	0.796409043009595	0.132526277242491	0.111918226517105	0.417270819617743	3.6931975932458	0.557996578506559	0.0871658168600282	0.379464459652359	3.61674335153501	0.457934192420774	0.0878681305293669	0.225833230471383	0.0627814637231718	2.1527180004371	3.31951121933374	0.651412803786646	0.0654484005102677	0.0119906663602642	0.397572301126033	2.34369224481748	1.35817581528856	2605	0.1332
Sca1-CD4-Foxp3-CD5	clade31	BoneMarrow_C57BL6	-0.0287568272157292	2.59396193564456	0.352509692263232	0.101632296897841	0.017178516228547	0.449553566971121	2.58487550158772	0.267723794183947	0.0388705497934939	0.175118364081775	0.387042218287769	0.0227802409667131	0.0221042998313141	0.0690518146440326	0.901306437967382	4.53649393486236	0.560895144261008	1.84119434990798	0.609216195725462	0.113678503299405	0.492810685539519	0.186615504659734	4.53673774441603	0.612234070335216	0.0809600541381093	0.31916636723966	4.77956494566713	0.666248936139338	0.0530304489410384	0.293054506632352	0.149947331386346	1.74278241434863	2.13952540270756	0.493534154162292	0.0189260930110641	-0.0145689907778888	0.162469257400374	2.81288176052158	1.18062156119466	6618	0.3384
CD34-x120g8-CD44-CD27	clade32	BoneMarrow_C57BL6	-0.0418761736420042	0.980975314345456	0.257248811571004	-0.0118271059769095	0.0275675680263914	0.165180776504774	-0.0117509235018365	0.012700611645047	-0.0444306971714801	2.62585134300191	0.564695297550282	0.0536700843533105	0.226270294031097	-0.000655291612373664	0.314028558972216	0.144464499176081	0.233339668724471	2.60145547383929	1.41320360149382	0.254731203545159	0.0753420966709479	0.103199197516878	0.92520388288417	0.128539392681334	-0.0176149717216337	0.21656182045415	0.913438128547401	0.0903542684124051	0.581560360338336	0.0377492139975714	-0.0190816387206603	0.0466589500940366	0.932763610004723	0.345997825580328	0.355252796074182	0.00380620773474538	0.147600575652227	3.77245686838708	0.974497650219409	10720	0.5482
F480-CD16_32-Sca1-cKit	clade33	BoneMarrow_C57BL6	-0.0390649186826978	1.15924829536858	0.321548827305961	0.00350098727317167	-0.0155965771346573	1.24110332299939	0.0853338061775185	0.0637048789198962	-0.0281339354360014	3.14448169305297	0.676175407031226	0.0883551579506879	0.0323281497489271	-0.00145520460884268	0.198665275743363	0.507701337450553	0.422573938846212	2.8200850941462	2.52637724970138	1.29675467141564	0.241930400229388	0.105176987529198	0.593252689590742	0.213984226552329	0.00210951434349213	0.222164565435019	1.35811634555785	0.726153385282161	3.14292807626459	0.407287920968498	0.0790273208015897	0.0475451734285436	2.47943529121366	1.23018841060232	0.166852140784863	0.00367677019402743	0.187034320898548	3.09273055712554	1.46730571658015	22980	1.175
CD44-CD16_32-Sca1-MHCII	clade34	BoneMarrow_C57BL6	-0.0377952776672374	1.510385784258	0.268727363939106	0.00577361681046003	0.0258822242751923	0.403153851223062	0.0333811754031161	0.0560819668529927	-0.0373727039627257	0.288930438838156	0.220867953755008	0.18755424074264	0.280705261195422	0.0353900651291861	0.346175818428846	0.21654324730903	0.217165259985653	1.07024618586989	1.31695566711559	0.178969303029156	0.0550387048938973	0.391656277062045	0.539142479042615	0.23032129094298	0.0753945470432015	0.477798020748489	4.65947784518374	0.670748074663335	0.143222330021898	0.0195356264046632	0.420610186925374	0.0251914500395793	0.385025899545441	0.428919890770172	0.344003785508988	0.00678592157997445	0.274711712222383	2.47463132542281	2.03799625765844	4659	0.2382
FceR1a-CD34-F480-CD43	clade35	BoneMarrow_C57BL6	-0.0418859829773977	0.905903882916207	0.233602915286672	-0.010243681371676	-0.0156792911820885	0.362601798560998	-0.0131261029082008	-0.000884344456371525	-0.0533213802875521	0.624777823620417	0.167590458784896	-0.0368185630384223	-0.0340573392297695	-0.0239916469540379	0.385708958600662	0.0678619630736976	1.676106440856	0.284386011148655	4.49282253824613	1.28910790701197	0.225228777771044	0.0296195839627723	0.238497694435365	1.4566208979333	0.130405472469239	0.0602191656233953	0.0641134881337013	2.53619917006542	0.169239779453535	0.00717219463373352	-0.0262586591573206	0.00125637380093455	1.63055560368369	0.428580138058565	0.143302310368396	-0.0236002160292505	0.140694415954509	1.977713953792	0.549747775723557	14860	0.7599
B220-x120g8-CD44-MHCII	clade36	BoneMarrow_C57BL6	-0.0389987227713406	1.60216980707011	0.262801055942544	-5.87647553637467e-05	0.987341626433155	0.206910624031319	0.0231655911010852	0.0688813846829192	-0.0184678098617877	0.385969235582652	0.26451486831825	-0.0249040940874712	2.63901144794265	0.415692864945724	1.01217306796398	1.17144160392244	0.280628464928446	0.298003368550045	1.42789523353221	0.141132737204894	0.0626011341416907	1.33482909715092	0.583584634572518	0.201681126535765	-0.00441944395193153	0.164629770203767	1.31081426331387	0.0560741803852009	0.148240859397977	0.0248774930062352	0.0015113652691986	0.0733232369101337	1.05052940782084	0.388676466228149	0.133146264511444	-0.00152611144087623	0.193517258573741	3.36998328653179	1.58674661672068	21617	1.105
CD45.2-CD5-CD8-TCRb	clade37	BoneMarrow_C57BL6	-0.0329985989225042	2.6655512924667	0.272298571330973	0.0134090191833966	0.00635230160871398	0.236433393789149	2.14442574159405	0.270141595121277	0.00189412307779943	0.11218055437421	0.237737425600393	-0.0305764719994569	-0.0354834212123292	1.26084439787347	2.07342468062459	0.186930597855069	0.147829158140751	3.01403062328927	0.751089919218039	0.109076575866786	0.0829626717633824	0.117353814479859	2.91325616319807	0.480384758408528	0.0982539854858934	0.216291557586482	0.223337871269388	1.49886508629807	0.126316579420645	0.111964137863447	0.0742245527566655	2.13119264105917	3.19267172034099	0.675667290167026	0.0512269863362775	-0.00124981356805032	0.0957716812202374	2.93320955792055	0.79457099791289	24148	1.235
CD44-CD27-SiglecF-CD16_32	clade38	BoneMarrow_C57BL6	0.0204107720864895	0.595156243409557	0.406774471506808	0.0124319693789548	-0.0440463126597445	0.399210795333048	0.0367475854610682	0.0678444775333038	-0.0333399255095072	0.388231019359122	0.328610692626807	-0.0130051315536148	0.0889310743381239	0.00234455499359309	0.702944959398608	0.0883404957601264	0.188587521205934	0.280050664557954	0.530229364825231	0.531682478572056	0.15210020074377	0.168461420775418	1.65180463947873	0.189439426954128	-0.00586059068812774	0.22188812309113	0.268830849525806	0.205056652618322	3.8595178822759	0.620503614221169	0.0956402181723289	0.0530479608417877	1.34022958572416	0.410371864408383	0.0381318849207846	-0.0314407276307943	0.488111715089298	3.89465944705268	0.808533233205114	10376	0.5306
CD44-CD45.2-MHCII-CD27	clade39	BoneMarrow_C57BL6	-0.035094201646273	2.38084031791368	0.21433074486154	-0.00552487559799286	0.517329209723207	0.340333306654029	0.0244808180459771	0.623627773528879	-0.000630382315457897	0.0801986903517969	0.127027568420167	-0.0467658494639885	-0.0562411742572735	-0.0161897655144553	0.171589849336694	0.104138824321982	0.867758879122432	2.27961224421835	1.2691856461271	0.136240660305269	0.0472205871815222	0.729556132255083	0.335405655624234	0.324965280517134	0.0124780754761808	0.110419870611104	0.18133723700364	3.52382252642109	0.360243944381041	0.0870578633353266	-0.0127972792690662	0.0625780819222812	0.635718378212959	0.597193357553182	0.0335526683369588	-0.0076961752173732	0.120466952604825	2.31250244039128	0.914789342030459	11531	0.5896
CD45.2-CD43-CD44-CD27	clade4	BoneMarrow_C57BL6	-0.0407392182546633	1.784467190886	0.163655827104744	-0.0264130693060094	0.373512178893041	0.0780852871914614	-0.0279056443021629	0.413954493610585	-0.0276706611002086	0.00650270945389821	0.0544129796311876	-0.0576015324343993	-0.0640240664773713	-0.0423638711583587	0.248339490209226	-0.0158862642367146	1.84932699774822	0.683641846559908	0.985280442382094	0.0688221490518154	-0.00567001774616324	0.118528251623653	0.107214126207507	0.168416573687339	-0.014934376852187	0.0410808137022598	0.0508484361984535	3.07699814499636	0.266657800800983	0.04596655789221	0.0188882248151115	0.032925323577834	2.80343078718909	0.390892741386721	0.0124932688748878	-0.0283694733710102	0.018528186633395	1.49728557272764	0.246642614711859	3130	0.1601
CD44-Ter119-CD5-CD16_32	clade40	BoneMarrow_C57BL6	0.408507879180034	0.537655247329198	0.304598105191641	-0.00888597925125897	-0.0392725899270729	0.12918882171313	-0.0129998748222877	0.00529625732923001	-0.0527806334110809	0.149240519464984	0.169482389093458	0.000585515044942057	-0.0123807613319478	-0.0279655137860313	0.585748582568039	0.00239480249568064	0.158978522775765	0.0253934235362639	0.247468770063018	0.0167668859140706	0.0170423953321219	0.116291061407715	1.16885662151841	0.0817757296741824	-0.0331214773228434	0.111765613155004	0.159225758343393	-0.0114661365659331	0.300150732470084	0.00159328412963573	-0.0338191039275696	0.0211808441633672	0.413321410396601	0.186445518984223	0.0188116700797488	-0.0493531364199271	0.240613254711179	3.0286373509065	0.480444317499472	24120	1.233
MHCII-F480-CD115-CD11b	clade41	BoneMarrow_C57BL6	-0.0144274837865958	3.11541530590764	0.781129266964823	0.12200102704551	1.94933971117525	3.22754474874335	0.469462258468659	0.336922315067202	0.0747733996976343	0.515762448227679	1.22947879781723	0.0594431387058968	0.129881039784586	0.130060632717541	0.529728200432006	1.1386338826314	3.92617298300948	0.62064663357211	5.4393384398772	1.16206641040301	0.248853648208844	0.188118619838599	0.216977526041051	0.344585151128205	0.0502473184428173	0.164792997825673	0.942289626859222	0.0824741760586131	0.0816927813565351	0.0983992437922835	0.0222563405723395	0.188406933013761	0.377407567174353	3.36916910884959	0.889799292885625	0.345138296440334	1.92709455646499	2.88751821872291	6.4862459591472	4014	0.2053
CD16_32-F480-TCRb-CD64	clade42	BoneMarrow_C57BL6	0.0919096108332046	1.63011118534568	0.860973761627365	0.0536610873691287	0.222368143899844	3.53384489056211	0.408108551009392	0.182677911270332	0.0117535737586748	0.293985935991467	0.592107833692111	0.0472305057472013	0.0507019093364485	0.0346590394702864	0.349764812595925	1.81855820515763	0.643633308825922	0.115206305344653	2.71074600662757	0.426664934035336	0.0984773426963732	0.514768196408767	0.489508880259516	0.295007010689147	0.0224282029942782	0.217967892475547	0.360155743515114	0.103122900973064	0.0562754065147446	0.0767116021781666	0.00263018633326149	0.926835344050558	0.331273297472835	3.54425146844915	0.650537987072585	0.104456268568901	0.854758440355922	1.44014171347837	2.38437330882435	10991	0.562
CD11b-IgD-CD115-Ly6C	clade43	BoneMarrow_C57BL6	-0.0188117215361457	2.11784859487684	0.777030936369209	1.92500756235872	0.234386161987672	1.11814024146884	0.181181483696142	0.395061275220177	0.376095830573385	0.718997621662397	1.12571836940437	1.04737218417043	0.175598329267759	0.139200471872897	2.3323605006032	0.33621973462696	3.2325600964459	0.392010491948649	3.54814765721756	1.07606017336167	0.197156862439076	3.28259790064586	0.600693912956869	0.356022044291229	0.0476569861005683	0.333562713408424	1.34151755321577	0.165552674916853	0.342575153864669	0.210811614748828	0.0866008931221719	0.134125296599312	1.67347652607685	1.03989020061695	0.311148746126506	0.158174732389312	3.29245953742846	3.92616516556865	4.78244878316004	1108	0.05666
CD115-Ly6G-B220-IgD	clade44	BoneMarrow_C57BL6	-0.00994170533777441	2.45409911744316	2.85153718315934	2.00024412664143	0.551837918570778	2.19022798064042	0.946157673183431	2.20490772985051	0.95856668151252	2.09367070400588	3.55087558114221	1.1238798100522	0.413810698371512	0.50745434160504	2.2519524298357	0.514487575831333	5.05813974810095	0.660314799739044	3.1366066190511	0.801438600785542	0.161719157965664	2.94065948432597	0.50382420863825	0.747198535205906	0.181759187894911	0.768495645945721	1.55220169596762	0.17381598337824	0.173598051300359	0.449893948184224	0.312916890391338	0.286394405967883	2.44752159416971	1.16157193512034	0.328856418348091	0.233044121449395	3.0052281367818	4.93656267352196	4.71449149505853	1462	0.07476
CD44-CD3-CD45.2-CD5	clade45	BoneMarrow_C57BL6	-0.0388270939256634	2.36815156224859	0.251622841289112	-0.00133895510075354	-0.0223220655256285	0.177483786120667	2.64489522112874	0.232158011598575	0.00319522484280275	0.0640056203861134	0.177271943552326	-0.0435410233037205	-0.0483933254422882	0.197606255579966	1.14955033881532	0.101326424683412	0.0827529826243742	2.61387341336083	0.527046746117641	0.071538228505954	0.0666933535820934	0.0954314470643464	3.04206889516573	0.422831078805315	0.368516738057997	0.269709421217246	0.674675437690367	0.178693461291282	0.0520184196308418	0.0751677295065577	0.0280056198739001	0.707567721318423	2.74141424338833	0.535263128126494	0.0275405503531155	-0.0173723458559184	0.0528982879531479	1.32149738384332	0.437041359840501	2646	0.1353
CD4-Ly6C-SiglecF-Sca1	clade46	BoneMarrow_C57BL6	-0.0257719269670564	2.76317418101387	0.294845797748829	0.0226297547502436	-0.0141618419699388	0.45840990963768	2.61173921146958	0.229985893978026	0.0152764047740955	0.146355353009429	0.275444055609985	-0.0225047380263176	-0.0234092813276051	0.0299756626700276	2.02949535527784	0.4847376634779	0.187485434019834	2.04932614641955	0.682815388398103	0.0892054315080608	0.0819251321075123	0.0843738347960882	3.26948516498932	0.605951966010917	0.208110321823273	0.323630727115774	4.08100302044872	0.774498834003782	0.0781675134703799	0.21623505665093	0.0862528987171176	1.53675434278026	2.2240985413252	0.714388427323794	0.065777799335188	0.0138208193280248	0.123354490406552	3.39972103724879	1.11201926583799	1445	0.07389
IgM-Sca1-CD44-CD16_32	clade47	BoneMarrow_C57BL6	-0.0163395664104177	2.08823282581904	0.879900732253588	0.112330279013641	0.0357427776578147	0.611370669397475	0.154172701199096	0.539501247374286	0.100446111072987	0.637075335878837	1.26360053214589	0.312759302256338	0.313837018431178	0.123838504722029	0.916296857929618	0.205165798734835	0.31007362583819	0.163630868543586	3.54767407693511	0.678232779845402	0.198862368462326	0.481067978746827	1.24384353724989	0.605997352507654	0.191061043831791	0.720520151891873	5.16404836835989	0.630052149383277	0.18151940987574	0.0902678005314409	0.173855459482903	0.0604778081557233	0.332912059295677	0.513125822425419	1.91400377889589	0.895231369655144	7.14949704078445	3.73717794350464	2.28978758804874	1647	0.08422
Ly6G-CD115-CD11b-F480	clade5	BoneMarrow_C57BL6	-0.0273482195724935	1.84688515086528	2.75233530795542	0.759912055725841	0.427894046164154	2.09181997866994	0.920354754028149	2.17335133638496	0.764785631733894	2.05273759278143	3.4890939581125	0.418994511945427	0.294779391083053	0.468395305640023	2.28244642705744	0.401719365679788	5.03031720403448	0.651895816723775	2.71885120819574	0.60562809772124	0.087488152842439	0.196598650826982	0.203757109815791	0.663387357997461	0.137890830385192	0.633782250798852	0.697616994979671	0.0961637922475348	0.164440019277317	0.33271793031364	0.248415292253253	0.214110991877606	2.52806168876735	0.942304883383074	0.150146932328227	0.124572133877856	0.507964635729001	5.00118185564196	1.11813918449741	814563	41.65
CD44-CD5-Foxp3-CD3	clade8	BoneMarrow_C57BL6	-0.0331519424246652	2.08772621338599	0.255639750779741	0.00775026236282101	-0.0306295976880257	0.16305519529615	2.29195655033493	0.181086334142358	-0.00309202478772793	0.0949872537553339	0.240536857024119	-0.034895164160068	-0.0214798975899236	0.0271518536810297	0.206647284789232	4.45681732640227	0.444711572098566	1.91688169953206	0.342922083766517	0.0520378470789483	0.52883698627146	0.0407182132163939	4.3129588505727	0.485794004096655	0.0304709313650121	0.279189771612255	1.45587226065093	0.152804435638443	-0.00928307464930806	0.301448000941327	0.506440471059299	2.30474173685229	1.07884627950318	0.316734005082612	-0.0152340766861959	-0.0221646515809616	0.0507423198931279	1.26437820154923	0.51321296771756	7550	0.3861
MHCII-CD45.2-CD16_32-Sca1	clade9	BoneMarrow_C57BL6	-0.0313158326828075	1.47203725520477	0.318810992518874	0.954845047934084	0.000994486435148726	0.263555381746794	0.0031042497459253	0.07945826999651	-0.00362411201918184	0.125285100510878	0.352965035263343	1.89317693851132	0.111195919895937	0.0145284292648898	0.0517647461026699	0.0368516322103156	0.168279261148365	0.00858623913316883	2.03570742659075	0.291106896811055	0.0540393839994551	0.795401785485109	1.05296737782441	0.231990884132751	0.0386946611394786	0.524164051621748	3.58508712188924	0.332866012634906	0.0379476949529204	0.0464300872405857	-0.0102873520935509	0.0276218742232931	0.786334690877541	0.38333241967278	0.13554059304403	0.0979715586157909	4.05400635068492	2.18516549813878	4.84005879317083	3582	0.1832
CD11b-CD44-MHCII-CD45.2	clade1	Colon_C57BL6	-0.0875474351852202	2.66010441785461	0.177008096526184	-0.0177064360212523	0.84085628334441	1.52692822341614	0.153972973003764	0.153365404888918	-0.0104606508170444	0.603229862591065	0.668144606012407	-0.0056790046840738	0.00874711373031148	0.0110782345476105	0.264220636296938	0.00271327645479102	5.17288449575705	0.729806013453116	4.03291224888374	0.629711042432311	0.104662134573046	0.0158624555441885	0.134787575585149	0.176628390831027	-0.0134456480039069	0.0912732208835892	1.03895708111604	0.390411060662664	0.0140977261638509	0.0157801570905519	-0.047586723946928	0.0261711706591686	0.462184212005074	0.476733416042035	0.339527323806378	0.133119508073648	0.89591437254789	5.5260126045817	5.40101383759932	2076	1.628
CD115-SiglecF-Ly6G-CD11b	clade15	Colon_C57BL6	-0.0907855704101372	2.17356324498339	0.457776723594233	0.0500902661984758	0.151863345595452	2.02117230565859	0.254714251283476	0.360892596870831	0.0611948886492002	0.80003367074434	0.79108997462039	0.0260348928090725	0.000811562402585007	0.0524838923202025	1.01457817145955	0.0696913724810638	3.72901014085555	0.348368366672801	1.75214315474113	3.2214844680989	0.605630793972792	0.130806653814395	0.0927450211154302	0.16226069764115	-0.0191324643681969	0.156507436665275	1.14836428655944	0.30064973409047	0.0224132536800973	0.0175172780233739	-0.0161892907483198	0.0324315789528726	0.591487006703002	0.405223481637375	0.127777841541946	0.0870355256881336	0.167299014516888	4.91635473829917	1.3962968765392	6932	5.435
MHCII-B220-Sca1-CD16_32	clade2	Colon_C57BL6	-0.0986702281382541	2.02687512797924	0.117352495601528	1.16192450421762	0.00122046145973987	0.0615072803961901	-0.0282343209216057	0.0799500885562465	-0.0347898119872423	0.188237644752322	0.371578076965611	0.329436555807607	-0.0303332700339914	-0.0189838376945851	-0.0399560613555867	-0.0571093300728261	-0.0169392644580552	-0.0621758918968608	1.59681710713336	0.218471930388764	0.00281287920459128	2.67174590104204	0.289917447475176	0.168429984304048	-0.0112747649982468	0.17645951536816	1.86595828324701	0.147265974769978	-0.0203389268940736	0.0687033508576344	-0.0411958271600389	-0.0114550642771379	0.0137113003374282	0.215911677723748	0.218274239598745	0.166429122608762	3.09895223732626	1.49698955769109	6.14395901004494	31559	24.74
CD16_32-MHCII-IgM-CD45.2	clade48	Colon_C57BL6	-0.0873458969365558	2.90055776072971	0.431924687407733	0.0467233480915464	0.972998674106417	3.2779142275782	0.572651902359986	0.359684673514754	0.0558151926957147	1.57632194245547	1.10653305916179	0.066059451070679	0.378494103055318	0.0907007654598281	0.406034736834605	1.60631350014237	4.69673478849027	0.893092793608893	6.12911696685112	1.52560922980938	0.195853638369438	0.0611924219578218	0.101319704918912	0.108731599844933	-0.0168482518924698	0.129896002207401	3.15614388710763	0.340890030945796	0.050429488792779	0.00615321057079539	-0.0364470203184074	0.0157976348534541	0.0995806661772121	2.83701025938448	0.824819555496238	0.262914542283212	1.57230579369881	4.02908056819989	5.98057727531977	35515	27.84
CD45.2-CD43-NKp46-Ly6C	clade49	Colon_C57BL6	-0.0972838504060174	2.51450276704508	0.0412548912555836	-0.0628391479289561	0.0173872094908044	0.000343772697584112	2.30784715820465	0.203821234503894	-0.0315722494902269	0.0816991614478873	0.138297844479685	-0.0688065299206559	-0.077725956604817	0.166620269365416	2.78247780998099	0.143920507455356	0.0589291522729892	0.173175160217157	0.038096635719645	-0.0392506923058054	-0.0145178757990026	0.184427080425189	1.79542524901014	0.28776122240998	0.0096744867912005	0.131625783258988	0.469742019435629	0.419206669827363	0.0239673700649552	0.0265411856697137	0.00067438966231164	1.77217253244434	2.45736571993296	0.388997866527643	0.00189730823371843	-0.0382954412283224	7.7118565989853e-05	2.89118391580122	0.43534073573792	1326	1.04
CD11c-MHCII-F480-CD16_32	clade50	Colon_C57BL6	-0.0881826898178801	2.64889611577188	0.31175720177218	0.0163325659800392	2.78305073857056	1.21160630316081	0.223864458510748	0.263207896034557	0.00909450480421152	0.68407433552149	0.854652463985358	-0.00337931162791694	0.144410462532199	0.0729588085196751	0.113469975541997	0.191456075393154	1.82658563148496	0.197390627917475	3.33440155186483	0.83138620450349	0.425858794437857	0.282392808395789	0.651208809508221	0.428969999466034	0.0787970914090319	0.374997749565815	2.1563558036574	0.396256777368781	0.185818689150894	0.111720318864255	0.0260140901008346	0.0918555877850743	0.336717038212617	1.31455551714988	0.703311541366996	0.581646862578235	2.20093584154249	3.99236585844284	6.83711267552936	5067	3.972
CD44-MHCII-CD11c-CD45.2	clade51	Colon_C57BL6	-0.0953788667943738	2.06880264199534	0.0197370583637296	-0.0708269699201335	0.225558644791204	0.00167063103802453	0.0415304387726508	0.238059920626636	-0.064833506281059	0.12093165261414	0.0747370306901048	-0.0749072697065272	-0.0295413834543314	-0.0220141743198158	0.0388635352162466	0.628918784228847	0.106375003867167	-0.0111775729695104	0.213927958140094	-0.0323855401795358	-0.0350304897248411	0.198326439400563	0.201743816833491	0.154430351700825	-0.0366390774800993	0.0865414818857205	0.9091800808755	0.270871060873557	0.11025305943212	-0.0241280298901588	-0.0165562351556621	0.0532586888123341	0.187388779907929	0.165758636216319	0.0118239631210999	-0.0416329832810627	0.0935250593627848	3.38435672493778	1.09318863141224	3998	3.134
CD3-CD43-Sca1-TCRb	clade52	Colon_C57BL6	-0.0984568459688079	2.41659145832634	0.0427825648507132	-0.0688991508660834	-0.0266243475369357	0.0150986618838616	2.96963426826267	0.235874116504876	-0.021364907651299	0.0825316820960448	0.127352733103717	-0.0784407330319957	-0.0875255710329003	0.606509347884717	0.0331819292355514	-0.0374401172013929	-0.0457025901494163	-0.000578426648567617	0.0081029953997112	-0.053413235962372	-0.0411845686506257	0.726349333012604	0.686605891043967	0.234600188299773	0.094836829933826	0.0959770632524869	0.659622353249033	0.116620055822773	0.0577517469005541	-0.00288138630221085	-0.0691510981885592	1.69493074717131	0.586358280370749	0.226865347717993	-0.000495672465547296	-0.012163525782036	0.00997244080321031	1.64005021054065	0.18704863896349	17032	13.35
CD16_32-Sca1-CD34-SiglecF	clade53	Colon_C57BL6	-0.0972124266042999	2.17885956667444	0.0359313047377676	-0.0691291338994229	-0.0624324438896879	0.0202444106582987	-0.00731653003492682	0.0158940430070017	-0.0764391971235609	0.247255431980744	0.149736934375447	-0.0726301632107928	-0.0475623399344974	-0.0272325230953844	0.0600331118199883	-0.0479334463405658	-0.00290515701002215	-0.010829946828618	0.21153422920454	-0.00751845970568713	-0.0262529499380707	0.0353874858802515	0.232987839494884	0.222608114346683	0.0268827889022463	0.357498487371716	4.54462078351996	0.585052315640986	0.144561492143275	-0.0200090395077345	0.0793766708166697	-0.0217485851300637	0.119089766330925	0.123306773998817	-0.0211146659992831	-0.0548871363374967	0.0320656641515307	4.78530251042643	1.31031350376812	4916	3.854
CD4-CD44-CD5-CD49b	clade54	Colon_C57BL6	-0.0981174671100917	2.10693337118275	0.047388187736212	-0.0590572099465609	-0.057087235432142	0.0213657089225186	2.45363281698508	0.178993497784294	-0.0297292678093786	0.114952549166165	0.188311516267707	-0.0711713648638954	-0.0635633599290256	-0.0215565673732027	0.0700042703610847	4.29686507460957	0.451344349363525	0.143711764983044	0.030943895650826	-0.0256765589433456	0.331187294628992	0.00916871897778574	4.1253506394368	0.49845302794947	-0.00868988023015646	0.191847652810319	1.58399439667096	0.0885121741950061	-0.0329615447052341	0.0602321434819647	0.00170058258887803	1.98534608514846	1.44011158274159	0.198933268363566	-0.0198729482783658	-0.0555980463153631	-0.012963588486121	1.84281825200779	0.609865944038958	2349	1.842
x120g8-Sca1-CCR7-CD115	clade55	Colon_C57BL6	-0.0946323902678217	1.8446217612729	0.212917140820364	-0.017735102943304	0.061664291707277	0.281681591238842	0.119418626016543	0.182641321593103	0.0343011772560629	0.450860667917356	0.602004575205318	0.0090862010803086	3.28923139085821	0.393132386724616	2.60503160638432	0.316555037625802	0.139871770564056	-0.0300586023268695	2.10631802507294	0.246299229286325	0.126622909346016	0.06883259583273	0.538786446717691	0.24003217121665	0.0682243630838184	0.48291755103278	4.30137583818584	0.587169939051291	0.198502241779489	0.0271198202703271	0.0454076211874174	-0.0151333350544364	1.06410822949805	0.275218649441111	0.546032836308135	0.0756862667242181	0.652064834630957	4.36144753048143	4.47700519926174	7587	5.948
MHCII-Ly6C-CD11c-IgM	clade56	Colon_C57BL6	-0.0929945098045685	2.17212344595223	0.16403182877194	-0.0250034077254108	0.681589257371536	1.0555816660393	0.0988840422050342	0.124365565844731	-0.0355797395570694	0.54615351956501	0.52527168614876	-0.0143426206391743	0.0614197129063847	-0.00893008493061052	0.789843611181612	0.0882105159561145	3.68914646228624	0.392621985586281	4.14823686730611	0.857269402931771	0.172953973923706	0.0340738480410467	0.153717989633979	0.153112465330231	-0.0113708456604434	0.110405572501558	1.2561655910819	0.201004186854909	0.0109922851900451	0.011616611327174	-0.027819563980693	0.0196969587472721	0.214642328595209	1.06619376388844	0.452382813331602	0.221832975706144	1.41416448972053	4.03730184995925	6.11914832368377	2583	2.025
CD44-MHCII-CD3-CD8	clade57	Colon_C57BL6	-0.0988498257770732	2.26226821570827	0.0867075571218769	-0.0365787996279192	0.0166342418136592	0.0929278065586958	3.44384199697866	0.318194120249673	0.0241884048322057	0.142429784144285	0.268629877655114	-0.0655056508812315	-0.0689401187100704	0.183544195669003	0.0192305496794313	-0.0450975148510446	0.0371290304570986	-0.0452807311608458	0.122500971112495	-0.0194425116675139	0.00467190673771734	0.205449426760899	1.66289675785942	0.341434306479585	0.585716079178322	0.223981457835226	1.56742147555968	0.171618768558377	0.0540934155584927	0.0765860120792394	0.0253027490846668	0.410189104250929	1.39738309881165	0.307757558651306	0.0596121052642437	0.00192592305800166	0.118475837503524	4.59345483952421	1.81950301569373	1282	1.005
Sca1-Ly6C-CD43-CD44	clade58	Colon_C57BL6	-0.097791204454978	2.28571836002081	0.0393186534485262	-0.0687971086763577	-0.00928686813213069	0.0119905846874903	2.38693213394409	0.158015753925465	-0.0460525087112072	0.103625079564324	0.129918734976316	-0.0705215952674099	-0.0672814328214101	2.21310026387351	0.767008703154164	0.0388689257261158	-0.0128305818794986	0.156427889369206	0.0241068384720463	-0.0273627559734989	0.0326010499285371	0.0139222224170216	3.23834589119268	0.403799032003735	0.0126189567319039	0.29484010434723	1.93091470043238	0.187529909088032	0.0196330785995243	0.021675570010285	-0.0149447035233517	1.90223622988103	3.04554507222138	0.376597310132183	0.00220880615307109	-0.0413984726903915	-0.0198796966302244	1.32028751717611	0.267103201139793	1802	1.413
TCRgd-CD3-B220-CD45.2	clade59	Colon_C57BL6	-0.0979861981155055	2.43480515648917	0.118176435500677	-0.0428763162137478	0.215388242607219	0.110655671129661	4.29611130946628	0.504191853498992	0.0394872851042714	0.102087089608853	0.211922216933414	-0.0702495603681957	-0.0801473742875947	1.24062631353401	0.0142115570952042	-0.052579917293178	0.09557872464839	-0.0190183768443346	0.0218025091592726	-0.0369445470074704	-0.0119801013221173	0.686210781792293	0.811898476897863	0.349774528934205	2.57006357971397	0.427456840591236	0.62386863237146	0.114651842855698	0.0767867383491714	0.0130377268470619	-0.0670125728011193	0.0708230799330985	0.261439348133912	0.248887268081405	0.0419968037823823	0.0333235569986652	0.0642402845151118	1.88134669999667	0.274905038279417	1091	0.8553
CD3-CD4-CD5-Foxp3	clade8	Colon_C57BL6	-0.0988671469825193	2.28704118135626	0.0717913647284881	-0.0502313417813669	-0.0446149434986557	0.0558979639353793	2.37611483832748	0.204909723092424	-0.0215718104979269	0.17808367594382	0.26613203507085	-0.0634018968785362	-0.0352383314350061	0.00355881254104125	0.0576854125930394	4.37212419313538	0.507746429713	0.080488830891745	0.119498109012944	-0.0037695747663404	0.537492387061324	0.0475383647866898	4.27722261892846	0.603521540442597	0.027380526274394	0.210910731729079	4.66474224482883	0.411594202045664	0.000187992128419579	0.0928260785474284	-0.0112902075863668	1.44832726982329	1.30421319983629	0.165855494810019	-0.0243176625432261	-0.0643540302136069	-0.00271190716455537	3.51414029720395	1.02685805888618	2249	1.763
TCRgd-CD49b-cKit-CD64	esc_3_1	Colon_C57BL6	-0.0952949718245896	1.60504658559511	0.107692553938066	-0.072212457670361	-0.0769449843212106	0.127330694451605	-0.0486260184472124	0.00382521870295354	-0.0623648601946633	0.182724492331764	0.124459689948893	-0.0777203968019083	-0.0821655741557685	0.0905429771986544	-0.0316593505591944	-0.0765341118234942	0.132055477650252	0.018667588920751	0.637937606943684	4.90325283410877	1.52945779385062	0.118602849926748	0.137896743055314	0.00902538855941747	-0.0861631446583545	0.0344897529612548	0.816604609887911	0.987732884459733	0.393843094547647	0.00529563411961924	-0.0601041008872685	-0.0425673349367278	-0.0258507883171962	0.055839581107089	0.261307531561119	0.102107429609069	0.113267917199484	0.150898448201086	0.0202038122998208	191	0.1497
CD8-CD27-CD43-CD44	clade10	InguinalLymphNode_C57BL6	-0.0268905950916348	2.58696639735915	0.350317632440547	0.16038041871804	0.00582090371269193	0.0521075232850095	2.77297596261468	0.249178197579923	0.0427514370393653	0.0544174172644656	0.0610671034141029	-0.0133468043374828	-0.00408263872292194	3.48298791629538	1.31701440777731	0.27595305006845	0.0494353877818094	2.48224761220534	0.479149290183774	0.109408413223334	0.168620360670982	0.275021329297249	3.63018544402088	0.371257312783143	0.0673539428798776	0.394810803043782	0.755982340781613	0.0748508122070688	0.062261914759521	0.0996152181914443	0.101941247779341	2.40311062187477	3.40446108103024	0.438861334119204	0.0788005634844194	0.0158093077740722	0.0807723941307314	1.28482357695914	0.506664288023749	420763	27.98
Sca1-x120g8-CD44-CD4	clade19	InguinalLymphNode_C57BL6	-0.0231247275097398	2.21528023490529	0.494717316251114	0.252457163282979	1.70880344814789	0.238296475798254	0.290536332603009	0.114093075171402	0.0679904428648276	0.18467738658455	0.232527826471684	0.0496559187328033	3.79019623027493	1.55568537272621	3.40655315798637	3.18531674416509	0.449761761680182	0.137359440905405	0.919106915429163	0.11407103804861	0.157033674846948	2.30893650478042	0.660473069307195	0.189279390505777	0.173308413373739	0.90565851084175	5.55620342144966	0.837320398924713	0.254340607056052	0.0243619847126359	0.0144154719155003	0.0893692847323906	0.488256517553413	0.0727030908721991	0.0476865208228458	-0.00869267851211705	0.173118312353233	5.20416471830023	1.88390313223397	6458	0.4294
B220-MHCII-IgD-Sca1	clade2	InguinalLymphNode_C57BL6	-0.0255572807599402	2.33436832402311	0.428063751762961	2.96893844097678	0.219400226531192	0.0785661655510278	0.0719738921211753	0.0274420931335373	0.437012762834704	0.0715406027810248	0.0801305745533422	0.928231975305795	0.0497298618733228	0.141905920686189	0.0235593899096176	0.0835690022652481	0.0133117382321967	0.0594654297178855	1.84838409581574	0.569018114652343	0.0894503793160245	4.03652185459845	0.568126753529807	0.112238456146556	0.0193213109778752	0.166927034347446	2.05343171362542	0.122167091771092	0.0117846847163502	0.188856205048335	-0.00705129325429195	0.089799816964331	0.149556003076428	0.0903348817841075	0.141874501637678	0.0599545651077893	2.93300688918356	2.00781448856377	4.12233681837575	596265	39.64
CD4-IgD-B220-CD8	clade22	InguinalLymphNode_C57BL6	-0.013246125303737	2.99413370988243	0.656267442614983	2.57838641556314	0.207857832507288	0.133711104943213	2.66175618545316	0.256276405383391	0.362055680383939	0.121319679460394	0.138587775724037	0.690979525368041	0.0673874511615364	1.70666356365253	0.674533634627467	2.41265028602999	0.322769611938662	2.01269613980851	1.5490797658587	0.496354043450182	0.360175415858262	3.39952966759037	3.69060311503596	0.435423057258434	0.0966833650400186	0.420309895153736	2.36922399388552	0.190926516569457	0.0569869911848224	0.226019230965027	0.111411335622549	2.15444704416895	1.98407416975781	0.312485023607799	0.159470414043645	0.0692672891756043	2.34496255922203	2.36834590755331	3.61130724051661	3378	0.2246
CD44-CD43-CD27-CD45.2	clade4	InguinalLymphNode_C57BL6	-0.0227197101167663	2.75969839172024	0.300376713070155	0.165709073459448	0.853873079044208	0.0770590452790776	0.134411974962853	0.834069262803338	0.0542511035303377	0.0575166544281419	0.0402590247854043	-0.0196388846951489	-0.019125124843491	0.163484954619307	0.186995413599195	0.279668696946638	1.14890083341188	2.13920475407685	1.12370256927829	0.157618347443247	0.126616072108701	0.965404167753216	0.370098269990961	0.124006848308528	-0.00342989061081586	0.123583000968586	0.311576979477505	2.73933877083561	0.314592514941573	0.0690703930856834	0.0393681203179851	0.148457496935684	1.27019523341902	0.244753333965312	0.0629135553030454	0.0116802717680054	0.150602066186519	3.77777128908564	1.15644688487777	7865	0.5229
CD11c-CD44-MHCII-CD45.2	clade50	InguinalLymphNode_C57BL6	-0.0151764816447479	2.94334215265143	0.481425066963564	0.271516505716541	3.25302743825473	1.39671299001603	0.404929805398914	0.0811120377695837	0.020301141377787	0.221405511529353	0.27914778163463	0.0349033988144359	0.202688416717933	0.446868735457466	0.229784465671724	2.67207849696187	2.46282047109131	0.344945831876709	2.11893374087898	0.37517058469354	0.50853758187213	0.582745623057001	1.16582804441649	0.154362226098596	0.0367257752342904	0.339921477523707	1.25958277138094	0.10681519282526	0.496172933804985	0.112653268827035	0.0436049751136349	0.300437761921625	0.541938495255754	0.44821740858144	0.308551536766777	0.153532598029898	1.12782398604801	4.22017760058046	5.04336756851016	2932	0.1949
CD4-CD8-Sca1-CD5	clade60	InguinalLymphNode_C57BL6	-0.0238558467830163	2.96985743784842	0.512781976863268	0.234845210091238	0.047207074319236	0.119618149353523	3.03111268484234	0.304576136876887	0.073438757263934	0.129934311031235	0.161362712938381	0.00998462556472383	0.0788749771537681	1.02518143924155	0.297899788835445	3.69312725331177	0.494217411297165	2.77928601603691	0.69241663448897	0.210609091763878	1.73220899469478	0.354587170529865	5.13124060242918	0.684685030189426	0.137262132376977	0.450296921972752	5.10668101582787	0.70653078984602	0.0794338969389328	0.315633486696061	0.537430347888548	1.53671198781219	0.728913636440106	0.128777923588381	0.0149042211479935	0.0590924125349777	0.116886379650532	4.74027332004802	1.31942596335565	15994	1.063
MHCII-TCRb-CD11b-TCRgd	clade61	InguinalLymphNode_C57BL6	-0.017602810613689	2.49247364283872	0.491830227857374	0.248585802530643	0.119732893257727	0.169882949876085	3.46349133100943	0.404966830441607	0.0934852918884935	0.11344821393322	0.131215098783048	0.00438660297603878	0.0573207820965228	0.325657365905585	0.156025874746645	1.09492785369495	0.657018243796131	1.55758008557057	0.595961315803713	0.116048730029705	0.16140904021265	0.504875227366309	2.49409963381707	0.301245916978106	0.569417241896109	0.499746406197531	3.49880008499409	0.62950474882033	0.123406809010277	0.272429597259358	0.375348100622881	1.46936207745544	1.17996566348768	0.297015217004935	1.35444375186241	0.343385381002205	0.413939579860449	5.40657235873457	2.06503263810653	7721	0.5133
MHCII-Sca1-CD5-CCR7	clade62	InguinalLymphNode_C57BL6	-0.0118738129561015	2.91624264781497	0.86460546811513	0.392091471358705	1.96144567426045	0.839334191880756	0.635945944449871	0.189829416104331	0.0633423757972427	0.373362784657913	0.458221179994945	0.0967903634020297	0.583271103942729	1.10910226224436	0.451904763448238	1.70607557743749	2.75299159238839	0.632504769142043	3.72864002548089	0.856487861391804	0.466438012926756	0.543246415954868	1.14184318334641	0.249238784600338	0.218555446348638	2.39123834850906	2.81332792788598	0.361424349867955	0.168737849690312	0.519286859226323	0.660145350634126	0.466768046019394	0.690977975389533	1.16954860315675	0.837792208214215	0.570169704019464	2.56948634026328	5.79463177409123	6.61344542194731	5604	0.3726
CD44-CD3-CD4-TCRgd	clade63	InguinalLymphNode_C57BL6	-0.0262263512554166	2.22314357379719	0.440878472896498	0.210718851642006	0.0437700908761946	0.135058073659126	3.90771559820143	0.468284515099555	0.116956207821149	0.0811778568465188	0.089956286243891	0.00220021164516766	0.00327998211974303	0.222114472176597	0.0417965953815509	0.532863924857744	0.216636623708031	0.211210797436301	0.200726369983409	0.04314436604011	0.106797294059233	0.411856152243407	2.33608114989826	0.260895394108552	1.0205771870797	0.276933169740259	1.42265441714033	0.186318405899216	0.0447866491582618	0.165474462010692	0.458504760750143	0.433545413254686	1.15473665896281	0.219701617197547	0.862428039550509	0.343296928541601	0.331517009538926	5.31847397431149	1.70992860131339	1236	0.08218
B220-SiglecF-MHCII-IgD	clade64	InguinalLymphNode_C57BL6	-0.031447109846431	1.96214773424258	0.0579813287252463	1.41715270344521	0.0400013506133963	-0.00364140997680642	0.00557023748127914	-0.0156539289317046	0.121893792740856	0.00374878348911215	-0.0040073559563803	0.396792898171103	-0.00886371445989843	0.0665277059878461	-0.00693209519273263	0.0476807504449089	0.000476309845775192	0.294262897446395	0.494180288452796	2.40172254046052	0.142373087913671	2.21415976273996	0.220607938465472	0.035985202294715	0.14880319250339	0.0692830746465397	1.15639456414545	0.0684278805539036	-0.00802276364456023	0.0670894521824707	-0.0241338033282552	0.0426790627400932	0.0797027134899287	0.0500686660710345	0.296441616199106	0.0336268339243594	2.2112468963164	1.54924614387659	3.36260862650892	15056	1.001
CD4-CD49b-CD27-CD11b	clade65	InguinalLymphNode_C57BL6	0.000411085839181256	2.80942290360732	0.447612698406887	0.291032115579909	0.567212181606694	0.350530946672001	0.236747150286659	0.706128403839733	0.0653847725778333	0.148004223753928	0.150484481500672	0.0242664410135278	0.168419735272816	0.452351121088663	0.606157057020073	4.02305665557651	1.87671477717738	1.55312710445067	1.10495757578777	0.143292179650575	0.0976333917869334	0.55421577519361	0.420718100635288	0.121136037812036	0.0227897872175755	0.261252625186799	1.56341186910317	1.63331793296471	0.356648899199022	0.0846746435825741	0.611769406798597	0.236332629348477	1.15895080236137	0.491402631025031	0.606802336695412	0.119322755353206	0.670997826898513	4.950734780683	3.40470160179798	2027	0.1348
CD44-Ly6G-CD8-Ly6C	clade66	InguinalLymphNode_C57BL6	-0.0158373651397603	2.32346002374802	4.48322680040422	0.431692180618802	0.204176819198752	0.715530480512634	0.335941640118374	0.745966261309127	0.183389023228488	0.742309119036151	1.20322628701879	0.159480031436712	0.123564963191003	0.622036520035122	3.54507830336363	0.611179051979035	4.57170774020117	1.18850189297732	2.09054465797516	0.609617440868636	0.133579439073118	0.267370578811993	0.230317097387259	0.196013590842337	0.0296972237255802	0.233025345078215	0.983720446900461	0.0592123008435584	0.0624547253953909	0.0915267174265184	0.0810795123429995	0.185783898858155	1.54725852965245	0.339601494708384	0.141256348535953	0.0969057210392569	0.416778956624523	5.87642155533822	1.73800733898848	1252	0.08324
SiglecF-MHCII-CD45.2-Ly6C	clade67	InguinalLymphNode_C57BL6	-0.0109512246802269	2.42604758506851	0.459403241697702	0.26627501723229	0.388771344291253	1.7543019063591	0.31954949475535	0.0753869985423933	0.0154112043570613	0.43787930034355	0.625912897371125	0.0661231081330366	0.285466168411433	0.280700442313103	3.33294251672265	1.01658167273806	3.79239432430595	0.432120956814588	3.14450897566315	0.917298868812238	0.246495418748859	0.307159995363146	0.380778772662677	0.0815829167398432	0.00345348140711901	0.192589830716991	1.30236882982962	0.21738391683023	0.0591609306885892	0.037366824149452	0.0699637538322951	0.197674223122938	0.750670599530662	1.42511796898837	0.319572584720167	0.0928901558681469	0.467712477250784	5.21289475643313	2.30699751744693	4507	0.2997
MHCII-CD11c-cKit-CD8	clade68	InguinalLymphNode_C57BL6	-0.0236550227184987	2.08995761754284	0.414562687005945	0.194015758186399	1.00331718908811	0.177024303905676	0.264930749175307	0.0931677362638663	0.0157369039266976	0.268281019071926	0.133527663261148	0.0324790303299442	0.165149376634973	0.986830370591858	0.252189848659289	0.67902087653449	0.633291488804086	0.921098356822919	1.25544575206088	0.256154989047573	0.249814764999634	0.510437694492479	0.871327553904672	0.13672504472566	0.0476590452343967	0.585483341528156	2.06891572727221	0.47116338436687	0.711407852576313	0.144874546850292	0.222958889864994	0.261644030699719	0.616142482591609	0.297556429817682	0.364624173566855	0.171933218231947	0.762476521427041	4.51065643474581	3.60987933007047	3677	0.2445
CD44-CD3-CD49b-MHCII	clade69	InguinalLymphNode_C57BL6	-0.0223049768886033	2.84581945850663	0.375229188284712	0.186928021611626	0.547024407803236	0.0980022793703118	0.725291388838865	0.87787249244245	0.0789807658975067	0.0946387835488915	0.0884003310292627	0.000465840368281387	0.0115982165938571	0.278742443844579	2.88128898254148	0.798112397870328	0.564978339842987	2.78210202708024	0.913044472513985	0.141621368954233	0.126824607360901	1.02925764481822	0.589596848639678	0.149049422967578	0.0158029448750299	0.180264106529285	0.579161346791438	2.07723422400281	0.312732617461199	0.0661097040489152	0.116263520236738	0.554967777508376	1.55499538676394	0.333668183861839	0.0995570690193106	0.0654176311395503	0.293471341927105	4.5855246076795	1.74074517320723	1222	0.08125
CD44-CD4-Sca1-CD3	clade8	InguinalLymphNode_C57BL6	-0.0263035493858569	2.52145576989372	0.375355388108894	0.167592754259334	0.00678625212004166	0.055591713334909	2.96554522225226	0.262876076438355	0.0527209655826012	0.0535864809422506	0.0649471184997995	-0.0166608950759269	-0.00132141722024866	0.15396670576082	0.296070880557431	4.58298717153097	0.570678679874329	1.92096056644796	0.334554732046011	0.0877831421162334	0.381716226721995	0.236292529215626	4.25478175230921	0.469392230926173	0.0690764073883808	0.356584133170402	2.29786457187511	0.157528222479603	0.0236231860554755	0.0960453256951905	0.107858304025223	2.5522407221214	1.20116700991657	0.174780643008039	0.0215805309542772	-0.0205630812009221	0.0740408228362718	1.75947283493047	0.592115993227562	403431	26.82
CD5-CD44-Sca1-CD4	clade9	InguinalLymphNode_C57BL6	-0.0276919398020095	1.9676997874757	0.358156991606079	1.41075678776794	0.0643911533196639	0.0469588894170496	0.0759146277723491	0.015364734192081	0.107160313271566	0.0546065796344799	0.0765186004765718	1.26120492621142	0.0822597934342052	0.124655924361211	0.0387952342121447	0.11964419094022	0.0588449546068848	0.087674364988416	1.61945546355044	0.371957479702397	0.0828035328930159	1.73465774035399	0.942228422856461	0.105062446814354	0.0342027955016447	0.349677042459824	3.27201357037354	0.314331637789976	0.0684287168681247	0.106516782859965	-0.00462682720136965	0.101774495086957	0.657518431108715	0.135211349267972	0.187390397988139	0.0745907137014259	3.00472166671818	3.21148332556396	4.02050621899932	4668	0.3104
CD16_32-MHCII-CD11b-Ly6C	clade1	Liver_C57BL6	-0.091014938581547	2.15911951647625	0.16675563989141	-0.0315019670632477	0.0653295297082806	1.04537915891881	0.0339795953792467	0.00347225801642055	-0.0691966153019296	0.351127917929893	0.278274274861274	-0.0347997727362862	0.146078906038757	0.011209512347633	4.34615356812908	0.325481316144104	3.7219071471736	0.198600144917181	2.93730996216112	0.289303481210693	0.0230007757988527	-0.0121804594771275	0.17964402926006	0.0403556429598174	-0.0579591660502354	0.0162700353073329	0.698697064123893	-0.00984158228337047	-0.0415228780229017	-0.0333814462678976	-0.00135738369624888	-0.00704073336855955	0.342580987584237	1.06918868674875	0.165947073828993	-0.0215089525047843	0.238419770168341	4.57448085971735	1.45016154169036	37207	5.309
CD8-CD44-CD43-Ter119	clade10	Liver_C57BL6	-0.089914479835152	2.36589603327803	0.130974094811761	-0.0436096086867311	-0.0199865947009038	0.0392948217303357	2.43729416866095	0.152215546494441	-0.0425468363295773	0.0269133984583696	0.0750655008936171	-0.0775812782317657	-0.0540334173916834	2.84239170474529	1.72660286212443	0.115287536890809	0.0249940683539794	1.16986213980364	0.272276793961494	0.0157689573002653	0.0603141530864685	0.0220753055113146	3.52930932627565	0.290366617166396	-0.00473880168236381	0.211339748904599	0.913532970500334	0.148217817997686	0.00674085194494035	0.0401793845043112	0.0242596744140006	1.92239292474333	3.35915579061041	0.316408599103893	-0.00577933817198785	-0.0602500857068886	-0.0144007285672876	1.87515000663798	0.238834066485079	37415	5.339
CD11b-Ly6C-CD43-CD8	clade11	Liver_C57BL6	-0.0942511177328594	1.99184289115005	0.110452385906578	-0.0490919510703746	0.991595332451826	0.945893170135436	0.011238990695608	-0.0298880510857245	-0.0786598382910089	0.0688652136857769	0.150632855536988	-0.0756279971958722	-0.0201211657760179	-0.0428153141500867	0.327236766517047	-0.0562855458984414	3.59161997996777	0.213998084119819	2.32861697580683	0.233534201441137	0.0535947701852856	0.0133252575225303	0.0814571819771829	0.0977532391822793	-0.0366055792805219	0.0038538936918842	0.806026617155362	-0.0109815029805342	0.0836669831075006	0.0566334977505905	0.114612466498599	0.00391761270736713	4.30553949795318	0.630881608304462	0.0590334842935272	-0.0487453048648485	0.0269501091353542	3.98909423543095	0.569153020033048	10291	1.468
CD11c-CD3-CD44-CD8	clade13	Liver_C57BL6	-0.088097571801461	2.59874216797051	0.159478080244754	-0.0357785680871438	0.700918714705853	0.122092411604475	3.3189053714386	0.254494249698027	-0.016702800219698	0.0359104119239687	0.0780417919936607	-0.0789564804543074	-0.0590089387257476	0.900633551125534	0.114586863310201	-0.0131439623264003	0.00780129236199084	0.27537022245358	0.375171428082601	0.00598054013039086	0.0305612246058709	0.0948307510103782	1.15398213888865	0.200218205424608	0.273866155862759	0.093653573008126	0.71034511206385	0.191863636520841	-0.0138073457466539	0.0114208981534988	-0.0522590654380662	1.08868543908257	0.823047159282362	0.234369270040062	0.00192532158591959	-0.0528891589372989	0.0385836122224833	3.73195897656866	0.542378267548652	7800	1.113
Sca1-CD4-B220-CD45.2	clade19	Liver_C57BL6	-0.0874467047924981	2.35490544235703	0.220854287832372	-0.0125235610276989	1.07085659932514	0.185682006103337	0.0510222554489566	0.0935129861723427	-0.0143481487646497	0.169905026622038	0.261986130496953	-0.0478879792541085	3.74786045910374	0.762174584308354	2.78804721285069	2.50870678739141	0.208247551186527	-0.0327141522451315	0.669148707198077	0.0411548768910629	0.0220487774882999	2.23778160058758	0.470627029279944	0.17362959402529	0.0683618300217618	0.60643548966654	5.69415771748788	0.601923631537331	0.0886048732221844	-0.0496362968473166	-0.0577114514821794	-0.0360293335550307	0.28405602116731	0.0567793744479901	-0.0326032352516639	-0.0655597103064456	0.0751206123080513	4.75348873874737	1.99282916874433	33365	4.761
B220-CD16_32-MHCII-IgD	clade2	Liver_C57BL6	-0.0912959687714064	2.06151137750274	0.173861635138926	2.11078895539839	0.0329021820561485	0.0577837365667443	-0.0424319079580426	0.0165885376263437	-0.0136246779945316	0.054123734075253	0.134636252650374	0.483011425774123	-0.0237775798870667	-0.00272207171870323	-0.0460287550653304	-0.0632637214800808	0.0167212215253143	-0.0446082711583766	1.83285790832002	0.314153246134208	0.00687855008815864	3.81286139264602	0.356095981919402	0.0683538135864334	-0.0455926004730716	0.107851711270856	1.57304595990146	0.0206034859817295	-0.0493309880004342	0.0503621194453293	-0.0659129880271216	-0.0325240858418553	0.0356884055528369	0.101485290497919	0.0630329944188642	0.0236295897047213	3.23736921921339	1.62449087458134	4.6986215302078	118778	16.95
CD11b-MHCII-CD11c-CD103	clade23	Liver_C57BL6	-0.0915072018835672	1.90720275145226	0.115313717549373	-0.048344654100369	0.769315912956841	0.388663328168694	-0.00978972310388575	-0.0188285228902444	-0.0776982785162942	0.273561323020594	0.155569205979856	-0.0630987439171884	0.0593574157133682	-0.0347726231677208	0.75973551655584	-0.00435861701754351	2.97971924864422	0.186058023057287	2.6119252812203	0.384607998521869	0.0836434577544422	0.0211860685624006	0.236146284278686	0.0609545683254538	-0.0478216186776457	0.0484331668864949	0.668716532171692	-0.0147724965161071	0.00563549654269113	-0.0289213808743718	-0.0582064764468292	-0.01119646442885	0.625147642855192	0.501555354106888	0.119336537109835	-0.00150757025737911	0.421905498856372	3.98592724825785	4.18886909917067	3669	0.5235
SiglecF-CD16_32-F480-CD11b	clade29	Liver_C57BL6	-0.0789294632433859	1.86692222610657	0.32623055026176	-0.0242500230576727	0.0888606352321962	2.23387864093559	0.140971734487251	0.0740698145151811	-0.048289706190113	0.406916230515781	0.316996381379494	-0.0517775105599489	-0.0162331299350842	0.00104054678162794	0.961255665050865	-0.0142392671346584	3.80200120281124	0.271760995412736	2.63866092261908	3.42814444466406	0.481965392815305	0.109956702561321	0.0618228548458366	0.0382471459307799	-0.0555595191496017	0.0406539817575883	0.527178443891527	0.332959200408403	0.00545221804033335	-0.019394004404088	-0.0497219753113927	-0.00626699166988758	0.45164213014383	0.182282173584031	0.0639730435614989	0.0383869205836029	0.187343609512856	5.28235390358121	0.912454580027686	3412	0.4868
CD43-CD49b-Ter119-CD45.2	clade4	Liver_C57BL6	-0.0926886831688831	2.06507655139384	0.0493723997043552	-0.0585584380245029	0.448729195587825	0.000311843710130139	-0.0554929648803123	0.360322113333879	-0.0609659962556243	-0.021539903169319	-0.0228530335582972	-0.0890089586654952	-0.07450721872579	-0.0704546681284844	0.453849762220631	-0.0598860052583873	2.17414370823941	0.166562277936642	0.731455252464947	0.0208922118932299	-0.0193154222751414	0.0424484885083159	0.0434746055935108	0.0545801965796254	-0.0604613010929335	-0.00532281092298911	0.197711778074379	2.67514739493578	0.161583604210078	0.0110091352883368	0.0166081407656764	-0.030586662643595	3.65129780770603	0.291355280705069	-0.00477687989644551	-0.0730914541393555	-0.0414532181476871	1.91834348549793	0.104570854950874	9186	1.311
Ly6G-CD16_32-CD115-CD11b	clade5	Liver_C57BL6	-0.0764454618032919	2.46965533195369	3.31747813606191	0.523426959103504	0.312460240318766	1.59062403213978	0.639713475231941	1.7140715829419	0.509019321326404	1.66683561531777	2.89232995755428	0.274581293182841	0.283611109736811	0.561614149564741	3.50901974073941	0.318829592975297	5.29402332313133	0.594152839350751	1.71285072607675	0.479447783068798	0.0387444640443932	0.106548898478322	0.0805923686265263	0.345041217911414	0.0354618179062646	0.353722006029788	1.09461914903283	0.0375820077730737	0.0449719118621769	0.142433620461251	0.077119230804743	0.0782562602177608	1.46856107784457	0.427099707348025	0.0617387365396539	0.034882901916397	0.373950071694302	5.32686303986976	0.969977557552073	80161	11.44
CD11b-CD16_32-MHCII-CD45.2	clade50	Liver_C57BL6	-0.0771292352751907	2.85111352827049	0.367411060404837	0.0132809769681795	3.39415404468717	0.657501614531026	0.110657362821859	0.0949495212631713	-0.0332839700165886	1.25338136467958	0.516038206430967	-0.0134612029896785	0.1758598515252	0.207126823955192	0.15118073547344	0.373384089118436	2.12269932971844	0.1896006216715	2.99561207274922	0.70944936412923	0.406360345975933	0.166878591596567	0.596300420892239	0.263437642667573	0.0428852000480321	0.378409255439009	2.61689362562565	0.180540530381634	0.322459872325681	0.0485676820460296	-0.0308255598227616	0.0430619845394551	0.281268618370872	0.625777738089885	0.350622703693404	0.276040796607579	1.40104953533703	4.52442026337617	6.06803650633558	35241	5.028
CD45.2-CD34-CD27-CD11c	clade6	Liver_C57BL6	-0.087597047894745	2.55545492555018	0.0918654515942301	-0.0457205900340501	1.57307269863743	0.13675314222614	-0.0163058201712949	0.376412279572573	-0.0514784108251389	0.0915796178843469	0.0414272572275029	-0.0836039959533379	-0.04744961272725	-0.0380264879715684	-0.00321164426950772	-0.0158956304435088	0.218969005922185	0.551043189867095	0.716592816840432	0.0369990272898818	0.0782287313591483	0.14255280445349	0.222912812155153	0.165387764885849	-0.0387754413518763	0.080368294190339	0.656241702305792	0.384802857182476	0.0335498004246376	-0.0210027546731682	-0.0669789725583065	0.0220431305916604	0.27196683873117	0.245472279825312	0.00771541631013187	-0.0508199716959448	0.0603155353033236	4.01776787306816	0.652063273510687	14267	2.036
CD4-CD5-Sca1-Ter119	clade7	Liver_C57BL6	-0.0823363191212857	2.65098589390325	0.205744492964935	-0.0287996517060103	-0.0514566158878228	0.102156806637542	2.94104111334626	0.188596281435728	-0.0230165792293818	0.0759082462980743	0.13473980166977	-0.071863415258807	-0.0376036587355031	0.0503921610159618	0.70886679819032	3.01023751982968	0.24003960007494	0.302618491487651	0.24630445555057	0.0140913840982294	0.0814824645933728	0.0672118272996223	3.28800559920404	0.330830836228332	0.0219318407429362	0.188147449976718	3.92100855207876	0.382325740526437	0.019642216989724	0.138114537222316	0.00461651841695705	1.74338244346625	2.31587003082479	0.254724187466931	-0.0113452935562887	-0.0591010474899658	0.0166732757057241	4.30315833804277	0.609228265931852	68233	9.736
F480-Sca1-CD45.2-CD64	clade70	Liver_C57BL6	-0.0566690837147814	3.02093621391204	0.614628086700586	0.071183005116657	0.490936469341315	5.18836699112697	0.849643928246637	0.169391096150297	0.00514269238445893	0.447913241266979	0.584864110519786	-0.0296962220462992	0.983798804624668	0.0666799607292699	0.0986340709569619	0.305926154752558	2.2325519495911	0.197235630436514	4.46482204860171	0.859563061815108	0.22919493171254	0.849396440563611	0.367134937005721	0.530877985449252	0.163373628163727	0.479596731002446	4.60362815223622	0.491288155509855	0.0803151036968868	0.040229824999432	-0.0312865794873653	0.0949029091328425	0.14333791055454	4.12435429331932	0.95085958009427	0.144426506846994	2.30321991173423	5.21625480625712	4.68911515702196	168608	24.06
x120g8-CD3-CD5-CD44	clade71	Liver_C57BL6	-0.0616558385429683	1.69760984243391	0.420536139533134	0.270756081865423	0.0742271502757792	1.38087089446345	0.585178350748749	0.165111822879495	0.0261609474371693	1.19318249393013	0.431727140174053	0.0596875060862922	3.11848491302616	0.335342769600205	0.202614739027521	0.310464336476528	0.632498474609677	1.93933997274826	7.33342668774757	2.16976698933751	0.155697076721873	0.244420939665582	0.186727643352959	-0.0512069614122662	-0.0744410781074216	0.00655122626787258	3.72952437519869	0.130807622976268	0.230667797917715	-0.0515188131933652	-0.0831118560671184	0.0200248791991895	0.122542385925628	0.175614671107538	0.34987732645659	-0.0437913583934645	0.594772947852747	0.729432620404326	0.891913915181085	23052	3.289
Sca1-F480-CD45.2-CD16_32	clade72	Liver_C57BL6	-0.0621185574538787	3.04677590866518	0.672415425750681	0.0741846876061736	0.473987849444303	5.57507984332748	0.943195367566292	0.186210034275558	0.0193250065106008	0.426152018813092	0.597605385215258	-0.0333739783337558	1.59909050041567	0.136902242123512	0.162585585327839	0.363010963448985	2.32685723275901	0.208596752910789	4.71043298320682	0.906524192633465	0.227647597549665	0.891272502006557	0.42293318690364	0.575349608060953	0.406326261257679	1.65897636181359	7.13809187724798	1.21319024324678	-0.0194630877802349	-0.0710724155702869	-0.0921250438435273	-0.0686716720208213	-0.0429119261983796	2.83700659827665	0.236115674680782	-0.0396137123073304	0.616042273884507	4.08316690478843	2.5713483562345	4124	0.5884
CD45.2-CD44-CD4-CD27	clade73	Liver_C57BL6	-0.0901998600806968	2.35033898053685	0.0704209388897121	-0.0536412613918547	0.68308624297856	0.0243455567741473	-0.0468030817160038	0.397824114061859	-0.0543471167998717	0.00054518676001743	-0.00203807635748928	-0.087033475658455	-0.071005803808017	-0.064975325586615	0.0688201679854942	-0.070329964162515	1.26694155841307	0.931831433729139	0.939928780790368	0.0707496772841108	0.00830373329511468	0.458519978099275	0.140952841802027	0.100131446177918	-0.0531131238928181	0.0189157914583856	0.275739806811572	3.10398219776565	0.178473021046134	-0.0149491833577166	-0.0631173029727903	-0.024483482392913	1.07396359192261	0.137549174283838	-0.0212600012182107	-0.0678886051376151	-0.00621504002585108	2.81490686775241	0.242318979428675	7792	1.112
Sca1-Ly6C-CD11b-CCR7	clade74	Liver_C57BL6	-0.074225001681764	3.14446494041627	0.316097126776141	0.00645837158667189	1.29436333054943	1.36445243625579	0.167000022030731	0.105838450873267	-0.0381258110961836	0.653883442136146	0.505647450604477	-0.00647814047363905	0.840032078182608	0.118529064841366	3.99619119249329	0.365363145389586	4.35544231706993	0.385643703740016	4.48683794077025	0.621005126307027	0.138071513302818	0.0290020048556159	0.257217542772308	0.166702550094449	0.0410723564269841	0.315450802346294	4.71629430167869	0.413249905111917	0.0227887353084511	-0.00465401385879946	-0.0296556695939734	0.0214426885068551	0.328029752556842	2.17918635879116	0.409644588007449	0.087245601907909	0.813810307208455	4.95197048140044	5.15994792167474	2015	0.2875
Sca1-cKit-MHCII-CD5	clade75	Liver_C57BL6	-0.0690646882483388	1.83775188292052	0.105598688929546	0.0244591176921753	0.0201019676803698	0.0697237022225424	0.0242417502818153	-0.0279193028126026	-0.0881137792189711	0.0450355731628176	-0.0135742224187733	-0.0686676035085164	0.0401434710267456	0.0100167321305406	0.00288382776051013	0.0415821985280735	0.109005480394785	-0.00143569547313399	0.521060724545775	0.0174204494694288	-0.0213990659592794	0.363766440661257	0.281720997812016	0.0904291449360469	0.0268227834876647	0.113210499721528	0.718149312980057	0.144618733919584	0.13312131180696	0.0212146757565717	-0.0743287846069201	0.104202216563077	0.250612613575102	0.059514693695394	-0.00762593610327401	-0.0786324455162158	0.673689394257692	0.808758380779868	0.908708033636217	3481	0.4967
CD45.2-F480-CD16_32-FceR1a	clade76	Liver_C57BL6	-0.0318901162577992	3.11555887643266	0.838347959746887	0.106160111101118	0.524169607228271	5.3137824316666	1.03002761877612	0.241966355510378	0.0601510941119954	1.06622105625988	0.771966559021426	0.0101972465297694	3.09483169604316	0.291787748578148	0.205450431328636	0.337407253134314	2.31986568883298	1.65013179977214	7.34443945447105	2.08349547845265	0.18421215707559	0.126857777832883	0.0607731309969208	0.0462588310047894	-0.0371029381084477	0.0872614223501258	5.08991883928087	0.228690193384957	0.23492766937819	-0.035949749900309	-0.0759574595169608	-0.0433006961474842	0.00419780879762955	2.91273742719041	0.680589963129476	0.0267541970853408	1.29202506853955	4.57961335263294	3.79217572131624	1945	0.2775
TCRgd-Sca1-CD44-CD45.2	clade77	Liver_C57BL6	-0.0903661881451739	2.13682910202534	0.159090039115804	-0.0203468352349631	0.875881465012153	0.14582140240972	0.0177861973891712	0.0565336335358808	-0.0328982761842023	0.123032507104641	0.159777223821097	-0.0632531201451585	3.36315845744056	0.558709497889729	2.04360853584542	3.51961070359632	0.225861123000532	-0.0285958419447511	0.693174391831002	0.0312070117241736	0.00897242964078248	1.93094635553908	0.393690715658746	0.0988062057608205	-0.0360844667618206	0.0991754761934108	2.27007761418319	0.0870545959432911	0.158809943116498	-0.0156421398265195	-0.0169571803439237	0.011323339703917	0.676979060499875	0.166717670645601	0.0167146558676279	-0.0460192279333109	0.162459747136683	4.79824992843973	1.97895268520029	3699	0.5278
B220-Ly6C-CD44-CD25	clade78	Liver_C57BL6	-0.0918717249123522	2.0180247480429	0.129299695216084	-0.0401393884539956	1.10308363989052	0.116815921465344	0.0134897878046983	0.0247475680099985	-0.0477481181154051	0.110135729893196	0.137552560874896	-0.0657562761949838	3.27591163525417	0.416616808828967	2.37229611685062	0.410834451423787	0.089974564271816	-0.0392742443289603	0.858829183748452	0.057681923256404	0.0273649417013511	1.45567997949546	0.40029561814482	0.0766939533687387	-0.0487186557117437	0.082503781303619	1.56912062196494	0.013526330524165	0.142350737091208	-0.0251975726294205	-0.0207713015184482	0.00544594635092674	0.940943328166063	0.160310185320643	0.00148111133895946	-0.0536805534245838	0.0845997426711108	4.30500991298788	1.37785322217861	4107	0.586
CD115-F480-CD64-Sca1	clade79	Liver_C57BL6	-0.0405857215258972	3.64109090046796	2.31013597369782	0.363142786861823	0.670220499459975	5.08143135542739	1.01911463968226	0.788958811590526	0.198756912628866	1.12108949212222	1.79404915769605	0.129418213351633	1.28893811567195	0.34741367086002	2.89904638546415	0.551544643705398	4.75454983535608	0.517317063509049	4.42868760395098	0.857967570437898	0.216134556744949	0.716618796607427	0.345705068776142	0.605757488790143	0.189964010773836	0.592176286403545	4.7414974447082	0.557053742585719	0.123211623705327	0.142518368414659	0.02592250534396	0.127477641085522	0.611598427165156	3.93910272927161	0.897821321046189	0.23187171582596	3.13086453864003	5.64875621205734	5.01700509873093	1356	0.1935
CD5-CD4-Sca1-CD44	clade8	Liver_C57BL6	-0.0916828299957031	2.17605849790604	0.144897193013583	-0.0359815453328422	-0.0658392273804103	0.0356448509834593	2.8019060808002	0.148794521837951	-0.0325016727688902	0.026963435938107	0.0901518428871849	-0.0783130492145453	-0.0565763304498652	-0.010080773045653	0.222924593316992	4.51732241274932	0.350482161987738	0.871571501769035	0.164606067465309	-0.000421924445472823	0.183293003724694	-0.00533399737059799	4.30295773700008	0.332923450503967	-0.0199464768429868	0.258068324269525	2.12080775151864	0.0584504539077537	-0.0455942262208665	0.00149752341442378	-0.0430720461308233	2.23768574868542	1.14221273148949	0.107891442345818	-0.0425944640043336	-0.0776398959548309	-0.024250061587252	1.10551937156861	0.177964536482569	21104	3.011
F480-CD16_32-CD11b-SiglecF	esc_5_1	Liver_C57BL6	0.034300085112942	2.26053979354621	0.80976968175125	0.112812295120968	0.71543464751943	5.88046781058675	1.02175043139488	0.148006059986019	-0.00505527756363384	0.491931771222091	0.369728077856394	0.00376328497794133	0.200138570068243	0.070174004935302	0.586250236722781	0.0694601662155241	6.93369361735308	0.720154800641829	4.40865135209126	0.250229666516864	-0.0261504240460877	0.241782604641991	0.0306466683959877	-0.0515716491264309	-0.0892896828738632	-0.0575815733867597	0.395169125163852	0.0281366610926166	-0.0611295777729057	-0.04811979085822	-0.0826285665657289	-0.0362432707667915	0.124461099028422	0.556520994291393	0.205340861621245	-0.0510371291599608	0.504591732193365	1.48667921624378	0.470886698698503	525	0.07491
CD16_32-MHCII-CD11c-Ly6C	clade1	Lung_C57BL6	-0.128897860295385	1.92992419038174	0.278701543171809	-0.0999062529895194	0.144420002898021	0.701818096780404	-0.0193115139723958	-0.0628626885063526	-0.115456133333121	0.714636408554125	0.120846447311946	-0.0903179851759541	-0.0233204528250638	-0.0663596257634522	1.71920865661696	0.0363600722499849	3.0590495457858	0.169079290741154	2.56583509798132	0.307513840395861	0.0128885942390234	0.00955706005441744	0.156564314963001	0.0131376201286887	-0.0910080040957862	0.039501129159545	1.13322907099541	0.0783061222503241	-0.069047395887099	-0.0788594311338451	-0.0933948498417282	-0.0620009090957621	0.343127665205158	0.519500775789401	0.0847469165761255	-0.0584366685522093	0.219689813038794	3.56724218892078	1.73355133037216	48960	10.25
CD44-CD3-CD5-CD43	clade10	Lung_C57BL6	-0.132302714731617	2.22970894914114	0.238093435425993	-0.0778649234600697	-0.0970979680883287	-0.0522234420354757	2.26156975745823	0.115544786371622	-0.0845453276231399	0.0613019474976959	-0.0134510287321101	-0.112473509414562	-0.108322308138512	3.14175818872563	0.46567058978618	0.0107387139851582	-0.0307616185391085	1.76582771990105	0.239718114167963	-0.00871023147834015	0.0330699245349837	0.0360389942310281	3.70510706740651	0.335549186319695	-0.048951075488463	0.200807851662266	0.628815324400407	-0.00579515852750362	-0.0438866663217756	-0.0275609302398517	-0.027591831424157	1.78014827953904	3.43216966026607	0.347027655132671	-0.034053575591287	-0.100273671234122	-0.0300164107076294	0.673221104648742	0.198646381947924	24469	5.123
CD11b-CD44-F480-Sca1	clade11	Lung_C57BL6	-0.131267624836171	1.91364199062751	0.259142645445149	-0.105347048026139	0.614032610017695	0.794701464779086	-0.0315319246117125	-0.0702847998978342	-0.117455721296922	0.536018944592721	0.0904091983314247	-0.103507634518603	-0.0903127324761753	-0.0869722369447724	0.104040518369801	-0.100541931429095	2.88005858965929	0.131260120135759	1.80091525721089	0.161712983149699	0.00559665711502351	0.0236594516132487	0.0474904959699232	0.0429172148737579	-0.0782712895100022	0.0136017265345052	1.32453818009529	0.10439056084974	0.0718286342289052	0.031667948140003	0.0973846443654533	-0.041566211125822	4.55950905535621	0.718688610739209	0.0202904343381397	-0.0887149682186199	-0.0356311791264298	3.14218243502983	0.431355817132205	31200	6.532
MHCII-IgD-CD44-B220	clade2	Lung_C57BL6	-0.132516789070683	1.996363015457	0.267987110729427	1.8448877834708	-0.00811080260130724	-0.0330254811908116	-0.0894751637021267	-0.0320060069435594	-0.0545438671456371	0.137438522659995	0.0391845407833205	0.291219616350383	-0.0852008054224341	-0.0594026360332145	-0.0421495689035399	-0.109046045985105	-0.0144421433545419	-0.0925018229197502	1.28315722369807	0.251017310714673	-0.0479441369794902	3.79095008417912	0.369176074103898	0.0292172789842621	-0.0851755615208517	0.0538534321664577	1.10383864129282	0.00709745838899752	-0.0907295800115582	-0.0179115203321114	-0.106668973387716	-0.0842111782536454	0.0108917470958126	0.0325469922085352	0.0179815911931491	-0.0264060455979295	2.76832825946364	1.07949023291039	4.70100690242611	103279	21.62
CD3-CD44-TCRb-TCRgd	clade45	Lung_C57BL6	-0.126382491386624	2.44376768584889	0.224109615974776	-0.101184812302288	-0.0810745078892741	-0.0437675961423033	2.29450139245835	0.117995222218883	-0.0896589509389129	0.0499946427601379	-0.023154329724207	-0.121141602847748	-0.106983676394796	0.119787295540288	0.6981092483669	-0.00870996554573678	-0.0126932872855135	2.38311292589862	0.334854546780467	-0.0175560494091436	-0.00604794677411539	0.023664243799483	2.58294454907785	0.208791271318722	0.0481973849556497	0.0714264845766466	0.739389400835714	0.707942464510404	-0.00412966345516104	-0.03848795450708	-0.0366161975411005	1.13417636613956	3.09593755266884	0.331872734913154	-0.0298346683147075	-0.104032579358149	-0.0508551099295887	2.21437026501404	0.22056689764829	2604	0.5451
Ly6G-CD44-CD115-F480	clade5	Lung_C57BL6	-0.12399066250739	2.02676306747978	3.31032485648312	0.377407813732845	0.208832273126884	1.42669748358449	0.558609335299592	1.6808915426658	0.448893396269754	1.7269726773349	2.47036829216226	0.209195090462594	0.142929988153992	0.433456840114199	1.40687767779957	0.1510365303768	4.11177944271948	0.66260877286453	1.45034528387337	0.58346904155506	0.040824145887864	0.252475733951677	0.152549277633145	0.480253458204515	0.0554225207254746	0.500986569228446	2.34921809651331	0.189163988461819	0.0250476229129518	0.118788262977367	0.0308869489461176	0.031469391163098	1.56789887630322	0.344488702383741	0.0228830628528331	-0.0177896147220514	0.220926941724125	4.67755183255751	0.903472418070988	73010	15.28
MHCII-CD11c-Sca1-CD4	clade56	Lung_C57BL6	-0.116951527346122	1.62507889716914	0.405479981597981	-0.0686385935422965	1.14165196255746	0.166985244532531	-0.0231811469004717	-0.00511778567802875	-0.0996913967080381	0.45626152884152	0.146454661617089	-0.0713145469555321	-0.00519278857910946	-0.00336455253074886	0.051417111947559	0.440098996871216	0.81050129672628	-0.00843568086157922	0.639305574146778	0.0760711822058369	0.10734345224343	0.28067871051794	0.38801957525333	0.0832477539549707	-0.0328969263828083	0.52903171960601	1.60344913223585	0.117159330390939	0.0427055679240311	-0.0335902699423424	-0.0518049990898757	-0.0391032127829061	0.606222623208665	0.235347605340458	0.348226612604719	0.117243453849458	1.25225183692429	2.63593390874922	6.13820529980907	1480	0.3098
CD16_32-SiglecF-F480-CD27	clade73	Lung_C57BL6	-0.131670909820494	2.18540580424272	0.188370906172756	-0.109713979966102	0.305769119646676	-0.0577875958939155	-0.0814678051246243	0.274927972017532	-0.100767773117261	0.0605254874080265	-0.0660501959176959	-0.127048340563329	-0.110623885386295	-0.101012562727583	-0.0186706478916841	-0.110414484495049	1.04795208280316	0.983416271880547	0.916450857284981	0.0968398007991716	-0.0312902142534755	0.289715738241364	0.0608320101088561	0.0369760015598191	-0.0940574839728862	-0.0168281670236136	0.564295793298669	2.97408583034986	0.1708885491781	-0.0500946736120802	-0.0975987220416939	-0.0843481556199997	1.32920788204992	0.100513039930646	-0.0412695584642253	-0.111733379931852	-0.0612824782584462	1.6399408994274	0.0875825914820976	6112	1.28
x120g8-Sca1-MHCII-CD45.2	clade77	Lung_C57BL6	-0.131470779988806	2.08615935325214	0.332395983726229	-0.0846111203805657	0.529432588231505	0.048504740422817	-0.00999982469950474	0.01959159148892	-0.0764929834910269	0.241009486625601	0.0872936369852507	-0.101619699799755	3.75114391317956	0.535069021740864	0.879018139772837	2.21293744419541	0.149660844151867	-0.0696599459383545	0.362784686959356	-0.0325090451716433	-0.0396028907228437	2.0093096225639	0.434725652525412	0.0755332625874345	-0.0646909029847974	0.183322443660265	3.11875056045134	0.249316247626105	0.185748384604353	-0.0520314400275865	-0.0778823577877509	-0.0390903184634729	0.478297960964772	0.108665358376849	0.0062427120383846	-0.0877064552707408	0.108358354689772	3.62474744127548	2.1189703274767	1921	0.4022
CD3-CD4-CD43-CD5	clade8	Lung_C57BL6	-0.131841773404872	2.10542425514982	0.260892354441434	-0.0955585018986662	-0.103731397286731	-0.0438099235245762	2.54152729675296	0.112204301901088	-0.0745218085185575	0.0719218449985315	0.00857074158371263	-0.115145023603688	-0.101451704976976	-0.042189159777972	-0.0183538739736156	4.44094607856744	0.402513555710987	1.27873475075321	0.129342070667343	-0.0311480371546401	0.116532342540082	-0.0255961869741432	4.37258859848401	0.422375402304402	-0.0562502233301613	0.140924794434526	1.22248343217551	0.0328524461009982	-0.0825194315926371	-0.0449645947211424	-0.0652269405191047	1.961032547803	1.44958125759174	0.121390156933421	-0.0681481020889985	-0.113461659881473	-0.067903221143297	0.856364026500214	0.252873894784449	27723	5.804
Sca1-CD44-CD45.2-CD11c	clade80	Lung_C57BL6	-0.0874382692532342	3.70458488607751	0.674370616635411	-0.0351935039335341	3.77924802648342	1.6072971827456	0.178493558367055	0.0976008422771548	-0.0532496692928895	0.578761211720244	0.336217802929627	-0.0560633792761416	-0.051450061064572	0.121368087237584	0.175677669085713	-0.0415924348514575	0.167134606082221	0.169589531425107	4.18478842685025	5.26755707245654	1.52665676519186	0.159451587573261	0.380718061960406	0.199938441099408	-0.0223942974913295	0.192753386090264	1.57279340401195	0.100185274299905	-0.00943019682894283	0.017325026345024	-0.0597247965972127	0.076251864448849	0.24601224852289	1.68973249770222	0.625156541466608	0.270280279130202	0.415078610490434	6.27416447155018	2.2947719728756	104715	21.92
CD49b-CD11b-CD43-Ter119	clade81	Lung_C57BL6	-0.131628679257105	1.83327224811022	0.161235803103033	-0.116936369077909	0.108971031911203	-0.0855783292786793	-0.103816111944748	0.20053705162578	-0.108652684715359	0.00583376206657606	-0.0840634132267328	-0.128538427272272	-0.128817788357926	-0.113191043351601	0.0401982713565282	-0.11650351863196	1.35821068650201	0.0858698316443491	0.43398810281755	-0.0405715675939168	-0.0764986474926776	-0.00224403337823143	-0.0234009177957924	-0.00958899478659513	-0.106376826617206	-0.0463053865486176	0.429751466018113	2.39085370372629	0.144723567906154	-0.0166759021632179	-0.000257246036104415	-0.0793261687933374	3.92743098283351	0.388834586956589	-0.0271856713927418	-0.107825600511384	-0.0950755274667554	0.87365458552841	-0.00921944831604922	12790	2.678
CD3-CD43-CD8-CD5	clade82	Lung_C57BL6	-0.138439392811627	1.88639773374954	0.181530656912394	-0.120985712036981	-0.0629141276270286	-0.0873527461214071	1.56958877557774	-0.00931207541905123	-0.106390568226513	-0.00954532682390221	-0.0564713089882603	-0.13148328562157	-0.118822310057042	1.29177009042698	0.189934382407256	-0.0545391610446175	0.00779137672117638	0.522568913651063	0.0534812150664811	-0.0527115139383566	-0.0432373622674216	-0.0281591200979116	2.75134030370831	0.150349254331608	-0.0715130121586529	-0.0104432430901651	0.604633861215527	0.0576845607599245	0.0341351721042369	0.0248090219620369	0.0954344625648267	1.19520037237681	4.3640514348699	0.529038402862198	-0.039527208191879	-0.113400166559022	-0.0972405304696633	0.536449687301143	0.0353476493042328	2527	0.529
x120g8-Sca1-CD11c-NKp46	clade83	Lung_C57BL6	-0.131322624714352	1.94177195213866	0.243006179628165	-0.118558268279884	0.237901595814211	-0.0477124144829251	-0.0593314461268488	-0.0473838568092057	-0.121172425610618	0.0853087485043879	-0.0279770048513775	-0.127061324389819	0.429530620080004	-0.0244854520457383	0.230740539844401	-0.0579489481979954	0.185332739038639	0.247289947935831	0.244238519727151	0.0816400490904665	-0.0079560033626624	0.121214616189016	0.137210018984525	0.00386434471119049	-0.0964037525441746	0.0124712300559099	1.38207601547723	0.0765613785661141	0.00366153546924588	-0.0875363914354953	0.00426789781856728	-0.0458659869633027	0.391541173551909	0.0481444233912042	-0.027783528857421	-0.0799103424479335	-0.034514419159453	3.62654898344002	0.580488561390194	3131	0.6555
CD115-F480-NKp46-CD43	clade84	Lung_C57BL6	-0.137901818114976	1.91243127782411	0.973803308163905	-0.080538975155613	-0.0691458937331502	0.198413756561021	-0.0236434128231733	0.214962233577749	-0.0451249765577482	0.475258254289107	0.799305752939476	-0.0495864862380282	-0.0574675116886169	0.0396225169327342	0.684152898729663	-0.0280288826015363	3.70659795326637	0.298286479669349	0.934808483708768	0.217350986411612	-0.0413169059928963	0.0589049185487799	0.0261951104902916	0.153026552582322	-0.0589317373870717	0.151675305172352	1.9026749497227	0.0764679434016892	-0.0545638091780534	-0.0279133842692256	-0.0625287693209334	-0.0545003945116881	1.35463142706022	0.171228598689201	-0.0300417119573224	-0.0844474179761809	0.054374403798455	4.41444224661752	0.704530181573564	6201	1.298
CD49b-Sca1-IgM-CD5	clade85	Lung_C57BL6	-0.121123809355738	1.74502460827612	0.213622458830069	-0.0873175045495966	0.00919275740844125	-0.0479909323733568	-0.0355991634469677	-0.0686239715821981	-0.128537513951918	0.00553293172585772	-0.0908795914863306	-0.127438721601718	-0.0956436700253425	-0.0606601187860489	0.0185630301702619	-0.0579181451982557	0.290679083086932	0.0694489340653106	0.186641231420325	-0.0460113121999963	-0.0725205513370517	0.101655504150249	0.109548458930444	-0.0344882367869545	-0.0721149953107119	-0.0496499418757462	0.35137354021385	0.219115571771151	-0.0742659492197566	-0.0918780315780085	-0.117718759025264	-0.0300205661805784	0.461738763667406	-0.0442278367790352	-0.0652274108211408	-0.114583972584081	0.071365444555537	0.757087217064081	0.343949634548061	2957	0.619
CD44-CD3-TCRgd-CD5	clade86	Lung_C57BL6	-0.129595789850589	2.03667345532618	0.257868407902207	-0.0958467501778841	-0.0877251645343968	-0.00413729209282773	3.68352290917088	0.248649187875254	-0.045338118199546	0.0799953426458245	0.00612700600186689	-0.110823033081339	-0.111762247308215	-0.0453749235638837	-0.0106864182242373	-0.0558070886276341	-0.0315640841183275	0.115853250053386	-0.0156323763901685	-0.0596497618979274	-0.0423519838070693	0.0418834586092025	1.92172578519719	0.16239382355931	0.716874535498932	0.160236418173107	1.47126829205661	0.0960295932796858	-0.0480671462667742	-0.022507686348875	0.017710961273829	0.0860250758591743	1.28271626997686	0.133514406760665	0.0866425060511638	-0.0815063184015514	-0.0281236229795711	3.98261867033365	0.697588410100772	1086	0.2274
F480-CD11b-CD44-SiglecF	clade87	Lung_C57BL6	-0.121372028224862	1.79005985157926	0.358117428021197	-0.0864555391908716	-0.0539083632524862	2.04425474926046	0.0834396766155217	0.0163565675157296	-0.0961087264723255	0.349198123706188	0.152474062388061	-0.0912922124333639	-0.102652868810245	-0.0584100651487784	0.262132075747616	-0.0866505545788447	3.21784276597737	0.185787594666223	2.10414670287482	3.47438001564784	0.527687805216661	0.114167309765588	0.0322902628906615	0.024097366269737	-0.0826591001778389	0.0574487420059125	1.03125567315134	0.307335131903218	-0.0606534418477387	-0.0591568881184455	-0.0884419962552273	-0.0587616924503394	0.54164423284646	0.120169097923706	0.025830107895512	0.0155004314014424	0.0782514745718725	4.42679518917007	0.723993965120514	2641	0.5529
CD103-Foxp3-SiglecF-CD16_32	clade88	Lung_C57BL6	-0.101955379653566	3.51435324192379	0.392594762735264	-0.129267563836498	1.46519219888859	0.239897372271101	-0.0837907175054243	-0.0968943177846844	-0.127420882604079	0.0487616902078372	-0.0197009120689091	-0.124960477262409	-0.119957932384643	-0.0499423120349261	-0.0430021278515534	-0.0985190529671167	0.0896162730055522	0.0447734286759973	3.66044848071153	4.69205103857742	1.18805764295854	0.181482195074089	0.165806558716272	0.0572640249465273	-0.0705459316266084	0.04387479390116	0.938871575623968	-0.00799765682675535	-0.069975747628781	-0.0621095217261352	-0.104545137721782	0.00548661887620299	0.0875092186583906	1.18287936392504	0.500235008588891	0.42956555536895	0.21922904187506	5.99891694816183	2.0022785787956	5609	1.174
CD4-TCRb-CD16_32-CD44	clade89	Lung_C57BL6	-0.0913761800075446	1.70448716159916	0.276330761467982	0.140236422942263	0.0293118266000007	0.0352958368725568	0.000660921118587671	-0.0957106362110574	-0.105511684424404	0.0713536176242101	-0.0486656362245024	-0.0162136054114571	-0.0125541947414703	0.00499531260306105	-0.0123310719522134	0.197029950327048	0.13560004228889	0.00487856415639024	1.04208285493132	0.0733565511415907	-0.044258817847857	0.623275546734307	0.497400960821979	0.200614210500596	0.0864479960855416	0.14155472576043	0.876439473670403	0.235931613637283	-0.0642990529215155	0.0689104111677699	-0.0984467217264	0.186059901640766	0.459796332941266	0.0308777293297245	0.00421454699464237	-0.090069707355055	1.08455758855841	1.89844110757714	3.20242327724382	2761	0.578
MHCII-IgM-CD16_32-B220	clade90	Lung_C57BL6	-0.126728038975762	2.39453595889174	0.356489570066261	0.154349011305982	-0.00984150214561748	0.0211340201526033	2.49027126395476	0.146721782424268	-0.0559133635569637	0.214967863602022	0.0741375070534984	-0.0495871655179842	-0.0474299667778529	0.0290004230322685	0.121430325927341	4.34976215204772	0.567161836566977	0.842446274672	0.443625431099286	0.0801484563452178	0.313032110979957	0.521750636144307	4.63258504303547	0.527939588810682	-0.0362063391263662	0.144560869033826	2.85978807199861	0.370647635177673	-0.0419058711959943	0.0573849742675518	-0.0361676859327051	1.68984443620403	1.20472219315501	0.15091780294991	-0.00840265381464769	-0.0895987901464669	0.412070321655825	3.03563715441108	1.63315829634747	2432	0.5091
MHCII-IgM-CD11c-CD5	clade91	Lung_C57BL6	-0.113391561022282	2.97391080606708	0.573431739977274	-0.0381973598691899	3.26153441518848	0.432691920576842	0.207109989897724	0.0856514005451755	-0.0676688866779369	1.30603666225956	0.43082487993092	-0.0396558381637336	0.0518512983114565	0.076292535990542	0.094691239467144	0.220136479727291	1.01304611040312	0.193866001617224	3.8462336851713	1.06550364126348	0.511430334422486	0.133751674019701	0.636871616660391	0.260635433246221	0.0322341823296633	0.69087431867185	1.92821183651438	0.184882650140951	0.281387452196497	0.0454145007249298	-0.00435812961911242	0.115829516713207	0.529277077883416	0.526026913652655	0.527813446756135	0.445561155867551	1.6075449441965	4.72212246983196	6.19524724831678	3718	0.7784
CD45.2-CD34-CD5-TCRgd	clade92	Lung_C57BL6	-0.126863338462531	2.20272527825527	0.298307769790092	-0.106766688662409	-0.100442879786464	-0.0233417351552405	2.71946960398785	0.120005668478956	-0.0739651770719527	0.115577857989613	0.00238747987368442	-0.11850681826688	-0.112359022371261	0.1056948241548	0.0132333800983862	0.0614302757347181	0.00908469945134147	0.680840355776034	0.0602103289237817	-0.00831962512429003	0.0337668290619884	0.0896312739825085	3.26961941322632	0.281719754132396	-0.0241141187751493	0.0829239460248763	1.385934276899	0.115617448941669	-0.0572385230319265	0.0483929481323239	-0.00932001085565214	1.52420155770762	0.740483167186108	0.0960054790685392	0.232831552196582	-0.0529658387173874	0.0111929094716183	4.29233577315077	0.867225697442146	1340	0.2805
Sca1-CD3-CD34-CD11b	clade93	Lung_C57BL6	-0.0863253440624499	0.81733069187381	0.342259366121987	-0.0334495398992882	-0.0723929006731763	-0.0131541090121529	0.0710721067588441	-0.0563411603810965	-0.109896457219438	2.03888817235369	0.272575062246574	-0.0334389629919886	0.531644277266032	0.00463579320441579	0.877362170723312	-0.0224745752464098	0.109775257521561	-0.0642460149308558	0.0914524123021403	-0.020357482146863	-0.00015531429855238	0.184644108315202	0.128855734839196	0.0135851578697431	0.000813529158062384	0.485928876541806	5.15508867555457	1.19457017407914	0.148012156908577	-0.0774669119648131	-0.110435910324695	-0.0702619849513258	0.139274615806067	-0.0537453016714357	0.0247794533201101	-0.112821205962394	0.0709974644601773	0.433982503927803	0.688259010259954	1194	0.25
CD8-CD3-x120g8-CD4	clade94	Lung_C57BL6	-0.127709481536179	1.76365974309675	0.27782410936248	-0.106392281551549	-0.107834462694161	-0.0761509314121723	1.6347606002852	0.00415697826344477	-0.100411962457169	0.0899517972497272	-0.030965389130136	-0.122066541503593	-0.10772589964436	2.23561195547672	0.0869717538936351	3.31326370855743	0.144692430253934	0.296916267803808	-0.0402930477149712	-0.0910899586019527	-0.0770781925979914	-0.0423081941538758	1.92522214188849	0.0717400334551021	-0.0858154213969902	-0.0188793077901807	0.880437676500441	-0.0133367675915421	-0.0878881458899855	0.025448458467336	-0.0905529769721096	1.19742681069148	1.10485907423083	0.0578641211239388	-0.0660989840479402	-0.11132814128941	-0.057061322036557	-0.00513415266071054	0.0902571342052448	1800	0.3768
Foxp3-F480-CD5-CD64	clade95	Lung_C57BL6	-0.108728270631413	3.53247111424928	0.405955721054855	-0.14930850590313	0.191104492816842	-0.0897843327175041	-0.136487323453653	-0.139420905998323	-0.149668755955239	-0.111474794479724	-0.118912617943401	-0.150904978004201	-0.148606795006535	-0.129105576440938	-0.113208071901669	-0.130461093420111	-0.0378375393012306	-0.103928699008098	2.0526066435885	4.20728464180844	0.274988636486915	-0.0712580120955692	0.00401582559943884	-0.0764695113773785	-0.130311043986158	-0.0740188790849073	0.314206522965647	-0.101462008541851	-0.122745035270714	-0.117665352419424	-0.136455004539732	-0.0608513001395555	-0.0454471796675502	0.30768341233849	0.0278262556464067	-0.0604314272786399	-0.0313655835941369	5.79556442595129	0.947538191527702	2008	0.4204
CD8-CD5-CD44-Ly6C	clade10	MesentericLymphNode_C57BL6	-0.0798940959706915	2.14310504043693	0.224566500901001	0.0106135825794513	-0.0494479991027409	0.0135208046933736	2.57109932054809	0.201724019056169	-0.0136652084942859	0.0321231551520631	0.104075528572263	-0.0609202431649157	-0.063415919521518	3.34471262497776	0.993336765012124	0.148371393005636	-0.0182986165963811	2.17059032319748	0.327534968573291	0.0324358051674475	0.0830673778827672	0.0727305202844793	3.4872802290118	0.400987101766329	0.0259897755465602	0.273937650574707	0.535407366993948	0.00508887389833733	-0.00191429010683108	0.0357536382743596	0.0231729173503374	2.00189954434863	3.23938820436482	0.437673204306771	0.0212474586502681	-0.0348918312229186	0.0104038502971443	0.935785336062054	0.466135851100283	560419	27.08
CD44-CD138-CD16_32-Sca1	clade100	MesentericLymphNode_C57BL6	-0.0631760623287269	1.23782239951659	0.367853120338422	0.134944943070615	0.00698364778102404	0.107164371666943	0.0549885431030045	0.0567710720831294	0.0262070217695681	0.177029749706135	0.267270146557336	0.208891737304057	0.149441992684261	0.122494015067773	0.100550951615189	0.34223233756277	0.177238019352007	0.100603620614548	1.0840618699303	0.167381691530492	0.0844482721658159	1.03289398366053	0.744582088157056	0.16654668564549	0.0240997160285354	0.328088127016779	2.04647427189112	0.195096981061769	0.346363141768618	0.110832671341808	0.396950869055387	0.103794569821495	1.36204584590479	0.299418797611691	1.95274002808183	0.411511275272964	1.0225327628658	4.73873418638135	4.87084595338482	3491	0.1687
CD27-CD16_32-MHCII-CD3	clade101	MesentericLymphNode_C57BL6	0.143204110057103	0.981066822472208	0.0310852832491342	0.129700824316605	-0.0667488195231474	-0.0698349455510722	0.104383037383846	-0.0640694643007877	-0.0572506691327627	-0.0698786946630408	-0.0579006671779711	-0.0503396613978359	-0.0880379477626237	0.100871934131066	-0.032580549888752	0.0737452513490737	-0.00515545640595876	0.0452509910611237	0.0874776939288653	-0.0408543904012478	-0.064585161198193	0.17344400029493	0.201847611919541	0.219240158517128	0.148021069510586	0.172296226643936	0.326565682904822	0.197772020038021	-0.0590629306435852	0.0762539762594434	-0.0643458084452881	0.0649011897644639	0.168264913573024	-0.0403594085691325	-0.0715059574858346	-0.0869918699718517	0.147423941224761	0.646519892137121	0.385458117727952	4340	0.2097
CD44-CD4-x120g8-Sca1	clade102	MesentericLymphNode_C57BL6	-0.0784681894888671	1.99699591562545	0.49852374085017	0.121577215076478	1.58617258032979	0.245299399221358	0.214558227601286	0.1678569300573	0.0374069247425161	0.215190486150524	0.44998830241056	-0.00236086046812757	3.27382699877636	3.45686755900836	2.68738407035859	4.69187198346054	0.515891666215337	0.0435547234296252	0.515593650689041	0.00786885378328811	0.018886678267613	2.43166926654003	0.646308072974201	0.205103139637768	0.130638490909999	0.886749813586908	6.22084788032831	1.25727288430119	0.0873068109902057	-0.0399083371623729	-0.0433574807864493	0.0151046732702201	0.27901999270981	0.038051582436606	-0.0209309836232081	-0.0506321291665578	0.127182378082899	5.73550898936016	2.21398430651866	1057	0.05108
CD44-CD11b-MHCII-F480	clade103	MesentericLymphNode_C57BL6	0.754592046338154	2.38533447554264	0.623897904446217	2.53286876835323	0.404051508951817	0.721011373938572	0.275627461119996	0.109181840792015	0.551649597460232	0.209652793675933	0.407820896871161	0.691988584550417	0.16500471081722	0.197647883893066	0.139087443086035	2.29255277041972	2.11001933871853	0.163580375479745	2.15959021757096	0.468993170854586	0.0688417556831496	4.25469294709369	0.611647249896503	0.163018361166669	0.0153148130153161	0.186230094332501	1.65742977330768	0.188053475602932	0.00660233648002187	0.163461544931829	0.0088436661194192	0.103813556151833	0.1861287847206	0.61298787259727	0.210661844566155	0.0798198858970356	2.79395242338118	3.78013564560839	5.09461529822796	1226	0.05925
CD11c-CD44-MHCII-CD45.2	clade104	MesentericLymphNode_C57BL6	0.00210178902229384	2.14133494651768	0.446528155444186	0.0759985475855678	3.20236202756562	0.476551065089663	0.211896099389664	0.101712565009525	0.0128611725917733	0.305998489672326	0.378782381630236	-0.0311777116007	0.0829427974602149	2.99202671919556	0.278956599704218	0.69226514750581	0.505729069346789	0.0568736775334018	1.48923597224361	0.213631870192653	0.378691976132008	0.363333608554635	1.11417673900967	0.280209323429871	0.0479078144740465	0.367205993498018	1.19505099158694	0.0782733483244288	1.34892944559723	0.16695200702841	0.0130069338483949	0.197350394065577	0.428839343050255	0.375168157203862	0.185071857511367	0.123994634325516	0.893764173335561	5.38628761823829	4.91838327529203	1351	0.06529
CD11c-CD27-cKit-CD44	clade105	MesentericLymphNode_C57BL6	-0.0364774411130487	1.35924623636982	0.245392862949644	0.0582954132051113	1.7620134295559	0.241328480946304	0.109036236773389	0.0314303793590138	-0.0389387893942193	0.434542164367491	0.2281636967579	-0.0398695702842588	0.0841734250872446	0.366442266115666	0.0872507795548215	0.450836696665231	1.06884632336266	0.321012011237906	1.17838887740642	0.261442460715457	0.157873453588181	0.248546670023335	0.995526130801531	0.183928906270008	-0.00621032553932296	0.206034297819321	0.643232758533854	0.0267283326750103	1.10293994380865	0.101782316294245	0.00633132973604816	0.112951396293198	0.548678129959881	0.237990895459824	0.0894031446152495	0.00656587070844572	0.42478716827417	4.86219738225028	3.71669258772875	1152	0.05567
SiglecF-F480-CD64-CD45.2	clade106	MesentericLymphNode_C57BL6	0.024391827620921	2.09060233385614	0.512723678306973	0.0518673168528353	0.240410335921515	2.75249864141413	0.325665643860738	0.14473645840819	-0.0111165006985451	0.669229411500755	0.477580076215348	0.00446860717795382	-0.030615167658803	0.115887299402936	0.404993249798601	0.382148472127376	2.73533892373249	0.239888044329241	2.08947796319987	3.49739232242841	0.729379776853963	0.231274937333576	0.147321395875224	0.233975825341338	0.0243801570941989	0.317641473122038	0.471575896671449	0.330875020679526	0.00414027111372057	0.0517823261748414	0.0180179524173855	0.136923363310052	0.38161886973639	0.396987786480322	0.121506914376036	0.182235469845553	0.337630724122175	5.55019156728036	2.02180129743764	1359	0.06568
Sca1-x120g8-CD4-CD45.2	clade19	MesentericLymphNode_C57BL6	-0.0763146238095206	1.92495952774219	0.398932262593329	0.108393893045744	1.32593043915593	0.197052096163379	0.143587956654736	0.128116777499182	0.0174439399819873	0.193387921665479	0.369807558634897	-0.0150274702387436	3.18496643286023	1.0913411778124	2.54988604378719	3.30432318632751	0.401714829167627	0.0212015952261929	0.60277202246243	0.030941635766116	0.0506253105263713	2.53798671035653	0.593678319754434	0.216922559210522	0.12128823902046	0.804347338872427	5.82506926923129	1.13867912703012	0.0916105550967898	-0.0242995148311996	-0.0471691054088967	0.00878551755623589	0.30743228527805	0.0549316132410803	-0.0117088449121841	-0.0529728804863387	0.148507250378744	5.49098553521324	2.05205024060418	4490	0.217
MHCII-IgD-CD16_32-B220	clade2	MesentericLymphNode_C57BL6	-0.0752006275939219	1.93631881231034	0.316243683484899	2.46873309481879	0.120372326581657	0.0483787369897253	-0.0105036122552175	0.0280147535263299	0.467770061660637	0.0821534275852819	0.186824784161206	0.605000701372448	-0.0209928941443329	0.0480069917743485	-0.0478068808419634	0.00407418158181306	-0.031360424816081	-0.0320906118962434	1.57936177449961	0.349237635661496	0.0175704643525456	4.24952994287306	0.538393142166787	0.110216396957915	-0.0163216907234693	0.0831734679351589	1.34058336275835	0.0375548107561291	-0.0472582307131425	0.098746338746979	-0.0505450297498011	0.00534467242917177	0.0703325560858375	0.0952730534649274	0.0831898792300108	0.0177601161201886	2.72442647280901	2.00175991428848	4.35214043588009	775109	37.46
CD4-B220-CD8-CD5	clade22	MesentericLymphNode_C57BL6	-0.0628536777922881	2.71369802706169	0.522034734847673	2.10587569556206	0.137169965509837	0.133561193899109	2.5590120641403	0.275579728855301	0.411761569225453	0.1649914889309	0.313538299587757	0.474931980229563	-0.00264268874455	1.52385789615038	0.476177570566676	2.5597317303216	0.336288352249249	1.79616090277339	1.33113659676951	0.312629472699492	0.269964863073736	3.66249597531602	3.80775895392607	0.54154704942001	0.0634016846220893	0.330261034726146	1.88424215894136	0.138853500480923	0.00594607348472804	0.175365482867882	0.0617724486086096	1.97596087589603	2.01719800413794	0.376587472156529	0.131061298374732	0.0275344390013626	2.17148593467443	2.39012925215249	3.93021502520521	7494	0.3622
Ly6G-CD11b-CD49b-CD150	clade26	MesentericLymphNode_C57BL6	-0.0494281934222034	2.01981436258364	1.20467327378098	0.297843680565109	0.271614943795658	1.27235303692896	0.32785782103589	0.500046561269914	0.133656519524403	0.706822373547593	1.28626296092714	0.0998874951655374	0.0908880599491627	0.239479589027038	3.21263304414402	0.506806491006299	3.63031599495599	0.423784825680133	2.68743564254091	0.487230225300077	0.0890706273693272	0.145955892862178	0.240410961698053	0.251982198114462	0.0606108864629026	0.244056219604576	0.638598110869783	0.354540627169359	0.015869285084367	0.231757686342512	0.0406662802200496	0.106725556484934	1.00003882611763	0.724267631105838	0.138646636492429	0.0222152414125938	0.432341739161224	5.31231021295862	2.30123169655804	3256	0.1574
x120g8-CD27-MHCII-CD44	clade39	MesentericLymphNode_C57BL6	-0.0229162995661859	1.78867789032305	0.205260418917611	0.0320128231373976	0.494680178224879	0.0926856822444329	0.101511894079061	0.267704992322793	-0.0299576411899842	0.106721539811467	0.103491401351101	-0.0345150890983489	0.287896864304911	0.180171746627617	0.429791469747454	0.506543533492683	0.302469402733275	1.1198291580518	0.563282748023089	0.048137469308334	0.0217895686526576	0.390556886122294	0.389718499072886	0.133079908931213	-0.00886161602103386	0.166488975235354	0.67175426400723	0.603354434125603	0.286058582644897	0.0252482900637483	0.0858800179861829	0.105130437091043	0.476055442613114	0.193807505636469	0.112214964850668	-0.028981301636383	0.205113312370405	4.37845531077475	1.92843658431248	5509	0.2662
CD11b-CD150-CD43-CD45.2	clade4	MesentericLymphNode_C57BL6	-0.0640829016287391	2.215800457114	0.183298468887841	0.0395893305049875	0.485361341786879	0.0584783482705132	0.0672653171845807	0.317018895262712	-0.0331847908330758	0.0199374103253109	0.065755860332349	-0.0629148453314828	-0.0779789770844368	0.0286154949583534	0.20344507218201	0.0820536313790289	1.05782968637253	1.58893997877312	0.848382590279589	0.0701816014436543	0.0203172397265313	0.352769920175407	0.191745910375881	0.142035066243922	-0.00363557362891118	0.0974590348448991	0.204812381759092	2.79949618132171	0.295941599457162	0.0727208783283114	-0.0206557139046731	0.0558883586102859	1.49768688872883	0.251953099990248	0.000483293512528101	-0.0495246023446833	0.0681228706574814	3.54296345821894	0.839243172932118	5216	0.2521
MHCII-CD11c-CD4-CD11b	clade50	MesentericLymphNode_C57BL6	-0.04670571380299	1.9865444280724	0.459543482472905	0.0570402028742177	2.41173510825538	0.606872250113897	0.142573176830155	0.0810863646532888	-0.0203343910607203	0.196721969808732	0.332183621684702	-0.0353891886321796	-0.00609598867169071	0.131659583862516	0.0117420337766456	1.21109713580035	1.69974266944303	0.109221776122365	0.378405415387152	0.358659065716463	0.246577511923207	0.280385904259597	0.662719209115908	0.21400046535928	0.0389040125747905	0.924552830743559	0.675697598098957	0.0350329632440666	0.285007265727189	0.12568940672633	0.0265187875584179	0.11192387211929	0.267113546984993	0.346398470325365	0.242799987091295	0.202090613289718	1.36869260280279	3.76166804718244	5.90506553502715	12816	0.6194
MHCII-CD27-CD3-CD138	clade61	MesentericLymphNode_C57BL6	-0.0395459305858417	2.16045788954812	0.327853223496958	0.0385338673241684	-0.0127781973512522	0.0924644407145759	3.01606950654028	0.290161688240146	0.0141746651056425	0.0776167220234014	0.160523770151411	-0.0497347367633477	-0.0492306159783488	0.224614790732537	0.116747786489569	0.737319951824427	0.144250196384271	1.3241020139398	0.256765849596071	0.0158200084227632	0.0785914982701137	0.19250666460011	2.87161987940208	0.359879522369936	0.170834167838679	0.268639291544583	3.16842476307149	0.408132180037552	0.0186784785487797	0.0627065998187028	0.0416658134287585	0.94034882015705	0.899911121657089	0.226291608530979	0.289075051428692	-0.00402571526438229	0.126137128175337	4.45564265374364	1.43281678240773	2942	0.1422
CD11c-MHCII-CD45.2-CD4	clade62	MesentericLymphNode_C57BL6	-0.0345880158285126	2.10264517785484	0.749158192352327	0.119567681926507	3.175151718526	0.539746920513269	0.264454094620179	0.19872826871617	0.018025818556797	0.393312643453007	0.641127253495867	-0.00462328859718767	0.307403093680727	0.670648703747297	0.0820511797501886	0.484094523130021	0.416436782355596	0.0636378959858113	0.402282299643118	0.246982475377783	0.432454927280571	0.646720222554161	0.711997129683812	0.413819867611164	0.208522723675611	2.88575775067254	1.33805091798164	0.230261211708373	0.144763570217942	0.288762504121778	0.121185650381665	0.194158820378423	0.441798169826704	0.567779771002597	0.523710953130014	0.498016434705967	2.31469855358635	5.03154902548157	6.84043580723313	1625	0.07853
CD4-CD44-CD5-Sca1	clade8	MesentericLymphNode_C57BL6	-0.0786416284603242	2.14390986575419	0.259935755553527	0.0212926103767388	-0.0446543790282797	0.0304888174470407	2.79844359977847	0.229153628161911	7.74792284793244e-05	0.0480810276954205	0.142429797743178	-0.0595366324457862	-0.0554743737788305	0.0643946227870923	0.161654380817022	4.56664152336938	0.542452702000066	1.69156343208406	0.226847595855952	0.0198555653724123	0.285515374805477	0.0629556081966503	4.27421492620069	0.532105971085495	0.0177605079505058	0.228465214626064	1.89756170760601	0.096887671759007	-0.0326205409480468	0.04179738714153	0.0569650268929562	2.20694697768014	1.22093805352745	0.173710018719133	-0.0196296918505062	-0.0596831997914386	0.0096664789956488	1.75966571866475	0.501051439222099	667711	32.27
CD16_32-CD25-CD45.2-CD11c	clade96	MesentericLymphNode_C57BL6	0.0868323157431202	1.58840181439724	0.45627010606863	0.100670404948091	0.425615519170664	0.468548538276984	0.213370738642545	0.118777882860494	-0.0109142725303606	0.212582538701671	0.367822230630594	-0.020477910673414	0.153768075983004	0.267593253022741	0.0262862754598059	4.52163014825668	1.27464023969078	0.219844656498804	0.737924052888487	0.089357431454102	0.0246832439535134	0.227326902466255	0.406400160350407	0.130907988973244	-0.0016550338691342	0.44918428412481	1.39537171314551	0.200957939410407	0.572225133517756	0.0989673350431163	1.03666168489503	0.226595295580853	0.526312597656595	0.495898880029145	0.758921156478889	0.154329299823891	1.16030343709655	4.59984102374919	5.27205211254786	2753	0.133
CD138-CD44-CD16_32-CD27	clade97	MesentericLymphNode_C57BL6	-0.0546292122586207	1.53778334074036	0.246108148996796	0.0301804411721488	-0.0385724815876946	0.0485651891598367	0.040057946869756	-0.00766806338104651	-0.0582346172777254	0.111107017343193	0.101558325992527	0.00508236112788915	0.118250482003799	0.0539287246401771	0.228646368476651	0.147667674667853	0.0515115563401373	0.97916118009242	0.88648590519056	0.103258930715968	0.0621752099257371	0.368572988613562	0.436062360695929	0.15035935562608	0.0350649546384611	0.389757575678622	4.38127273768928	0.685749011466888	0.0984693938792096	0.00700658218900829	0.314273246444575	0.0340043978160067	0.486939791007307	0.134424053773387	1.24318273978108	0.216379577216494	0.15727115046592	3.48016416429132	1.31857771266889	2880	0.1392
CD25-CD4-CD3-CD44	clade98	MesentericLymphNode_C57BL6	-0.0433853018042137	1.30887437299886	0.266687539837683	0.0406798314291507	0.0734179334766541	0.0681902374249666	0.25717690484326	0.0746888304173773	-0.0480423575606536	0.0948415405948166	0.1467554305402	-0.0525898345630781	0.125710750444419	0.189302697784206	-0.00528321436411424	4.64835432874508	0.672659686438814	0.166064908071555	0.31711914563541	-0.00668752082612443	-0.00944247610774537	0.167551406380708	0.372708962670259	0.077516936859207	-0.0455829519565063	0.228636476467283	0.826436685683164	0.0663597811725233	0.441275880237332	0.0436976753785358	0.97278709533938	0.299056726364065	0.544357853831606	0.205577788909164	0.600687246847381	0.0335802974501462	0.274896663095919	4.27681729840118	2.24789975524504	1110	0.05364
CD49b-MHCII-TCRb-CD44	clade99	MesentericLymphNode_C57BL6	-0.0715183084148123	2.26183404156852	0.197188664216117	0.0401404926261346	0.758244846157228	0.0459888620614604	0.0927401260541603	0.241776924677647	-0.0452574962494103	0.0444542651537332	0.0790467734341687	-0.0596674738154744	-0.0768820613367433	0.0688847974578051	0.013217014985246	0.0922942470866245	0.200893313321938	2.31289201113698	0.805536184495907	0.0747529691822291	0.0530435074598881	3.12889194323207	0.499706570561151	0.143465524727372	-0.0240392327829492	0.104722867707143	0.265200767215437	2.2062927771358	0.518108717778312	0.0288718082066938	-0.0451424656354402	0.100487850832124	0.34675157881645	0.162391156776389	0.0384230221826465	-0.0341602722411755	0.128054332607172	3.83193311334544	1.16333943797432	1228	0.05935
IgM-CD44-CD43-CD16_32	esc_7_1	MesentericLymphNode_C57BL6	-0.0600106075523954	1.48210315013571	0.719435721953121	0.0909087004114296	-0.00963050034348822	0.236092967371983	0.160648423949669	0.225868352540492	0.0374656042487336	0.327956748863816	0.657456546003282	0.207051584311122	0.150773611657273	0.145292961456254	0.220086034431271	0.195688673007801	0.0561797849775692	0.113320604927578	2.97656511816878	0.525109494354388	0.200862077219879	0.582316335576132	0.755160435469391	0.334457436372596	0.0751681204558055	0.504082272313579	4.4899118231428	0.623230747570192	0.116945776043537	0.0564101533850587	0.0807847596027659	0.103903468241041	0.588193169781837	0.331676273433657	4.33837079894776	1.17184861059931	6.63439616886791	4.4980076630139	1.2222070664229	642	0.03103
MHCII-Ly6C-CD11c-CD45.2	clade1	SmallIntestine_C57BL6	-0.104296528346188	2.86421414797555	0.0797044451193927	-0.0507349301287363	0.518949309081962	0.965699673885044	0.0838897849088705	0.0556517155437775	-0.0638878976429003	0.63171182246755	0.374868743071699	-0.0398273769466645	0.154222452020671	-0.00999218529893237	2.1323016416926	0.33424646198315	3.50060883827611	0.328007585329566	3.64305520166852	0.646852783506441	0.111545670358386	0.0327246906747729	0.219384155285034	0.239600162907011	-0.0224959976642112	0.107406099559278	1.16236984013416	0.167876928504764	-0.00500429570883101	0.0160718737394157	-0.0248651841614685	0.0606743136610422	0.320875291625438	1.59194129099294	0.384400766228473	0.0994613507143549	0.725878033619323	2.80654009874378	4.10984330935958	6163	0.8848
CD5-CD45.2-CD43-CD4	clade107	SmallIntestine_C57BL6	-0.104934118168986	3.17660244444723	0.0491593952665796	-0.0701129269491433	0.0598365894820318	0.0643747702949434	3.0660716910153	0.265770705958561	-0.0176640458376977	0.1181160563137	0.189828083558885	-0.0799423462110317	-0.0713796657772432	0.230550801057355	0.18325313814985	0.12231693429333	0.0393898421514351	0.0628987813015007	0.0493930904150294	0.0251076615590916	0.12121473834627	0.100303457113711	3.97145188271185	0.720158432976918	0.0685208146067635	0.277920798425228	4.52999564490856	0.549841938751348	0.0128576356493804	0.0119306341887056	-0.0643131898508385	1.88225778210621	2.000416540651	0.35116209709505	-0.00695329363760167	-0.0395803092114265	-0.0118580776103513	0.451577814532099	0.22037034845902	12956	1.86
CD3-CD115-CD16_32-MHCII	clade108	SmallIntestine_C57BL6	-0.109435075410702	1.8457660853044	-0.0119895493431194	-0.0875808647574004	-0.0576537073712768	-0.0234149025845021	0.963354061999278	0.0466506413489155	-0.0808613814162971	0.0380607162255445	0.0525526176543287	-0.0991473352475509	0.129055782073937	0.00392054955292963	-0.0537119840820034	3.82963390144274	0.361417142755201	-0.0254911494358495	0.0619633380097109	-0.0504008669998991	-0.0528953424664901	0.0449896466032948	0.554490671059381	0.100361444077407	-0.0678484340667487	0.0944597545916982	0.648535460206041	0.0695657453093473	0.197796783891574	-0.0118118828504371	0.00901227023114547	0.405741444976864	0.789335533587449	0.176617347783795	-0.00945691035990519	-0.0725109447540195	0.0209353039278257	1.46329857123834	0.681457048989707	2854	0.4097
SiglecF-CD115-CD45.2-F480	clade109	SmallIntestine_C57BL6	-0.100954162931291	3.21963376386793	0.0984012009290471	-0.0506977695998817	0.986981639571656	2.49284579266533	0.25021827476129	0.113816462071311	-0.0399443765971327	0.745661125948119	0.384669216978975	-0.0373481780312688	-0.0568974273533626	-0.00702273885762222	0.397633521886803	-0.0301914822533349	4.75675582295344	0.584782575551098	1.47522910626546	4.36549054774811	0.769675397200273	0.113591379051656	0.0533922702820769	0.151042932648724	-0.0496380047889878	0.0589451124038751	0.404837705135232	0.047530810297621	-0.0496857373087855	-0.00341613314982172	-0.0680044875138308	0.0417220390826497	0.209585578086578	0.414785917793939	0.0457083203546085	0.109420283524487	0.127182057986633	3.39549126635212	0.746086023448777	89749	12.88
CD3-CD45.2-TCRgd-TCRb	clade110	SmallIntestine_C57BL6	-0.106951088777012	2.83106050993183	0.0730439833630607	-0.0604917046299521	0.202863227211236	0.10966766260389	4.11423967480789	0.487785890761954	0.0249846372359263	0.0847441231530554	0.186322898308871	-0.0833546000236189	-0.0882023251892301	0.273348740035009	-0.0395036750191354	-0.046968992373023	0.0815739169110252	0.000868523168820863	0.109934656618277	-0.0220983725482786	-0.0286347255383915	0.296898098329817	0.824644092427757	0.357360129928745	0.828609468313608	0.239842536376347	0.377211679375109	0.165327467637389	0.00752368053706833	0.0123948132848122	-0.0728478216922291	0.896325772009406	0.358939505428207	0.340048791414507	0.0268037985769783	0.0663381704039146	0.0562312959908576	0.673760098126047	0.109351955406958	32234	4.628
MHCII-CD43-CD16_32-CD5	clade111	SmallIntestine_C57BL6	-0.108404511953594	1.49070031975635	0.0406665032472592	-0.0715224716353869	-0.0257640935175985	0.0565693802763993	-0.0312889405038286	0.00232311885706555	-0.0804197363273886	0.168384511680348	0.20113652066645	-0.0604899477174939	0.62866096021472	0.00180804211530152	0.211013816154869	0.481218933904645	0.173103569818484	-0.0664598555035362	0.838461517768091	0.0850716819352379	0.0615333935775495	0.121202172063823	0.758899848504747	0.161881981831265	-0.0306251043817834	0.187653734141221	0.979519324297189	0.099549622499978	0.200905313047862	0.0433501474213356	0.0444780721497557	-0.00161700563806387	1.87901598767002	0.358528214031935	0.381708228644096	0.0591870114917367	0.776038258961799	2.61046639296719	5.2046363360405	6907	0.9916
CD45.2-CD3-TCRb-Sca1	clade112	SmallIntestine_C57BL6	-0.106867123658215	2.80023736371985	0.0427152030597875	-0.080708783727972	-0.0101697082218127	0.0330818881828184	2.99800118026028	0.240908051055567	-0.0299277002260302	0.0970189172728377	0.118790890781783	-0.0923620641155164	-0.0797794065432909	0.113871355691381	-0.00365872878745554	0.166643025708779	0.00382631155345756	-0.0121416221021455	-0.0236934637892291	-0.0360337755708077	-0.0325463007488223	0.087639251353333	1.1591305553771	0.341569894850678	0.0954269983484386	0.278947263477324	3.99696204187584	0.509838380798488	0.00910137665174439	0.00955086025610089	-0.0667883947198792	1.28992454516392	1.23463335133136	0.296097191234712	-0.000878486442730137	-0.0420662666734659	0.00721393551927719	0.71426019402642	0.135488744252476	5126	0.7359
CD49b-CD11b-CD45.2-NKp46	clade113	SmallIntestine_C57BL6	-0.107467968563285	2.57542814633324	-0.00544539186400115	-0.0800667291040728	0.241484658115961	0.00376334661875382	0.0188230756330986	0.1633296551772	-0.0875183457854982	0.0680162259091791	0.00709943759223635	-0.0960636568227444	-0.0848374679572975	-0.0165566297549953	-0.0250942232770749	-0.0702948028924349	0.390100470109623	-0.0249906173854136	0.288845378832242	0.00357232339802559	-0.0212596568842379	0.164799751143074	0.25420273506602	0.18773345706143	-0.0542794317192799	0.0958353054842643	0.397156700542026	0.642301842356722	0.0544053621621051	-0.0215689713427249	-0.0800516343733534	0.0302002625787264	0.146330975470759	0.232034806793911	0.0280926625738329	-0.0205925562561205	0.0663958532171502	0.585463624303237	0.197210410945769	4959	0.7119
CD16_32-CD34-Sca1-CD64	clade114	SmallIntestine_C57BL6	-0.077526566190322	4.58734527983216	0.359001616464885	0.0501736214782062	2.22988282219267	3.85204141144317	0.927640275564115	0.369248025629322	0.050673767109045	1.57096787706792	1.11826749825304	0.0577971460232212	0.976735477955673	0.233358433002641	0.622603015322384	3.7724457954271	4.97825873188063	0.649546971793487	5.05169045644051	1.19258750567297	0.225678315967201	0.221042833917593	0.427838759497928	0.62844096228932	0.101624963961585	0.440614089027653	5.20180891377808	1.16960463147836	0.133501935466645	0.146504097587481	-0.0147173896436721	0.18127133033814	0.266371914553427	4.27328044549243	0.916816692807868	0.213175016509028	1.40444761603743	1.48213360042892	6.65539547812792	6233	0.8948
Sca1-TCRb-CD43-CD44	clade115	SmallIntestine_C57BL6	-0.111351139385678	2.14385969644704	-0.016961090476051	-0.0967963926330511	-0.0983495612956051	-0.0437950940921083	-0.0538723206809605	-0.0645578277279338	-0.103556454430443	0.0717602577488736	0.00685957780027951	-0.102257515234212	-0.0458708880178769	-0.0658695302673985	-0.0384375766491843	-0.0797760003037404	-0.0392748084345332	-0.0245094674295387	0.00391260178442642	-0.0430679739176715	-0.0491550169388025	0.0623046485094885	0.268132612998648	0.19677345881285	-0.00209444153145276	0.346965323593738	4.58604236231785	0.673279331074169	0.0352469779062743	-0.0451691268215809	-0.00242365070283253	-0.0373732970276155	0.130644385435731	0.114143595437818	-0.0406065393628113	-0.0843670077554655	-0.0128081300495765	1.49227221338606	0.266103556888027	10983	1.577
CD4-MHCII-CD16_32-CD5	clade116	SmallIntestine_C57BL6	-0.0881247332737761	3.94812760799067	0.396991052501806	0.125435073491042	3.65552779667549	0.966509178931912	0.41099347093201	0.311250856313697	0.0293927690654469	0.933334169402287	1.0341099409708	0.0516920430979297	0.792231352465203	0.267442544183176	0.155271276657186	1.99171065735425	1.47792869808847	0.0887123983752092	1.39427418102399	0.360311876976101	0.541518386135023	0.917468767450048	1.28329315491377	0.947866226235864	0.199096822087516	1.42261818551347	2.19861487912624	0.56828202917686	0.327294601884187	0.448748598091944	0.134080114433209	0.398784325223642	0.534703240020379	1.4464010592109	0.699083461920309	0.614318008135207	2.6633224458674	3.89790438864486	6.61413653283619	2201	0.316
Sca1-x120g8-CD45.2-CD4	clade19	SmallIntestine_C57BL6	-0.107727967913253	2.90056759381314	0.0864001994454505	-0.0519088447011127	0.556796253866222	0.174541809909972	0.0787866123966955	0.0999856426251957	-0.00114032492538684	0.299577909208699	0.38351949055938	-0.0382302450266956	4.21673163518992	0.570049395390849	2.17773203816995	2.49163183101016	0.246533082940292	-0.050242840599257	0.36665334755199	0.0188913113068174	-0.0142984382076541	0.712714358500031	0.73972802656128	0.379807918863693	0.114891501744741	0.746571079322398	5.76903892555634	1.2161878887596	0.14762350863738	-0.0322120106342885	-0.0744774114134797	-0.0383612990789965	0.18555965328281	0.168279395306583	-0.0322144681766347	-0.0658721829586955	0.0573603447947821	1.56379492209481	2.0500032387884	3177	0.4561
MHCII-CD16_32-B220-Sca1	clade2	SmallIntestine_C57BL6	-0.110334487054547	2.25873450637044	0.0368294891699019	0.983268027955394	-0.0219665582773891	0.0141830936191723	-0.0535982972710405	0.0131322982545342	-0.0705410125293903	0.111813654048441	0.208538020292411	0.144330687751745	-0.0642277161354702	-0.0454309756146192	-0.060093680382803	-0.0545534460046002	-0.0267940735797417	-0.0784674213542291	1.75984318768739	0.223044131426496	-0.00262870621689181	2.11776600202543	0.305153626456873	0.183284973849486	-0.0327024938524599	0.153262936130663	1.56239944491567	0.120875825499116	-0.0417817558487474	0.0948052390460755	-0.0589836364074721	-0.0161278034880021	0.0185410262287404	0.232268691239142	0.113198651466573	0.0663024476754989	2.9042413948813	1.16708625770472	5.29307472965636	227103	32.6
CD16_32-CD45.2-CD64-CD34	clade48	SmallIntestine_C57BL6	-0.0921809577390881	3.7493394506858	0.269945874878823	0.00588892413725391	0.511578274844323	2.77873875565209	0.507529068250338	0.293330842576011	0.0266768679731731	2.51580399002074	1.04144804973528	0.0776710119055446	0.581633282601418	0.070004029928728	0.290955488741015	1.97290316959278	4.57179540952359	0.788113484310097	5.91303132623955	1.54276370292161	0.16159632967121	0.0350014715693429	0.0984759920501616	0.218134866582058	-0.013098512690465	0.128935149833132	3.07844787487777	0.384717043775341	0.050068716986391	0.016623554348406	-0.0462413326367228	0.0488863567296491	0.104677013039449	4.00440815643551	0.938938039384507	0.198167490997012	1.26596127494893	1.68982407374831	6.51476280505015	45576	6.543
CD5-CD44-CD45.2-Ly6C	clade49	SmallIntestine_C57BL6	-0.108074085910527	2.68928357894766	0.0126516950393882	-0.078273335608478	-0.0383250654504662	0.0329809561957662	2.39983462075632	0.182402080515079	-0.0511798274733487	0.0782334791839178	0.136769767583307	-0.0781007031200049	-0.080626994996294	0.23420501500676	3.12891992936347	0.20090481912899	0.0877243927467914	0.122916445478607	0.0192470644876162	0.000429437516203045	0.0348543127744167	0.0157508310268043	3.56711075313097	0.510567479291716	0.0195901395049728	0.285183675655947	0.800473327886449	0.23193891319187	0.0025230100931141	0.0218771407416924	0.0156960432173681	1.80673925585532	3.32381161559142	0.519608658722516	0.00385829651345239	-0.0580600678338384	-0.018541875480538	1.31826708290368	0.358894558801311	2230	0.3201
MHCII-CD11b-CD45.2-CD11c	clade50	SmallIntestine_C57BL6	-0.0950485787596333	3.30930587736258	0.183161060836787	-0.0280033901867662	2.68388345879876	0.783198762802607	0.132618851631985	0.107497239562515	-0.041818546987074	0.463660617033458	0.477271237327593	-0.0412528330441566	0.0490828559352387	0.0460447692740821	0.0899304078880478	0.11155744066001	2.56326528710868	0.199060284971665	0.666781803892529	1.28477105779878	0.415083416009549	0.513174099090997	0.7430215059046	0.529043503047576	0.0505963402186006	0.371827677121451	0.986673159637535	0.188651323444711	0.12892677556166	0.137166556906893	-0.00942379871718772	0.139194977131163	0.261622703522901	0.783262359099278	0.315850126432248	0.330019166528975	1.3477216921054	1.42485747041485	5.96154664133229	32152	4.616
CD44-CD45.2-CD11c-x120g8	clade51	SmallIntestine_C57BL6	-0.112432587044247	1.59978472902591	-0.0279772276697931	-0.0948646489913456	-0.0696028618403038	-0.0436512510728412	-0.0542935842519808	0.0270970815542567	-0.101054287446045	0.0380338980691433	-0.0117041808046235	-0.10417609662239	-0.0205467142416519	-0.00551059609634146	-0.0403574375092723	-0.0747776486302223	-0.0291858078737599	-0.0975325814460399	0.26884958885985	-0.012716914415668	-0.0395944862463925	0.0790757290113313	0.226326872629059	0.0925072642791991	-0.0677738567264552	0.105655274604722	0.382385748153698	0.0832702729471584	0.196091338417003	-0.0338024891050459	-0.0449026385180526	-0.00605997762897453	0.506240574199606	0.149721797477407	0.0104021851257686	-0.0772723115616216	0.017582845787656	1.92547917249209	0.413003124533265	19332	2.775
MHCII-CD3-CD45.2-CD5	clade52	SmallIntestine_C57BL6	-0.108264319980622	2.73987189036038	0.0265636911498462	-0.0726866555995606	0.00239687767304646	0.038906210342291	2.92056414978041	0.244281473335004	-0.0291831108068499	0.0770888049011058	0.131252059655316	-0.0898143644817182	-0.0883084399900634	0.272904140417202	0.0475473174424685	0.0666115886236026	0.0594104221493011	0.060332008094725	0.0333390521901566	0.0238366098168882	0.0583760856538748	0.0608064660639641	3.08700775934777	0.497885669878042	0.0429836602772765	0.256677611391647	0.596521012409063	0.0716785208686916	0.00567748319538068	0.0297653890701984	-0.0198879351427652	1.94946290402308	2.9529916965013	0.501014318981873	0.0200891464866001	-0.0150336764869307	0.0258946925099458	0.496162064907749	0.421241950964573	14733	2.115
Sca1-x120g8-CD45.2-MHCII	clade55	SmallIntestine_C57BL6	-0.10617912862945	1.85209406233377	0.0658224759613802	-0.0672102910498546	0.00693938268186967	0.166155721092814	0.0313428517988348	0.0349419769994849	-0.0452548153749783	0.252539912175979	0.246469240360503	-0.0511254454146753	2.80150271279929	0.23771952386016	2.10384538937916	0.264622889269475	0.103631385809438	-0.0430644629442971	2.49416176963057	0.325879010484287	0.158562621486677	0.0515267086964401	0.549280881644199	0.197831810473005	-0.00449360957159803	0.300356625109131	3.33984829428386	0.509921317420014	0.117791844819626	0.0266172234589631	0.0610851458612952	-0.0152081516561904	0.828604880342972	0.224458174372132	0.277320965963269	-0.0256804969724015	0.207876754750796	0.943853158534202	2.52729619035577	60694	8.713
MHCII-CD45.2-F480-CD64	clade70	SmallIntestine_C57BL6	-0.0977205618329409	2.82201230492727	0.141249340175787	-0.0386328473561934	1.56332490938944	2.8984857727376	0.403082417854215	0.131905687151845	-0.0314400029906946	0.409315462793984	0.519295057533102	-0.0442738609041167	0.193467536941085	0.0301449552576626	0.136014710857732	2.5577075081119	3.05609877007673	0.264523146144228	3.27413292076169	0.780704672950474	0.184172815190767	0.235844927926382	0.207675299659115	0.359307866740791	0.0171713042526374	0.223072663413254	2.12797462386001	0.571950078480881	0.0467794817991019	0.0666446147515535	-0.0297095753948738	0.0933275763826922	0.141483967615374	2.81368187501744	0.631748427978459	0.169434376049827	1.04116246486117	0.724318324896257	5.79475526555738	45293	6.502
CD45.2-Sca1-CD4-CD5	clade8	SmallIntestine_C57BL6	-0.106181489122993	2.79080656803659	0.0554907497627972	-0.0581623250705811	-0.0576379463133413	0.0547870526893593	2.82897772297991	0.249085052659874	-0.0182397124226722	0.133053353134224	0.233440587456701	-0.0765864040438777	-0.0419762339545477	-0.00952919337963518	0.0437864935396976	4.34982480767296	0.504285408135716	0.116526155741013	0.0509732693750998	-0.00636982842556794	0.371367660446666	0.0549875979416206	4.20110332737967	0.659017476465287	0.0154962150040815	0.179022272973381	2.42904617959992	0.264835035698046	-0.0215160559933621	0.0577735196280306	-0.0245879267406161	2.03215341727228	1.86622794175123	0.319967788205266	-0.012704238623108	-0.0551276249494304	0.00575266122738853	1.79438513540978	0.454590648016098	65915	9.463
CD8-CD44-Ly6C-CD5	clade10	Spleen_C57BL6	-0.0474984916057286	2.94487339944984	0.435781877963441	0.169877209529855	0.00613709445870084	0.064666205327275	2.95404641163215	0.334985276071095	0.0409122392453781	0.0677107213596336	0.055210829410239	-0.0168723789060236	-0.019768955444223	3.67743419075292	1.69932164211575	0.343685691017367	0.0816560200027346	2.43617961884023	0.522401007424656	0.103890204372884	0.169814187471146	0.246678427074931	3.74912973373199	0.481861855997665	0.0833580500931184	0.463357099158763	0.773885866092573	0.131771342165308	0.0592971241369892	0.113171673033826	0.089837516338048	2.37528704903236	3.50756452918595	0.539660380629774	0.0742866208637078	0.00220151755936882	0.104964403438918	1.50261955846237	0.458374459942408	257440	11.98
CD44-Sca1-x120g8-B220	clade102	Spleen_C57BL6	-0.0512552858236881	2.62099710149068	0.457383744896693	0.230090990491769	1.48630223521665	0.224494245636102	0.163878594966989	0.0893952618087845	0.0404789198276973	0.159873226842245	0.159083506127181	0.033417321318009	3.93475468835881	1.45363298432421	3.21359173722981	2.19454609935524	0.386412142888493	0.0766163162682233	1.02114471670779	0.103089086102498	0.0988364637251778	2.13994584090065	0.604937212468667	0.0929470246080185	0.00830086767307294	0.224469804224683	3.2020249250428	0.368092675367915	0.359825861845984	0.0312252478573518	0.0282180764191839	0.10141001722909	1.04955294267586	0.145796310827772	0.0713437832568227	-0.0168297584845634	0.274868738802665	4.86308632871849	1.97713674511003	2023	0.09414
CD44-CD11c-MHCII-CD45.2	clade104	Spleen_C57BL6	-0.0314287562204224	2.83163875442457	0.849653166093022	0.262048617832249	3.57972397812138	0.68961199253054	0.250770739148785	0.0875793172096832	0.00160821951869887	0.291688460487266	0.236758242767632	0.0253375646098438	0.224267818559937	4.21058039510188	0.717007738774736	0.755512189553045	0.438838483314769	0.0785929219670551	2.04916970833919	0.32945061842568	0.473251015214738	0.532083592441371	0.934497886658098	0.157566030219368	0.0312084149435332	0.5873790378975	1.41271677240582	0.138281737208398	0.921223418525835	0.160851475608204	0.0205421147231371	0.181268385004036	0.575414561325353	0.308202064677995	0.231242919048087	0.156888719156187	1.22142060245257	4.62283478560347	5.09311040647746	5263	0.2449
CD44-cKit-MHCII-CD11c	clade105	Spleen_C57BL6	-0.0504602662266738	2.05757397775154	0.47136680451359	0.1848486581369	2.05556375706368	0.351982503186059	0.112403122681826	0.0328097550139767	-0.0202292891159797	0.593409771585259	0.196877483829813	0.0125857839561625	0.269281643879821	0.292077044656822	0.383364568746589	0.223966944294952	2.01681492276628	0.315245167200855	2.26984657630071	0.528104198559478	0.298090250923657	0.297641634656013	0.718543150906287	0.0641813332446158	-0.0204767459428008	0.155223887918364	0.770625518601016	0.0258526433732434	0.603389851592683	0.0558445448145317	-0.0127295788192049	0.110256506821488	0.806891812208526	0.192506287547592	0.124286716911941	0.0311779337666259	0.47132627920058	4.62552826236278	3.50916870064543	3036	0.1413
CD44-CD43-Ly6C-CD11b	clade11	Spleen_C57BL6	-0.0501027751697384	2.28979656521776	0.394293328508152	0.1786251721535	1.30322859881556	1.36978271352189	0.142385778599621	0.019361536755581	-0.0303412652501851	0.108155252645826	0.526546199919577	0.011878819363625	-0.0188485229402441	0.0388298189457923	0.338517326577597	0.0228988704629385	3.95507906610198	0.530631300803307	2.67083051927583	0.451201280712623	0.171517735783065	0.228145117728718	0.195248699660911	0.129748787344761	0.00734526677740943	0.0514897613164902	0.86056546625693	0.0193094413032912	0.167277383746237	0.14541082838496	0.263041744381218	0.124381093466892	4.64887520111216	1.15649150146655	0.208965101050759	0.0295615979530231	0.203657308595751	4.69793604701384	1.21709329109302	8019	0.3732
SiglecF-B220-IgD-CD3	clade117	Spleen_C57BL6	-0.050556157527893	2.01334885096206	0.320773765234057	1.02497030365116	0.0193368628858099	0.0150710027248679	-0.0135365184554073	-0.0210628861377158	0.178103635311483	0.0224025284043087	0.0113828854266714	0.851107466264749	0.0213984401644673	0.0292371186409942	-0.00970713248861494	-0.00677663711255584	-0.0140396363100182	0.00347716335810131	1.30978900180442	0.332738554757988	0.0283062839048218	3.26354463173019	0.481991622331147	0.0611830691187056	-0.00644852645756228	0.170580758162744	0.898099466863914	0.0200752069587254	-0.033739837907309	0.0778855947823805	-0.0446780211885296	0.0119634059480631	0.0581674691085462	0.014942323135358	0.178439415786594	-0.00239628809476275	2.10635396616551	1.98261200276507	3.0607328527487	23257	1.082
CD44-CD49b-CD27-CD11c	clade118	Spleen_C57BL6	-0.0454816223112347	3.17302846362431	0.366404685971344	0.175326746509585	1.36684918330702	0.165893663424668	0.0850745793789126	1.25625194207721	0.0967318819796582	0.0813329621194533	0.0373202929259704	-0.0292204568236387	-0.0448651111393747	0.0728853085955711	0.119144129686404	0.0444262664886872	0.590291201933398	2.41474929936009	1.11042463291492	0.154039132873739	0.139592398321706	1.63334450330491	0.449686315836076	0.137731052793324	-0.0243660431751429	0.108910056028236	0.369720158618992	2.75761309611956	0.481587748153345	0.0647471895453599	-0.00638993947348121	0.089714739046651	0.801221443645819	0.177298482349272	0.0153811556795093	-0.0326627583241259	0.182749644141372	3.75107525383762	0.972120615638544	9636	0.4484
IgM-CD44-CD16_32-B220	clade119	Spleen_C57BL6	-0.0407877924052797	2.46038865718231	1.3358444450985	0.368008031830532	0.0670648918547492	0.347537523161513	0.21668753897242	0.220524527439091	0.0416644088274661	0.3625557157	0.415796941372082	0.697199999792203	0.516912490365379	0.262115307608833	0.734625248935911	0.287614664470843	0.198420956133074	0.272840559381274	3.72262093629781	0.882315453919148	0.317387264673285	1.27848264804248	1.12643685058768	0.349924189419722	0.129547051342571	0.515469856268252	4.47842635314192	0.741118220011233	0.230190927818743	0.111904757361864	0.101190631866928	0.144759626151807	0.779356018595624	0.485283314741969	3.5750810840235	1.32092359090468	7.02590376815229	4.66489620639325	1.69310402806825	7612	0.3542
IgM-B220-MHCII-CD16_32	clade12	Spleen_C57BL6	-0.0506727259505947	2.20984531336396	0.435050284748104	1.00228826903499	0.0160653664888327	0.0319250549202345	-0.00646573661915879	-0.0014223517800911	0.16413247074644	0.0513586218593519	0.0453499960317236	1.0699911549585	0.0518302441229464	0.0468229255141914	0.00559264953280408	-0.00239164746925825	0.0107424825660623	0.00422083655216066	2.09518900821209	0.325864714489717	0.0675526584855251	3.82885219816188	0.646476808726189	0.0988101364169724	-0.0152889962293926	0.192583079492114	0.946025199085922	0.0334814369131623	-0.0255167793853544	0.109171340657931	-0.0324487972461373	0.0330794314454652	0.0922093637284484	0.05248260955359	0.114726812964341	0.0671011479501601	3.91310523007802	2.40560304738622	3.09275888976628	79792	3.713
CD16_32-CD45.2-CD44-CD49b	clade120	Spleen_C57BL6	-0.050575359875157	1.33393012713716	0.403570354566369	0.164371377890441	0.0301138362393747	0.17985254447618	0.0229703874227668	0.0349036992551894	-0.0387217231392872	0.462110382377886	0.0710815054157668	-0.0151963693883398	-0.0213584793360478	0.109833507064623	0.0919390410315653	0.0306538846017865	2.29592947364017	0.403672036567319	4.44999021656335	1.74104788121502	0.385272343293838	0.191892899567508	0.194031914349339	0.58399918794855	0.0112301829593282	0.0520157609796441	0.482294105000809	2.74859839407056	0.204344095991599	0.028707567161871	-0.022569851779243	0.0624210299507741	1.43203856603792	0.138424788210339	0.272483965342452	0.0118404790516788	0.264546592300572	3.92144679436004	0.934728956650511	2207	0.1027
MHCII-CD138-Sca1-CD16_32	clade121	Spleen_C57BL6	-0.04228531222727	2.0453186767081	0.803006378492812	0.292292579630411	0.0794071561929776	0.270309978368902	0.140118423155462	0.0928495465276214	0.0268570903885682	0.295611011482385	0.213549927874467	0.65265968815849	1.06563335629215	0.297875014230119	1.10036929452998	0.427632295191098	0.422293107173484	0.180134536201784	3.00710731849521	0.602128246313424	0.296657930555435	1.67164301362964	1.27274997574099	0.232910828603009	0.102099683747419	0.563438171971322	4.54525485674785	0.784871739094267	0.182369113401582	0.16620018484408	0.0923690837757637	0.114846338322645	1.62620043594012	0.334193207149632	2.83981952525757	0.558973750638526	1.17997740206549	5.32696494304824	4.44823955502218	2425	0.1128
CD11c-x120g8-CD45.2-CD43	clade122	Spleen_C57BL6	-0.0495719555346123	1.73961197269439	0.411105477648027	0.192299659149287	2.32457714288686	0.292051641095497	0.116370179483033	0.0432020352360798	-0.020420876876162	0.384446527397539	0.231504156540849	0.0126677412673728	2.27346283831757	0.51512881502004	2.90135497376641	0.466035081184269	0.812333498541202	0.215349972490661	1.55733139836623	0.260000405660089	0.224156348171142	0.3881742718078	0.494976510599279	0.0405346319157362	-0.0293668132782209	0.0762811074722086	1.048366182995	0.0615892448237874	0.169225265068791	0.014006780271101	0.0180351281170536	0.0897816583960505	1.74446146685179	0.204160611727992	0.0411821032188569	-0.0234094382123052	0.247653197652329	4.25283856940612	1.57451480112047	1527	0.07106
CD44-CD45.2-CD11c-CD11b	clade123	Spleen_C57BL6	-0.0456050521436143	2.93749113227075	0.446750362204927	0.188452639702854	1.54161438311992	1.16886217702909	0.173655959885127	0.0356048788611351	-0.0181061556211642	0.359820551950434	0.518609983026647	0.0402126592174989	0.100390362802136	0.114613002966046	0.806488817003203	0.204383058085573	4.14469123411053	0.676815654793717	4.13917722900115	0.976508818958732	0.302860452881966	0.208703596007568	0.323777093291579	0.0519213965370013	-0.0244090160393591	0.087095545570456	0.860767917646857	0.0366149064887712	0.0381764867968627	0.00897307163116923	-0.0231984566819107	0.0940064755030947	0.566157186069093	0.915162691321197	0.281089854795152	0.0532025695538079	0.58333154881151	4.53421790662343	3.85730184508263	2870	0.1336
CD44-CD11b-SiglecF-F480	clade15	Spleen_C57BL6	-0.0354790430609145	2.55002040755788	1.06738256890353	0.230238408944953	0.125579053284154	3.07908383547372	0.454553403615639	0.155186763732547	0.0173718775122104	0.666009921830531	0.295128552761213	0.0245123514434521	-0.00210457742067589	0.11893094277646	1.66917372052211	0.204826723220193	4.47480554348267	0.73641912665055	3.17145413688504	3.7408594622419	0.831467149003082	0.334803601830205	0.189317001977344	0.0531247063614079	-0.0221416689961683	0.153109879858768	0.714545163554718	0.532879860440506	0.0258671130606169	0.0164096960160086	-0.0146998517027889	0.11514966989171	0.941691859279967	0.195590926776286	0.12699460320231	0.141884952223122	0.414310388569366	5.70340275353169	2.0294444932383	8007	0.3726
Sca1-x120g8-CD44-CD4	clade19	Spleen_C57BL6	-0.0466038247399428	2.97069943873425	0.643791309875716	0.255390206743545	1.40238905179373	0.275984878964578	0.240444794102176	0.164288073617708	0.0970153311859725	0.202224521776191	0.250033616768294	0.0588783236817276	4.69624985847766	1.67181783199289	3.45014583498995	3.44249082385232	0.503742936505646	0.06506017503358	0.728904663681069	0.0692060896345649	0.0855733984745681	3.2875601359382	0.732113046514604	0.182849358159347	0.132073316488172	0.757751859578301	5.93098426685332	1.24978971640259	0.305445767327543	0.0215814589749229	-0.0190900540138873	0.0334289016536174	0.388185556842023	0.0477263186750912	0.00813076592774085	-0.0297540163065795	0.217535051888092	5.41482136751324	2.18044767284196	6213	0.2891
B220-CD16_32-Sca1-IgD	clade2	Spleen_C57BL6	-0.0482210311891163	2.71205234698878	0.543015917922868	3.18296710777778	0.31798257698849	0.116141775999377	0.013901628877577	0.0287353589344251	0.463782645774957	0.0971426394569519	0.0929414467778186	1.48948935491205	0.0987347117689949	0.105421007561532	0.0199690872600683	0.019970273035359	0.0380471676402777	0.0204037345171896	2.29303999336126	0.659314631070653	0.10592792685794	4.4264627971135	0.759724603080113	0.127746870266406	0.00282994278013144	0.162230706849156	1.9332803202499	0.135128180563383	-0.00647849995379337	0.214068095752558	-0.0293213733166214	0.0354138402584074	0.0785702037669627	0.069910399028339	0.120731181043449	0.0523784569625761	3.47194602839405	2.26138197529508	4.04032724300775	1257813	58.53
CD4-B220-CD45.2-IgD	clade22	Spleen_C57BL6	-0.03479951806076	3.32696886329477	0.791326318086561	2.76765426486516	0.310379542077376	0.187606395935499	2.74043857225605	0.327522888427497	0.430794669262992	0.164538282632418	0.161325966795176	1.18109357790347	0.108976736643553	1.69780922197504	0.912845917461283	2.71074662789537	0.50062613477683	1.79347744035587	1.95708055576667	0.538552980906501	0.394312560066106	3.85669777165556	3.82825331672954	0.569781682766944	0.10497325049089	0.466099971468346	2.34154044075054	0.247437090747631	0.0624104052850355	0.288171904643262	0.0973319435631495	2.20763078737404	2.16834187623276	0.369983343751579	0.149484697703292	0.0610857767877813	2.98890770365391	2.67475094927176	3.626483994161	4711	0.2192
Ly6C-CD44-CD11b-CD16_32	clade26	Spleen_C57BL6	-0.0474301143925959	2.29960416038126	0.483467116743754	0.186133492244497	0.0473816349025341	1.43249138702081	0.15414692122051	0.0425537110269096	-0.0206511968094523	0.617683493856969	0.776446753987842	0.0748103265897238	0.166360361831917	0.133313298585321	4.69523878266455	0.752070255767662	3.97254517888449	0.469716237757471	3.19339809453891	0.516618060436878	0.128506611754224	0.150425269511065	0.308826623840944	0.0205385215740438	-0.0355465858223462	0.049671915192755	0.579063472280509	0.0022475224032591	-0.00129639009902683	-0.00894706881269166	0.0630201718499846	0.0752322410099402	0.564084306032477	1.04712178315944	0.207846639609487	0.0140017972979118	0.321883434865641	5.17233927707036	1.7726411832519	19027	0.8854
CD27-CD44-CD34-CD5	clade38	Spleen_C57BL6	-0.00119196808780031	1.2008045580209	0.653142482788606	0.217650744426243	0.0278262618285698	0.136564329488464	0.0620049779820371	0.021222444541974	-0.0290916745804912	1.27034170766051	0.273940715235987	0.0396795557557794	0.224749325118407	0.139649723202089	0.11694564973357	0.142601792585099	0.251467997934185	1.62450181264135	1.0977577590745	0.925810747482438	0.277256737434548	0.373010401875003	1.06594333532035	0.102645720444631	-0.00957705583429467	0.233911526521496	1.2446943341296	0.350001570481421	2.96900965137853	0.50823374218125	0.13221057752255	0.135860560648441	1.53468267027564	0.226586386695527	0.169267398351341	0.00946419053449478	0.430740508826212	4.70023313977037	1.65558934794513	2360	0.1098
CD44-CD43-CD49b-CD45.2	clade4	Spleen_C57BL6	-0.0494226174956627	2.78613957821351	0.323700980990362	0.150633770967558	0.800324710052403	0.082970007185597	0.025314004949129	1.1423868638041	0.0688307281985073	0.0379075640588051	0.0128695873813806	-0.0355104460092333	-0.0536546378304577	0.036835539135036	0.51018446410615	0.0318723778705293	2.64456907095895	1.04816123432253	1.27079073356562	0.14879964147202	0.0715393975112422	0.367751866345297	0.187353805667072	0.0733794781384322	-0.0355011130068662	0.0528721680444987	0.257486680994059	3.03343344423075	0.375276527352061	0.0929112110721355	0.0782261962558827	0.0560301803170316	3.1226329002956	0.473548330868277	0.0618319038388546	-0.0265871368619458	0.0944823017976214	3.14982599815475	0.609004905674328	46060	2.143
CD44-CD49b-CD43-NKp46	clade40	Spleen_C57BL6	0.102293516338869	1.72173343378154	0.341265742746533	0.200103631131007	0.253061622011957	0.0801673193176385	0.0874850014528172	0.199356399474626	-0.0125495291759454	0.064392129987835	0.0187211316836159	0.0782199482456521	0.000961203165590089	0.0711656699235468	0.149570936639924	0.0649933747919301	0.345065436511269	0.412012192409156	0.483173024170152	0.248694228484419	0.0592865450562569	0.559073836712523	0.470382146086956	0.0453453598562035	-0.0244500094445934	0.0802694120961626	0.457318041055639	0.466850970431384	0.167200830596356	0.00399278819289634	-0.00171791671770604	0.0989980572460464	0.586508659000429	0.093389542614849	0.0699470835441227	-0.0319672706966358	0.45716617214254	2.51535038900647	1.05901850349298	4345	0.2022
CD44-CD64-F480-TCRb	clade42	Spleen_C57BL6	-0.0131603992220983	2.67176464300095	1.22922279060974	0.439306693452302	0.669137393543075	4.16903280278518	0.846171750486648	0.245408775632061	0.0570675789131179	0.269373196179725	0.779966066287426	0.0660904298933366	0.16205839445252	0.202390105319316	0.137342075843712	0.950840967631151	0.530911274955519	0.125370837961986	2.91606328122308	0.546357394992924	0.211411649496403	0.815606771981762	0.496657908170805	0.218891379775139	0.0460229191528667	0.290101038963727	1.94544623384316	0.328136199822783	0.0647713037188964	0.104917488093456	-0.00839390525145735	0.609549158881511	0.301716716059111	2.6106878494777	0.497087966247005	0.111580791715816	1.49455114742914	4.93006587848883	2.79586426364106	19829	0.9228
CD44-Ly6G-CD11b-Ly6C	clade5	Spleen_C57BL6	-0.0296078792000472	3.01042025029934	4.23910582141137	0.422943524002447	0.168805202813654	0.737250240562335	0.283477569920683	0.719564934912085	0.177305474469971	0.781543403558526	1.05402642790418	0.169790888073161	0.150817620112899	0.650072946363066	4.51194651127923	0.708221898200728	5.67865423467958	1.15221482077704	2.43230772424403	0.495142011224214	0.0861267182177192	0.101228355993492	0.0710077102922218	0.0980569837846452	-0.0019145178824406	0.120044597618158	0.705197482679498	0.0183582335799566	0.0210190216693961	0.0472466675454695	0.0736587558058226	0.0795311608072714	2.07265114809847	0.303700898484974	0.0972207806444097	0.0513155788651168	0.349294675542987	6.07085924299776	2.26780180212485	37449	1.743
CD44-MHCII-CD11c-CD11b	clade50	Spleen_C57BL6	-0.0379625788066471	3.39956347539024	0.685743293142355	0.227319624469983	3.51085520269026	1.25222182211057	0.252499642164194	0.0670240106564818	-0.00832250998149578	0.202809347471199	0.158499548902264	-0.000405029553283006	0.0112049375416842	0.173802817949469	0.098635240294449	2.77474445345558	2.24148106535118	0.230505216326235	0.644659831751954	0.118868418797988	0.437501115660751	0.471875773421165	1.21348153394722	0.170250837956757	0.00614117882904714	0.385972476216608	0.928283395908504	0.0670523148561064	0.668066760645295	0.101596576787164	0.0130388025359036	0.150706251193808	0.294687536700775	0.289309811369816	0.182348862133846	0.112605599436655	1.08207512121098	3.12259859350413	5.15792958772158	28643	1.333
CD4-CD5-CD44-Sca1	clade8	Spleen_C57BL6	-0.0467468358240055	2.90878919710385	0.485368997298164	0.176445452973737	-0.004855139072481	0.0659594260010697	3.18008154384275	0.351072150194476	0.055568932518413	0.0692028012399508	0.0608793113981669	-0.0232965975651696	-0.0155048033305276	0.131303412701072	0.438464441399853	4.93509542914641	0.845353090927716	1.71457832637442	0.340211413397236	0.0757519890181476	0.47728418761557	0.194317750741261	4.48726543662162	0.658951063263632	0.0705392612812183	0.414062855280343	2.36543623466724	0.215423352395605	0.016466485376528	0.157648016381418	0.0930903406173507	2.63521639626379	1.55106299707402	0.195446693717632	0.00141481299922641	-0.0457739761751209	0.0912470129355281	1.93797888316883	0.548201535278466	289260	13.46
Sca1-CD44-CD5-MHCII	clade9	Spleen_C57BL6	-0.0489727692364749	2.18171731468667	0.474483622500482	1.55265006924345	0.0702124314176501	0.0764854387190267	0.0266617552298623	0.010992054724448	-0.00647972200512042	0.0821238246173467	0.105943820270595	2.06814339739437	0.186640295888528	0.0997273148748401	0.0427890214972146	0.0830056109929392	0.0866330444539005	0.0344289842374111	1.66299385637278	0.333284360529251	0.107533814848142	1.02257549820654	1.64989331499155	0.159627940779457	0.0234616362846695	0.441833076604324	3.19886065183352	0.365320078559552	0.0532397441471016	0.0938387298948773	-0.0124976044494877	0.06890315071328	1.1581155781146	0.156024465447866	0.133397875126747	0.0828448821349878	3.66900433986475	3.71888674110832	4.13498331528102	20069	0.9339
CD8-CD5-CD43-CD3	clade10	Thymus_C57BL6	-0.0507878176056383	2.76817994533808	0.275306674242066	0.0323631608733845	-0.028636066908247	0.0328922163450398	3.17124241064727	0.265465062310329	0.0201186038747715	0.0323884322062811	0.0221331243115008	-0.0462819836402187	-0.0161792369881368	3.79974198326062	0.381093090485243	0.432986214196006	-0.0112958456190186	1.71225159399863	0.256681056385017	0.0436384210581947	0.159031669733203	0.0814579275750251	3.89303162765987	0.35053130343754	0.0930131041865044	0.601560713083631	0.320392078325306	-0.0281765549069171	0.0211930484688814	0.243686758873406	0.0550131105844113	2.38364291171737	3.07524498110483	0.282913026137703	0.0154998744351389	-0.000653901786109945	0.0836898130306196	0.697639481304809	0.798639394748376	55943	2.658
CD5-CD43-CD3-CD4	clade124	Thymus_C57BL6	-0.0533772466967791	2.05270410418325	0.224239745488715	0.0218783491566538	-0.0453694622393022	-0.00902102557070856	1.83245231266951	0.0748033700680811	-0.0279100210709299	-0.00317925803894793	-0.0136463576368169	-0.054470818143399	-0.0322086721906678	3.56908106911333	0.256307432923916	3.64502743724456	0.2363840861617	1.3877919315229	0.151969763543504	-0.00741040159328656	0.0253815050676218	0.0190508821830494	2.16481628693847	0.115682282419947	-0.028623154436356	0.0198894233187067	0.106893419110786	-0.0519289589328812	-0.0355736940759017	0.445802894431423	0.0107800947534012	1.32594623725619	1.13409996933166	0.0749001261148855	-0.02708673983694	-0.0538027130191433	0.0231015016565897	0.108426656333707	0.418351250389354	1762199	83.73
CD44-Ter119-CD19-x120g8	clade125	Thymus_C57BL6	-0.0528555125955669	2.03563664365982	0.210640344283191	0.0258228248874342	-0.043662353580373	-0.0123740295250652	1.83643034690547	0.0643558043442087	-0.0287638674317747	-0.0056941208611659	-0.0167217301848994	-0.0531541664518595	-0.0364201012774607	3.85598253965512	0.301879133119839	3.87575740275779	0.258928484316036	1.48283000468965	0.143959490825006	-0.0103692573339768	0.0125084874131004	0.0161015933091001	2.22325858835967	0.0966792182243538	-0.0308767717449	0.0100652124360902	0.0934706978939567	-0.0502684303012114	-0.0360612177498685	0.495588450842918	0.0155462531523165	1.02567967149618	1.11370384887256	0.0712756952416882	-0.0273451888295072	-0.0521116813937103	0.0164751308290838	1.53358115542387	0.302610726814833	26569	1.262
CD44-CD3-CD34-CD27	clade126	Thymus_C57BL6	-0.0550394745340583	1.42445235709846	0.253288182663752	0.0337441412236863	-0.0278463710992391	0.0385581991158825	3.37490409852605	0.294157323227192	0.0321153767138299	0.190447868519723	0.0312023392898989	-0.0482697277430741	0.31016830701312	0.236098902052395	0.00663317961621022	0.178726088964613	-0.0269761239563644	1.74974360832216	0.327704629043237	0.0539779844644581	0.0569087351033885	0.0664189961982524	1.11621655505017	0.0562287909636964	-0.0296107713669727	0.106738365592533	1.58457350913361	0.048543762481842	0.272731042415433	0.184086659602826	3.27715484447222	0.534041596068892	3.03118205545058	0.239841679388929	0.00127586772233966	-0.0430167060854422	0.0389232134390508	0.619255609911534	0.139533515560158	25273	1.201
SiglecF-Ly6C-CD4-CD34	clade127	Thymus_C57BL6	-0.0389266360661667	2.67348938121825	0.610633633669301	0.0636941526554051	0.541410342446162	1.9100278985138	0.278581558653029	0.0776978746171906	-0.0219232615094496	1.70519085873917	0.347119012228096	0.0228474053450589	0.00617586809896283	0.273415482470812	0.726023366849765	0.165475099576993	3.69383652793225	0.364789763434328	2.51860314042198	4.08515566138107	0.856615707459948	0.180348454987007	0.192875785671041	0.0276299808876868	-0.026057268401016	0.122193228475699	0.30051703982906	0.397233054842835	-0.00174408516575655	0.00842638212650233	-0.021889754379263	0.162131048138322	0.404009146715305	0.150247040755924	0.0825066014518494	0.132019171525304	0.393986223654394	5.61406922250476	1.37401443027814	3610	0.1715
CD3-MHCII-Sca1-CD8	clade128	Thymus_C57BL6	-0.0507175714891682	2.05071494261897	0.285827472110431	0.0432857214866625	-0.023536841392897	0.0258864007820703	2.20443315643186	0.106743676995286	-0.0148381847912195	0.00822436334600013	0.00397538189050954	-0.0461378681171204	-0.00572355339604496	4.06654848394806	0.381298495233798	3.95240071921223	0.302798091840206	1.57506489085693	0.257140758188591	0.00211865643185942	0.0243577444362544	0.0509829701032772	2.2247736214064	0.0979358678435198	-0.0250873807419711	0.0271930555104455	0.410010361539699	-0.0331027960523432	-0.0267023460392905	0.457183638726229	0.0180457457176275	1.20068571284437	1.33620920969007	0.126816135643659	-0.00286935968862185	-0.0398986542189785	0.18601941380809	1.59421851174722	2.12842160859081	4532	0.2153
CD16_32-CD8-CD4-CCR7	clade129	Thymus_C57BL6	-0.0523893972724491	0.754238693397764	0.132184026730595	0.00124850506572802	-0.0534291078259657	-0.0476829389087279	0.621381012937768	-0.030913968549553	-0.0553527072332404	-0.0456791595255188	-0.0497310065745747	-0.0662481377960907	-0.0582908083471276	1.40398011673258	0.0265171681302759	1.51743791826266	0.022762265084562	0.342476333048715	1.8443184610983	0.227298262245546	0.045649837640431	0.0074908877716927	0.755683039085856	-0.0115054346831628	-0.0541457282226334	-0.0312788447366048	0.0599819109567922	-0.0566597233522745	-0.0542428708962345	0.0899990737520745	-0.0353483465604824	0.508421916779897	0.547733304294859	0.00208310757226155	-0.0147986307459519	-0.0594353639388047	0.0229416585294809	0.023787672868155	0.0738606699551361	3283	0.156
CD44-IgM-CD5-CD16_32	clade130	Thymus_C57BL6	0.144682316758019	2.34822430193668	0.273985904863432	0.246143970169506	0.110102140411367	0.0645724698438102	0.279531108663148	0.0242731880770596	-0.0209598936177089	0.00620811278829034	-0.0102985156332347	-0.00186256286499691	-0.0108987384139065	0.291590967072155	0.121595295350317	0.513427551163742	0.159761796112101	0.295751482780112	0.416497002655227	0.0237990148540197	0.0123868372617704	0.872634124416856	0.716494026214367	0.0117251815545297	-0.0336482959400207	0.0120863763357502	0.479742614799516	0.232741467110177	0.0198661346090134	0.00259895353756239	-0.0177601937201147	0.346875461118061	0.518052897438555	0.219331835249785	0.127459032159673	0.0164205924373634	1.66231112754945	2.04714625623123	2.27135543022399	4935	0.2345
Sca1-CD3-CD4-CD138	clade16	Thymus_C57BL6	-0.0503240058231146	2.34224737362525	0.296212234123336	0.0335116349272816	-0.0137263418760667	0.0469383273343008	3.41978308443895	0.306364769347176	0.0260086522968451	0.0445155415337759	0.0392214799757028	-0.0443277713670756	-0.0145286256303885	0.467057759246606	0.187969203488641	0.380577107278289	-0.0041555217141739	0.993587460405368	0.188228957571964	0.0243822354921192	0.141719796326705	0.175767935407215	3.49310450589959	0.352822586327709	0.288789573659498	0.393341831131561	4.43954928895169	0.492450183685187	0.035681063459353	0.0252207063207422	-0.000951825121904122	1.2250941680102	0.845388963389133	0.07718487852259	0.403916839934828	0.0844126833302838	0.0834347942900692	4.43202664498615	1.19927901933132	1933	0.09185
B220-CD4-MHCII-IgD	clade2	Thymus_C57BL6	-0.048308108800656	2.4408343104153	0.399372187552349	1.67493284217186	0.525428119880757	0.223057744317178	0.264213968593824	0.0779598196984651	0.210872804883014	0.129104668723171	0.136665355173303	0.845076275967882	0.183630827613354	0.683108711837989	0.166011397506735	0.649350910068698	0.213797851119906	0.162766915004249	2.37200280944895	0.447356800184833	0.150629107003755	3.2933526435518	0.881951597847349	0.110372294549038	0.0300548268756763	0.266591035244684	2.57881343334265	0.176221732911637	0.0778604980018107	0.180128963143812	-0.0107283064703052	0.165438145362131	0.248071049217377	0.24603317992515	0.254655644383638	0.193533658560417	3.0579469541865	2.93607387410827	5.76394558153766	13164	0.6255
CD3-CD5-CD44-CD45.2	clade52	Thymus_C57BL6	-0.0517037321824383	2.50665958550139	0.265724347038445	0.0245378281280993	-0.0219896503135542	0.0350755406665794	3.1118283885168	0.251254182115674	0.0179010219233933	0.0287086922956711	0.0208713036652376	-0.050652931991159	-0.0374283538941427	0.238528093082826	0.365773657463062	0.817908522271737	0.0183583587234473	1.68395731478248	0.268481844313158	0.0365043769273467	0.117629509858062	0.127830656911926	3.20209479437787	0.279555831326231	0.166160998858468	0.113733277828088	0.954116011264978	0.228148747997737	0.0350213579929601	0.0422009251162897	0.00487025159231847	1.31345459445622	1.66140224248078	0.169308212875724	0.0495610558795497	0.0259483936835705	0.0906152668529898	4.20642308938956	1.2540609821672	2708	0.1287
CD44-CD5-Ter119-Ly6C	clade7	Thymus_C57BL6	-0.0524178487180807	2.57901095280819	0.253171203736209	0.0343837382651199	-0.027493784503322	0.0342378262738032	2.98404282555202	0.23505768750498	0.0137024187237963	0.0315496679056569	0.03117185556807	-0.0415453382952266	-0.0146504073639539	0.302223634902601	3.21232250205981	1.65238914252591	0.16428444853005	1.5417041465262	0.245338214987389	0.0235413393090781	0.0986539289711842	0.0969213345989275	3.37146776616697	0.273049783158315	0.0166815761821005	0.104094922317164	2.02129959634967	0.471759747218095	0.0291929496831888	0.0232355618617703	0.0207013045708309	1.50180899700936	1.89600954936064	0.175759933756141	0.00616522036374178	0.0383832377626234	0.102026747249401	4.56376547056888	1.41637117934208	15638	0.7431
Sca1-CD3-CD5-CCR7	clade8	Thymus_C57BL6	-0.0490953125746775	2.71695062883413	0.280811242016048	0.0337828038584088	-0.0304559341603258	0.0264005007568022	2.95120103900975	0.216555391062051	0.0119547304735516	0.0303592682623079	0.0212602455364601	-0.0493866697226328	-0.0214107739486198	0.303056597293233	-0.000585900511960461	4.17844278158047	0.374112348744629	1.51626093494397	0.242306389564541	0.0558539637284809	0.285190954009116	0.0774239823807083	4.72631868348779	0.474044653094057	0.0321042594822541	0.433794364259411	0.588085718473322	-0.0104779276648066	-0.0216560281798223	0.221412244524086	0.0259571725320394	2.43710361537706	1.71356117616778	0.132182884184474	-0.0147619963677227	-0.0459690979588029	0.0603945208581304	0.956133187663817	0.83415001630361	182924	8.692
CD115-CD27-CD16_32-CD5	esc_10_1	Thymus_C57BL6	-0.057717953023143	1.93993500499913	0.574923639100857	0.0734238450477122	0.0033984672042558	0.160154557688767	0.342353405991615	0.183633655457044	-0.0100914528714916	0.25846456709237	0.324443591254179	0.19825697150725	0.861006397932123	1.41336802470283	3.32384302338803	0.985069020534596	0.168669375524206	0.232422286952074	2.65442241700717	0.361686296550605	0.160822491113459	0.457818581210408	0.94485190203145	0.264951891521903	0.116922353262919	0.551782218654533	5.13971161652733	0.525327039632706	0.0915066220182648	0.0606051718820981	0.0412640161097575	0.167316586322109	0.472292803825238	0.237921778633372	3.81081969942219	0.934257231255001	6.69210467005037	4.18548207797263	2.82731498624919	302	0.01435
x120g8-Sca1-B220-CD11c	esc_10_2	Thymus_C57BL6	-0.0493682257322462	2.06242425198198	0.335396700313102	0.0755915262570982	1.73453520332929	0.198358975027268	0.227874934170475	0.121779380375966	0.0171869588274393	0.183359426234166	0.155347568873334	0.0103097389239669	3.48911768843695	1.59666284555321	3.52616763267807	2.24771054424761	0.284714765566626	0.0627276052590074	1.18688296354698	0.10052766862848	0.122500316929768	1.98674847921593	0.599611385530296	0.103234653527697	0.0556731939463046	0.492473125661344	4.56658894863526	0.454908329025467	0.135706147884003	0.00868100084817821	-0.000970112840123081	0.0913301462412425	0.516643130163288	0.0455981539561642	0.404447686175201	0.0354163072793754	0.293240068454039	5.2194384506936	2.66383577781101	1489	0.07075
